# Supplementary material for: In Silico Analysis of SARS-CoV-2 Spike Proteins of Different Field Variants
Source: MDPI journal article supplement (doi:10.3390/vaccines11040736), 2023-03-27
Supplement: s1 [file s1]

# **In Silico Analysis of SARS-CoV2 Spike Proteins of Different Field Variants**

Muhammad Haseeb \*, Afreenish Amir and Aamer Ikram

Department of Microbiology National Institute of Health, Islamabad 45500, Pakistan

\* Correspondence: [muhammadhaseebtariq19@gmail.com](mailto:muhammadhaseebtariq19@gmail.com)

## Supplementary Figures

### 1. Envelope Protein

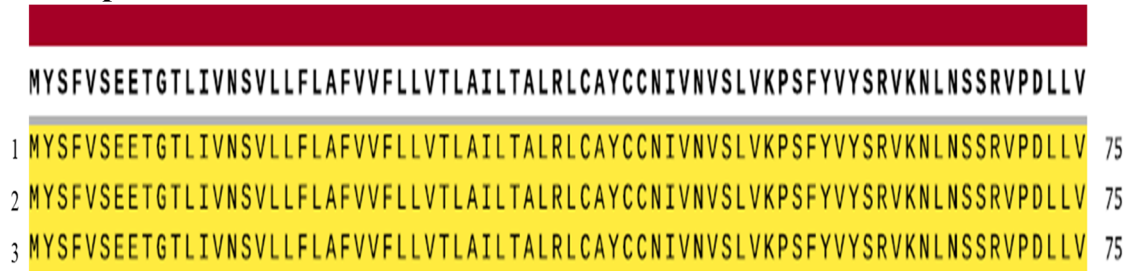

**Figure S1.** Schematic view of contigs of the envelope protein of 1. Alpha variant (B.1.1.7) (UDQ41840.1) and 2. Delta variant (B.1.617.21) (UDU36748.1) of SARs-CoV-2 with 3. reference strain (Wuhan) (YP\_009724392.1).



## 2. Membrane Protein

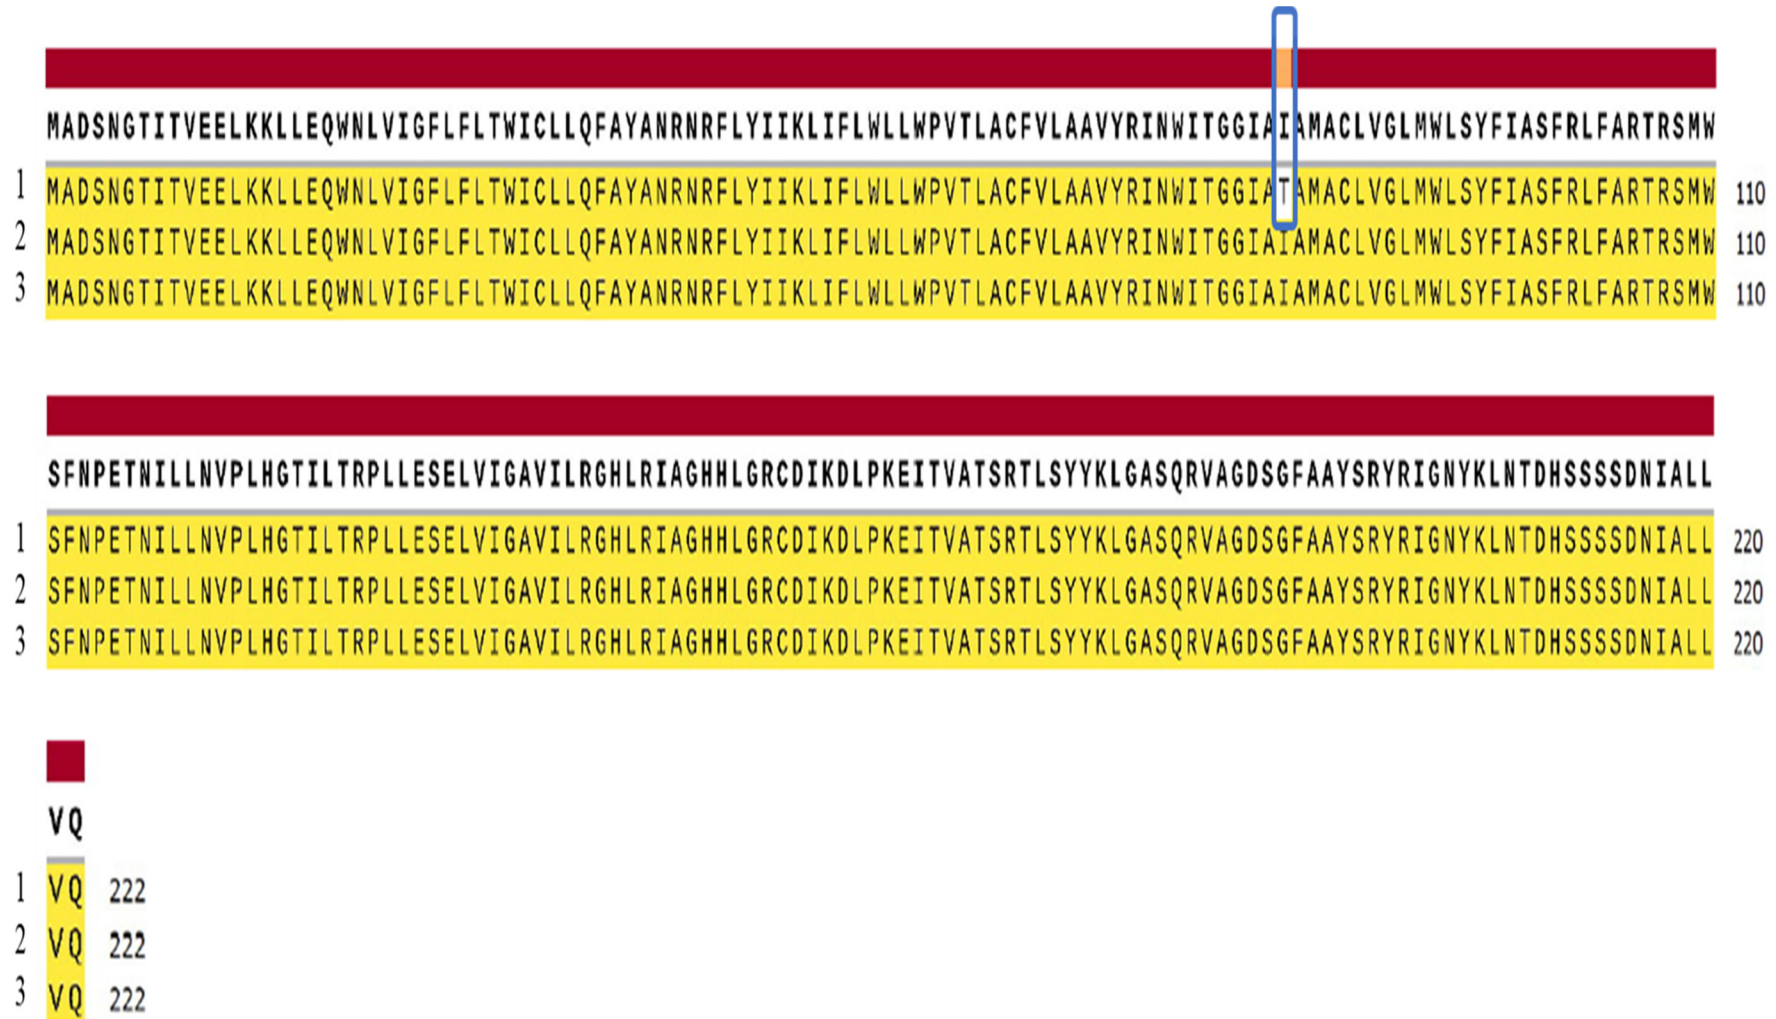

**Figure S2.** Schematic view of contigs of the membrane glycoprotein of 1. Alpha Variant (B.1.1.7) (UDQ41841.1) and 2. Delta Variant (B.1.617.21) (UDU36749.1) of SARs-CoV-2 with 3. reference strain (Wuhan) (YP\_009724393.1).

### 3. Nucleocapsid Phosphoprotein

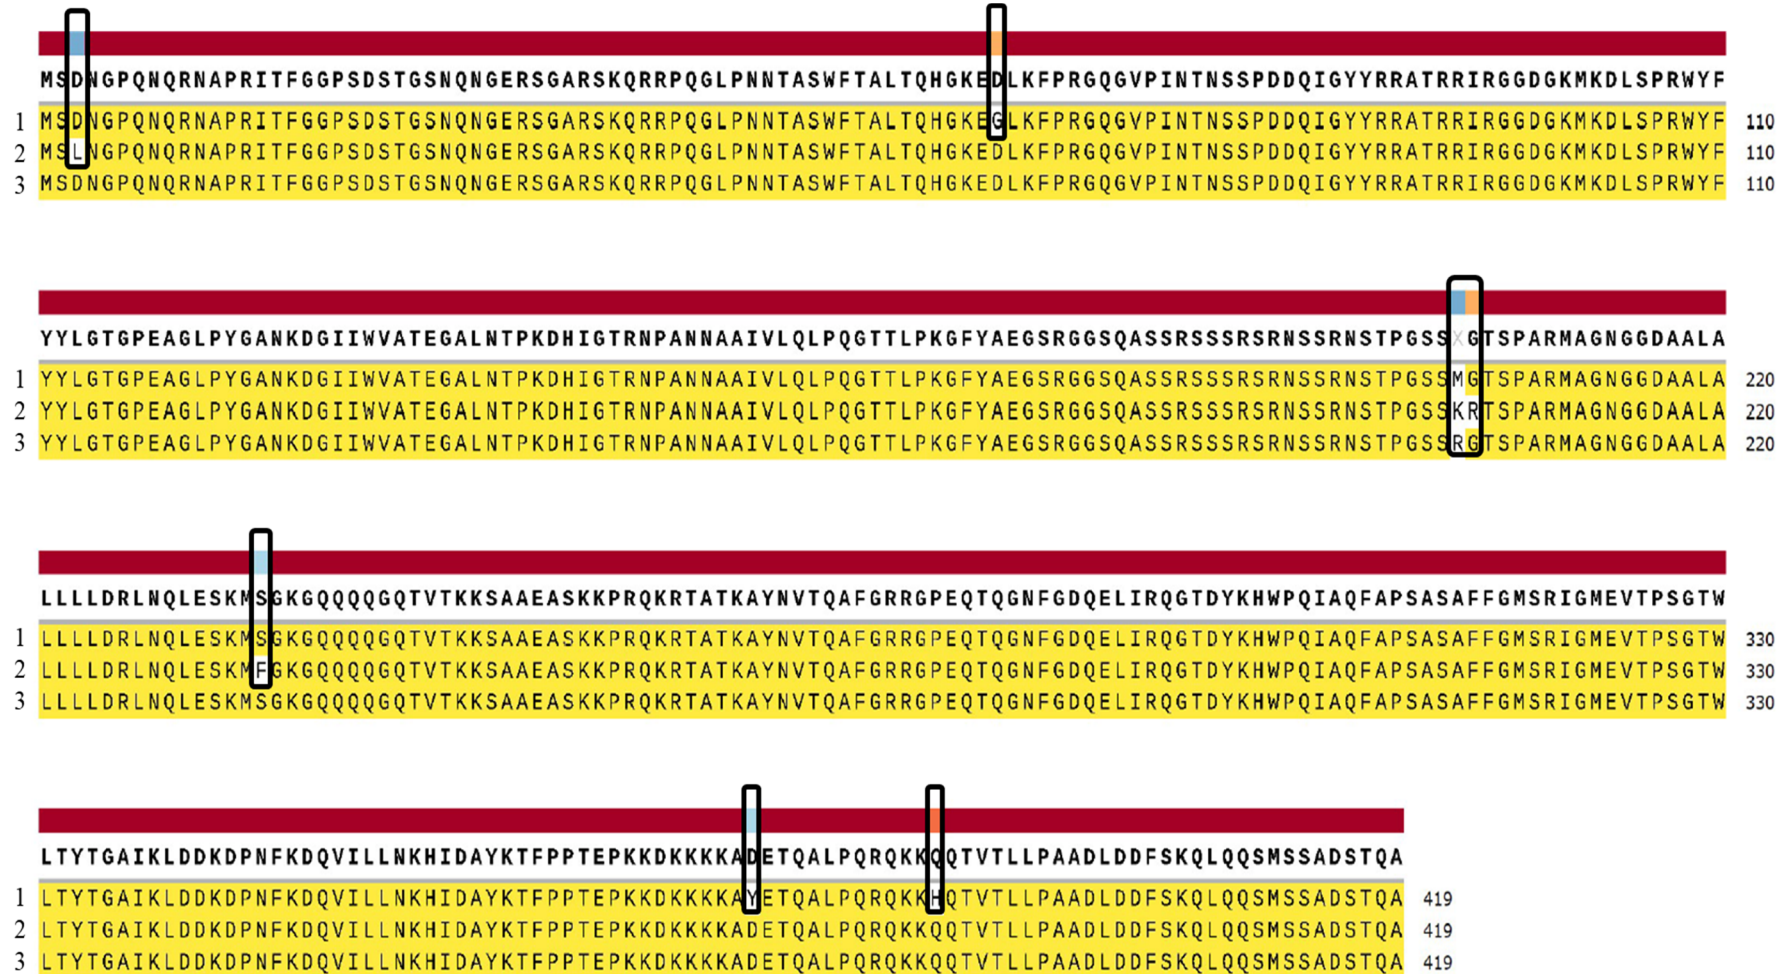

**Figure S3.** Schematic view of contigs of the Nucleocapsid phosphoprotein of 1. Alpha Variant (B.1.1.7) (UDQ41846.1) and 2. Delta Variant (B.1.617.21) (UDU36754.1) of SARs-CoV-2 with 3. reference strain (Wuhan) (YP\_009724397.2).

#### 4. ORF10 protein

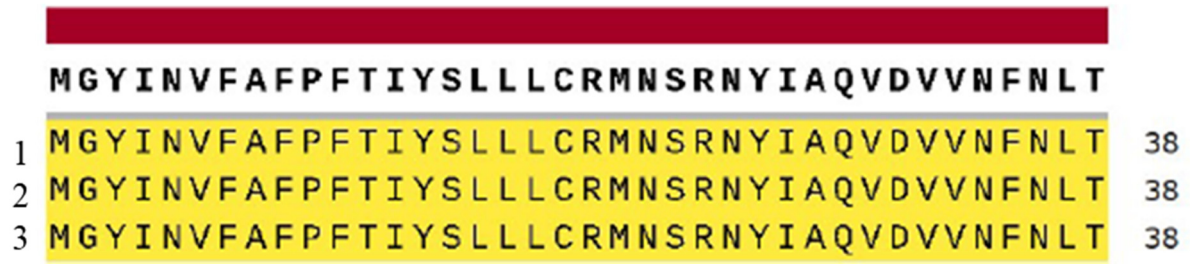

**Figure S4.** Schematic view of contigs of the ORF10 protein of 1. Alpha Variant (B.1.1.7) (UDQ41847.1) and 2. Delta Variant (B.1.617.21) (UDU36755.1) of SARs-CoV-2 with 3. reference Strain (Wuhan) (YP\_009725255.1).



## 5. ORF1a polyprotein

|                                                                                                                  |                                                                                                                  |     |
|------------------------------------------------------------------------------------------------------------------|------------------------------------------------------------------------------------------------------------------|-----|
| MESLVPGFNEKTHVQLSLPVLQVRDVLVRGFGDSVEEVLSEARQHLDGTCGLVEVEKGVLPQLEQPYVFIKRS DARTAPHGHVMVELVAELEGIQYGRSGETLGVLPVH   |                                                                                                                  |     |
| 1                                                                                                                | MESLVPGFNEKTHVQLSLPVLQVRDVLVRGFGDSVEEVLSEARQHLDGTCGLVEVEKGVLPQLEQPYVFIKRS DARTAPHGHVMVELVAELEGIQYGRSGETLGVLPVH   | 110 |
| 2                                                                                                                | MESLVPGFNEKTHVQLSLPVLQVRDVLVRGFGDSVEEVLSEARQHLDGTCGLVEVEKGVLPQLEQPYVFIKRS DARTAPHGHVMVELVAELEGIQYGRSGETLGVLPVH   | 110 |
| 3                                                                                                                | MESLVPGFNEKTHVQLSLPVLQVRDVLVRGFGDSVEEVLSEARQHLDGTCGLVEVEKGVLPQLEQPYVFIKRS DARTAPHGHVMVELVAELEGIQYGRSGETLGVLPVH   | 110 |
| VGEIPVAYRKVLLRKNGNKGAGGHSYGADLKSF DLGDELGTDPYEDFQENWNTKHSSGVTRELMRELNGGAYTRYVDN NFGCPDGYPLECIKDLLARAGKASCTLSEQLD |                                                                                                                  |     |
| 1                                                                                                                | VGEIPVAYRKVLLRKNGNKGAGGHSYGADLKSF DLGDELGTDPYEDFQENWNTKHSSGVTRELMRELNGGAYTRYVDN NFGCPDGYPLECIKDLLARAGKASCTLSEQLD | 220 |
| 2                                                                                                                | VGEIPVAYRKVLLRKNGNKGAGGHSYGADLKSF DLGDELGTDPYEDFQENWNTKHSSGVTRELMRELNGGAYTRYVDN NFGCPDGYPLECIKDLLARAGKASCTLSEQLD | 220 |
| 3                                                                                                                | VGEIPVAYRKVLLRKNGNKGAGGHSYGADLKSF DLGDELGTDPYEDFQENWNTKHSSGVTRELMRELNGGAYTRYVDN NFGCPDGYPLECIKDLLARAGKASCTLSEQLD | 220 |
| FIDTKRGVYCCREHEHEIAWYTERSEKSYELQTPFEIKLAKKFDTFNGECPNFVFPLNSIIKTIQPRVEKKLDGFMGRIRSVYPVASPNECNQMCLSTLMKCDHCGETS    |                                                                                                                  |     |
| 1                                                                                                                | FIDTKRGVYCCREHEHEIAWYTERSEKSYELQTPFEIKLAKKFDTFNGECPNFVFPLNSIIKTIQPRVEKKLDGFMGRIRSVYPVASPNECNQMCLSTLMKCDHCGETS    | 330 |
| 2                                                                                                                | FIDTKRGVYCCREHEHEIAWYTERSEKSYELQTPFEIKLAKKFDTFNGECPNFVFPLNSIIKTIQPRVEKKLDGFMGRIRSVYPVASPNECNQMCLSTLMKCDHCGETS    | 330 |
| 3                                                                                                                | FIDTKRGVYCCREHEHEIAWYTERSEKSYELQTPFEIKLAKKFDTFNGECPNFVFPLNSIIKTIQPRVEKKLDGFMGRIRSVYPVASPNECNQMCLSTLMKCDHCGETS    | 330 |
| WQTGDFVKATCEFCGTENLTKEGATTCGYLPQNAVVKIYCPACHNSEVGPEHSLAEYHNESGLKTI LRKGGRTIAFGGCVFSYVGCHNKAYWVPRASANIGCNHTGVVG   |                                                                                                                  |     |
| 1                                                                                                                | WQTGDFVKATCEFCGTENLTKEGATTCGYLPQNAVVKIYCPACHNSEVGPEHSLAEYHNESGLKTI LRKGGRTIAFGGCVFSYVGCHNKAYWVPRASANIGCNHTGVVG   | 440 |
| 2                                                                                                                | WQTGDFVKATCEFCGTENLTKEGATTCGYLPQNAVVKIYCPACHNSEVGPEHSLAEYHNESGLKTI LRKGGRTIAFGGCVFSYVGCHNKAYWVPRASANIGCNHTGVVG   | 440 |
| 3                                                                                                                | WQTGDFVKATCEFCGTENLTKEGATTCGYLPQNAVVKIYCPACHNSEVGPEHSLAEYHNESGLKTI LRKGGRTIAFGGCVFSYVGCHNKAYWVPRASANIGCNHTGVVG   | 440 |

EGSEGLNDNLLEILQKEKVNINIVGDFKLNEEIAILASFSASTSAFVETVKGLDYKAFKQIVESC GNFKVTKGKAKKGAWNIGE QKSILSPLYAFASEAARVVR SIFSR

1 EGSEGLNDNLLEILQKEKVNINIVGDFKLNEEIAILASFSASTSAFVETVKGLDYKAFKQIVESC GNFKVTKGKAKKGAWNIGE QKSILSPLYAFASEAARVVR SIFSR 550  
2 EGSEGLNDNLLEILQKEKVNINIVGDFKLNEEIAILASFSASTSAFVETVKGLDYKAFKQIVESC GNFKVTKGKAKKGAWNIGE QKSILSPLYAFASEAARVVR SIFSR 550  
3 EGSEGLNDNLLEILQKEKVNINIVGDFKLNEEIAILASFSASTSAFVETVKGLDYKAFKQIVESC GNFKVTKGKAKKGAWNIGE QKSILSPLYAFASEAARVVR SIFSR 550

TLETAQNSVRVLQKAAITILDGISQYSLRLIDAMMFTSDLATNNLVVMAYITGGVVQLTSQWLTNIFGT VYEKLKPVLDWLEEFKEGVEFLRDGWEIVKFISTCACEIV

1 TLETAQNSVRVLQKAAITILDGISQYSLRLIDAMMFTSDLATNNLVVMAYITGGVVQLTSQWLTNIFGT VYEKLKPVLDWLEEFKEGVEFLRDGWEIVKFISTCACEIV 660  
2 TLETAQNSVRVLQKAAITILDGISQYSLRLIDAMMFTSDLATNNLVVMAYITGGVVQLTSQWLTNIFGT VYEKLKPVLDWLEEFKEGVEFLRDGWEIVKFISTCACEIV 660  
3 TLETAQNSVRVLQKAAITILDGISQYSLRLIDAMMFTSDLATNNLVVMAYITGGVVQLTSQWLTNIFGT VYEKLKPVLDWLEEFKEGVEFLRDGWEIVKFISTCACEIV 660

GGQIVTCAKEIKESVQTFFKLVNKFLALCADSIIIGGAKLKALNLGETFVTHSKGLYRKC VKSREETGLLMPLKAPKEIIFLEGETLPTEVLTEEVVLKTGDLQPLEQPT

1 GGQIVTCAKEIKESVQTFFKLVNKFLALCADSIIIGGAKLKALNLGETFVTHSKGLYRKC VKSREETGLLMPLKAPKEIIFLEGETLPTEVLTEEVVLKTGDLQPLEQPT 770  
2 GGQIVTCAKEIKESVQTFFKLVNKFLALCADSIIIGGAKLKALNLGETFVTHSKGLYRKC VKSREETGLLMPLKAPKEIIFLEGETLPTEVLTEEVVLKTGDLQPLEQPT 770  
3 GGQIVTCAKEIKESVQTFFKLVNKFLALCADSIIIGGAKLKALNLGETFVTHSKGLYRKC VKSREETGLLMPLKAPKEIIFLEGETLPTEVLTEEVVLKTGDLQPLEQPT 770

SEAVEAPLVGTPVCINGLMLEIKDTEKYCALAPNMMVTNNTFTLKGGAPTKVTFGDDTVIEVQGYKSVNITFELDERIDKVLNEKCSAYTVELGTEVNEFACVVADAVI

1 SEAVEAPLVGTPVCINGLMLEIKDTEKYCALAPNMMVTNNTFTLKGGAPTKVTFGDDTVIEVQGYKSVNITFELDERIDKVLNEKCSAYTVELGTEVNEFACVVADAVI 880  
2 SEAVEAPLVGTPVCINGLMLEIKDTEKYCALAPNMMVTNNTFTLKGGAPTKVTFGDDTVIEVQGYKSVNITFELDERIDKVLNEKCSAYTVELGTEVNEFACVVADAVI 880  
3 SEAVEAPLVGTPVCINGLMLEIKDTEKYCALAPNMMVTNNTFTLKGGAPTKVTFGDDTVIEVQGYKSVNITFELDERIDKVLNEKCSAYTVELGTEVNEFACVVADAVI 880



KTLPVSELLTPLGIDLDEWSMATYYLFDSEGEFKLASHMYCSFYPPDEDEEEGDCEEEEFEPSTQY EYGTEDDYQGKPLEFGATSAALQPEEEQEEDWLDDDSQQTVGQ

1 KTLQPVSELLTPLGIDLDEWSMATYYLFDSEGEFKLASHMYCSFYPPDEDEEEGDCEEEEFEPSTQY EYGTEDDYQGKPLEFGATSAALQPEEEQEEDWLDDDSQQTVGQ 990  
2 KTLQPVSELLTPLGIDLDEWSMATYYLFDSEGEFKLASHMYCSFYPPDEDEEEGDCEEEEFEPSTQY EYGTEDDYQGKPLEFGATSAALQPEEEQEEDWLDDDSQQTVGQ 990  
3 KTLQPVSELLTPLGIDLDEWSMATYYLFDSEGEFKLASHMYCSFYPPDEDEEEGDCEEEEFEPSTQY EYGTEDDYQGKPLEFGATSAALQPEEEQEEDWLDDDSQQTVGQ 990

QDGS EDNQTTTIQTIVEVQPQLEMELTPVVQTIEVNSFSGYLKLT DNVIYIKNADIVEEAKKVKPTVVVNAANVYLKHGGGVAGALNKATNNAMQVESDDYIATNGPLKVG

1 QDGS EDNQTTTIQTIVEVQPQLEMELTPVVQTIEVNSFSGYLKLT DNVIYIKNADIVEEAKKVKPTVVVNAANVYLKHGGGVAGALNKATNNAMQVESDDYIATNGPLKVG 1100  
2 QDGS EDNQTTTIQTIVEVQPQLEMELTPVVQTIEVNSFSGYLKLT DNVIYIKNADIVEEAKKVKPTVVVNAANVYLKHGGGVAGALNKATNNAMQVESDDYIATNGPLKVG 1100  
3 QDGS EDNQTTTIQTIVEVQPQLEMELTPVVQTIEVNSFSGYLKLT DNVIYIKNADIVEEAKKVKPTVVVNAANVYLKHGGGVAGALNKATNNAMQVESDDYIATNGPLKVG 1100

GSCVLSGHNLA KHCLHVVGP NVNKGEDIQLLKSAYENFNQHEVLLAPLLSAGIFGADPIHSLRVCVDTVRTNVYLAVFDKNLYDKLVSSFLEMKSEKQVEQKIAEIPKEE

1 GSCVLSGHNLA KHCLHVVGP NVNKGEDIQLLKSAYENFNQHEVLLAPLLSAGIFGADPIHSLRVCVDTVRTNVYLAVFDKNLYDKLVSSFLEMKSEKQVEQKIAEIPKEE 1210  
2 GSCVLSGHNLA KHCLHVVGP NVNKGEDIQLLKSAYENFNQHEVLLAPLLSAGIFGADPIHSLRVCVDTVRTNVYLAVFDKNLYDKLVSSFLEMKSEKQVEQKIAEIPKEE 1210  
3 GSCVLSGHNLA KHCLHVVGP NVNKGEDIQLLKSAYENFNQHEVLLAPLLSAGIFGADPIHSLRVCVDTVRTNVYLAVFDKNLYDKLVSSFLEMKSEKQVEQKIAEIPKEE 1210

VKPFITESKPSVEQRKQDDKKIKACVEEVTTTLEETKFLTENLLLYIDINGNLHPDSATLVSDIDITFLKKDAPYIVGDVVQEGVLTAVVIPTKKAGGTTEMLAKALRKV

1 VKPFITESKPSVEQRKQDDKKIKACVEEVTTTLEETKFLTENLLLYIDINGNLHPDSATLVSDIDITFLKKDAPYIVGDVVQEGVLTAVVIPTKKAGGTTEMLAKALRKV 1320  
2 VKPFITESKPSVEQRKQDDKKIKACVEEVTTTLEETKFLTENLLLYIDINGNLHPDSATLVSDIDITFLKKDAPYIVGDVVQEGVLTAVVIPTKKAGGTTEMLAKALRKV 1320  
3 VKPFITESKPSVEQRKQDDKKIKACVEEVTTTLEETKFLTENLLLYIDINGNLHPDSATLVSDIDITFLKKDAPYIVGDVVQEGVLTAVVIPTKKAGGTTEMLAKALRKV 1320

PTDNYITTPGQGLNGYTVVEAKTVLKKCKSAFYILPSIISNEKQEILGTVSWNLREMLAHAEETRKLMPVCVETKAIVSTIQRKYKGIKIQEGVVDYGARFYFYTSKTT

1 PTDNYITTPGQGLNGYTVVEAKTVLKKCKSAFYILPSIISNEKQEILGTVSWNLREMLAHAEETRKLMPVCVETKAIVSTIQRKYKGIKIQEGVVDYGARFYFYTSKTT 1430  
2 PTDNYITTPGQGLNGYTVVEAKTVLKKCKSAFYILPSIISNEKQEILGTVSWNLREMLAHAEETRKLMPVCVETKAIVSTIQRKYKGIKIQEGVVDYGARFYFYTSKTT 1430  
3 PTDNYITTPGQGLNGYTVVEAKTVLKKCKSAFYILPSIISNEKQEILGTVSWNLREMLAHAEETRKLMPVCVETKAIVSTIQRKYKGIKIQEGVVDYGARFYFYTSKTT 1430

VASLINTLNDLNETLVTMPLGYVTHGLNLEEAARYMRSCLKVPATVSVSSPDAVTAYNGYLTSSSKTPEEHFIETISLAGSYKDWSSYGQSTQLGIEFLKRGDKSVYYTSN

1 VASLINTLNDLNETLVTMPLGYVTHGLNLEEAARYMRSCLKVPATVSVSSPDAVTAYNGYLTSSSKTPEEHFIETISLAGSYKDWSSYGQSTQLGIEFLKRGDKSVYYTSN 1540  
2 VASLINTLNDLNETLVTMPLGYVTHGLNLEEAARYMRSCLKVPATVSVSSPDAVTAYNGYLTSSSKTPEEHFIETISLAGSYKDWSSYGQSTQLGIEFLKRGDKSVYYTSN 1540  
3 VASLINTLNDLNETLVTMPLGYVTHGLNLEEAARYMRSCLKVPATVSVSSPDAVTAYNGYLTSSSKTPEEHFIETISLAGSYKDWSSYGQSTQLGIEFLKRGDKSVYYTSN 1540

PTTFHLDGEVITFDNLKTLLSLREVRTIKVFTTVDNINLHTQVVDMSMTYGQQFGPTYLDGADVTKIKPHNSHEGKTFYVLPNDDTLRVEAFEYHYHTDPSFLGRYMSAL

1 PTTFHLDGEVITFDNLKTLLSLREVRTIKVFTTVDNINLHTQVVDMSMTYGQQFGPTYLDGADVTKIKPHNSHEGKTFYVLPNDDTLRVEAFEYHYHTDPSFLGRYMSAL 1650  
2 PTTFHLDGEVITFDNLKTLLSLREVRTIKVFTTVDNINLHTQVVDMSMTYGQQFGPTYLDGADVTKIKPHNSHEGKTFYVLPNDDTLRVEAFEYHYHTDPSFLGRYMSAL 1650  
3 PTTFHLDGEVITFDNLKTLLSLREVRTIKVFTTVDNINLHTQVVDMSMTYGQQFGPTYLDGADVTKIKPHNSHEGKTFYVLPNDDTLRVEAFEYHYHTDPSFLGRYMSAL 1650

NHTKKWKYPQVNGLTSIKWADNNCYLATALLTQQIELKFNPALQDAYYRARAGEAANFCALILAYCNKTVGELGDVRETMSYLFQHANLDSCKRVLNVVCKTCGQQQT

1 NHTKKWKYPQVNGLTSIKWADNNCYLATALLTQQIELKFNPALQDAYYRARAGEAANFCALILAYCNKTVGELGDVRETMSYLFQHANLDSCKRVLNVVCKTCGQQQT 1760  
2 NHTKKWKYPQVNGLTSIKWADNNCYLATALLTQQIELKFNPALQDAYYRARAGEAANFCALILAYCNKTVGELGDVRETMSYLFQHANLDSCKRVLNVVCKTCGQQQT 1760  
3 NHTKKWKYPQVNGLTSIKWADNNCYLATALLTQQIELKFNPALQDAYYRARAGEAANFCALILAYCNKTVGELGDVRETMSYLFQHANLDSCKRVLNVVCKTCGQQQT 1760



TLKGVEAVMYMGTLSYEQFKKGVQIPCTCGKQATKYLQQESPFVMSAPPAQYELKHGFTFCASEYTGNYQCGHYKHITSKETLYCIDGALLTKSSEYKGPITDVFYKE

1 TLKGVEAVMYMGTLSYEQFKKGVQIPCTCGKQATKYLQQESPFVMSAPPAQYELKHGFTFCASEYTGNYQCGHYKHITSKETLYCIDGALLTKSSEYKGPITDVFYKE 1870  
2 TLKGVEAVMYMGTLSYEQFKKGVQIPCTCGKQATKYLQQESPFVMSAPPAQYELKHGFTFCASEYTGNYQCGHYKHITSKETLYCIDGALLTKSSEYKGPITDVFYKE 1870  
3 TLKGVEAVMYMGTLSYEQFKKGVQIPCTCGKQATKYLQQESPFVMSAPPAQYELKHGFTFCASEYTGNYQCGHYKHITSKETLYCIDGALLTKSSEYKGPITDVFYKE 1870

NSYTTTIKPVTYKLDGVVCTEIDPKLDNYYKKDNSYFTEQPIDLVPNQYPYNASFDNFKFVCDNIKFADDLNQLTGYYKKPASRELKVTFPPDLNGDVVAIDYKHYTPSFK

1 NSYTTTIKPVTYKLDGVVCTEIDPKLDNYYKKDNSYFTEQPIDLVPNQYPYNASFDNFKFVCDNIKFADDLNQLTGYYKKPASRELKVTFPPDLNGDVVAIDYKHYTPSFK 1980  
2 NSYTTTIKPVTYKLDGVVCTEIDPKLDNYYKKDNSYFTEQPIDLVPNQYPYNASFDNFKFVCDNIKFADDLNQLTGYYKKPASRELKVTFPPDLNGDVVAIDYKHYTPSFK 1980  
3 NSYTTTIKPVTYKLDGVVCTEIDPKLDNYYKKDNSYFTEQPIDLVPNQYPYNASFDNFKFVCDNIKFADDLNQLTGYYKKPASRELKVTFPPDLNGDVVAIDYKHYTPSFK 1980

KGAKLLHKPIVWHVNNATNKATYKPNTWCIRCLWSTKPVETSNSFDVLKSEDAQGMDNLACEDLKPVSEEVVENPTIQKDVLECNVKTTEVVGDIILKPANNSLKITEEV

1 KGAKLLHKPIVWHVNNATNKATYKPNTWCIRCLWSTKPVETSNSFDVLKSEDAQGMDNLACEDLKPVSEEVVENPTIQKDVLECNVKTTEVVGDIILKPANNSLKITEEV 2090  
2 KGAKLLHKPIVWHVNNATNKATYKPNTWCIRCLWSTKPVETSNSFDVLKSEDAQGMDNLACEDLKPVSEEVVENPTIQKDVLECNVKTTEVVGDIILKPANNSLKITEEV 2090  
3 KGAKLLHKPIVWHVNNATNKATYKPNTWCIRCLWSTKPVETSNSFDVLKSEDAQGMDNLACEDLKPVSEEVVENPTIQKDVLECNVKTTEVVGDIILKPANNSLKITEEV 2090

GHTDLMAAYVDNSSLTIKKPNELSRVLGLKTLATHGLAAVNSVPWDTIANYAKPFLNKVVSTTTNIVTRCLNRVCTNYMPYFFTLQLCTFTRSTNSRIKASMPPTIAK

1 GHTDLMAAYVDNSSLTIKKPNELSRVLGLKTLATHGLAAVNSVPWDTIANYAKPFLNKVVSTTTNIVTRCLNRVCTNYMPYFFTLQLCTFTRSTNSRIKASMPPTIAK 2200  
2 GHTDLMAAYVDNSSLTIKKPNELSRVLGLKTLATHGLAAVNSVPWDTIANYAKPFLNKVVSTTTNIVTRCLNRVCTNYMPYFFTLQLCTFTRSTNSRIKASMPPTIAK 2200  
3 GHTDLMAAYVDNSSLTIKKPNELSRVLGLKTLATHGLAAVNSVPWDTIANYAKPFLNKVVSTTTNIVTRCLNRVCTNYMPYFFTLQLCTFTRSTNSRIKASMPPTIAK 2200



NTVKS VGKFCLEASFN YLKSPNFSKLINIIWFLLLSVCLGSLIYSTAALGVLM SNLGMPSYCTGYREGYLNSTNVTIATYCTGSIPCSVCLSGLDSDLTYP SLETIQIT

1 NTVKS VGKFCLEASFN YLKSPNFSKLINIIWFLLLSVCLGSLIYSTAALGVLM SNLGMPSYCTGYREGYLNSTNVTIATYCTGSIPCSVCLSGLDSDLTYP SLETIQIT 2310

2 NTVKS VGKFCLEASFN YLKSPNFSKLINIIWFLLLSVCLGSLIYSTAALGVLM SNLGMPSYCTGYREGYLNSTNVTIATYCTGSIPCSVCLSGLDSDLTYP SLETIQIT 2310

3 NTVKS VGKFCLEASFN YLKSPNFSKLINIIWFLLLSVCLGSLIYSTAALGVLM SNLGMPSYCTGYREGYLNSTNVTIATYCTGSIPCSVCLSGLDSDLTYP SLETIQIT 2310

ISSFKWDLTAFGLVAEWFLAYILFTRFFYVLGLAATMQLFFSYFAVHFISNSWLMWLIINLVQMAPISAMVRMYIFFASFYYVWKS YVHVVDGCNSSTCMMCYKRNRATR

1 ISSFKWDLTAFGLVAEWFLAYILFTRFFYVLGLAATMQLFFSYFAVHFISNSWLMWLIINLVQMAPISAMVRMYIFFASFYYVWKS YVHVVDGCNSSTCMMCYKRNRATR 2420

2 ISSFKWDLTAFGLVAEWFLAYILFTRFFYVLGLAATMQLFFSYFAVHFISNSWLMWLIINLVQMAPISAMVRMYIFFASFYYVWKS YVHVVDGCNSSTCMMCYKRNRATR 2420

3 ISSFKWDLTAFGLVAEWFLAYILFTRFFYVLGLAATMQLFFSYFAVHFISNSWLMWLIINLVQMAPISAMVRMYIFFASFYYVWKS YVHVVDGCNSSTCMMCYKRNRATR 2420

VECTTIVNGVRRSFYVYANGGKGFC KLHNWNCVNCDTFCAGSTFISDEVARDLSLQFKRPINPTDQSSYIVDSVTVKNGSIHLYFDKAGQKTYERHSLSHFVNLDNLRAN

1 VECTTIVNGVRRSFYVYANGGKGFC KLHNWNCVNCDTFCAGSTFISDEVARDLSLQFKRPINPTDQSSYIVDSVTVKNGSIHLYFDKAGQKTYERHSLSHFVNLDNLRAN 2530

2 VECTTIVNGVRRSFYVYANGGKGFC KLHNWNCVNCDTFCAGSTFISDEVARDLSLQFKRPINPTDQSSYIVDSVTVKNGSIHLYFDKAGQKTYERHSLSHFVNLDNLRAN 2530

3 VECTTIVNGVRRSFYVYANGGKGFC KLHNWNCVNCDTFCAGSTFISDEVARDLSLQFKRPINPTDQSSYIVDSVTVKNGSIHLYFDKAGQKTYERHSLSHFVNLDNLRAN 2530

NTKGS LPINVIVFDGKSKCEESSAKSASVYYSQLMCQPILLDDQALVSDVGDSA EVAVKMF DAYVNTFSSTFNVPMEK LKTLVATAEAE LAKNVSLDNVLSTFISAARQG

1 NTKGS LPINVIVFDGKSKCEESSAKSASVYYSQLMCQPILLDDQALVSDVGDSA EVAVKMF DAYVNTFSSTFNVPMEK LKTLVATAEAE LAKNVSLDNVLSTFISAARQG 2640

2 NTKGS LPINVIVFDGKSKCEESSAKSASVYYSQLMCQPILLDDQALVSDVGDSA EVAVKMF DAYVNTFSSTFNVPMEK LKTLVATAEAE LAKNVSLDNVLSTFISAARQG 2640

3 NTKGS LPINVIVFDGKSKCEESSAKSASVYYSQLMCQPILLDDQALVSDVGDSA EVAVKMF DAYVNTFSSTFNVPMEK LKTLVATAEAE LAKNVSLDNVLSTFISAARQG 2640

FVDSDEVTKDVVECLKLSHQSDIEVTGDSNNYMLTYNKVENMTPRDLGACIDCSARHINAQVAKSHNIALIWNVKDFMSLSEQLRKQIRSAAKNNLPFKLTCATTRQV

1 FVDSDEVTKDVVECLKLSHQSDIEVTGDSNNYMLTYNKVENMTPRDLGACIDCSARHINAQVAKSHNIALIWNVKDFMSLSEQLRKQIRSAAKNNLPFKLTCATTRQV 2750  
2 FVDSDEVTKDVVECLKLSHQSDIEVTGDSNNYMLTYNKVENMTPRDLGACIDCSARHINAQVAKSHNIALIWNVKDFMSLSEQLRKQIRSAAKNNLPFKLTCATTRQV 2750  
3 FVDSDEVTKDVVECLKLSHQSDIEVTGDSNNYMLTYNKVENMTPRDLGACIDCSARHINAQVAKSHNIALIWNVKDFMSLSEQLRKQIRSAAKNNLPFKLTCATTRQV 2750

VNVVTTKIALKGGKIVNNWLKQLIKVTLVFLFVAEIFYLITPVHVMKHTDFSSEIIGYKAIDGGVTRDIASTDTCFANKHADFDTWFSQRGGSYTNDKACPLIAAVITR

1 VNVVTTKIALKGGKIVNNWLKQLIKVTLVFLFVAEIFYLITPVHVMKHTDFSSEIIGYKAIDGGVTRDIASTDTCFANKHADFDTWFSQRGGSYTNDKACPLIAAVITR 2860  
2 VNVVTTKIALKGGKIVNNWLKQLIKVTLVFLFVAEIFYLITPVHVMKHTDFSSEIIGYKAIDGGVTRDIASTDTCFANKHADFDTWFSQRGGSYTNDKACPLIAAVITR 2860  
3 VNVVTTKIALKGGKIVNNWLKQLIKVTLVFLFVAEIFYLITPVHVMKHTDFSSEIIGYKAIDGGVTRDIASTDTCFANKHADFDTWFSQRGGSYTNDKACPLIAAVITR 2860

EVGFVVPGLPGTILRTTNGDFLHFLPRVFSAVGNICYTPSKLIEYTDFAVSACVLAAECTIFKDASGKPVPCYDTNVLEGSVAYESLRPDTRYVLMGSIQFPNTYLE

1 EVGFVVPGLPGTILRTTNGDFLHFLPRVFSAVGNICYTPSKLIEYTDFAVSACVLAAECTIFKDASGKPVPCYDTNVLEGSVAYESLRPDTRYVLMGSIQFPNTYLE 2970  
2 EVGFVVPGLPGTILRTTNGDFLHFLPRVFSAVGNICYTPSKLIEYTDFAVSACVLAAECTIFKDASGKPVPCYDTNVLEGSVAYESLRPDTRYVLMGSIQFPNTYLE 2970  
3 EVGFVVPGLPGTILRTTNGDFLHFLPRVFSAVGNICYTPSKLIEYTDFAVSACVLAAECTIFKDASGKPVPCYDTNVLEGSVAYESLRPDTRYVLMGSIQFPNTYLE 2970

GSVRVVTTFDSEYCRHGTCERSEAGVCVSTSGRWVLNNDYYRSLPGVFCGVDAVNLLTNMFTPLIQPIGALDISASIVAGGIVAIIVTCLAYYFMRFRRAFGEYSHVVAF

1 GSVRVVTTFDSEYCRHGTCERSEAGVCVSTSGRWVLNNDYYRSLPGVFCGVDAVNLLTNMFTPLIQPIGALDISASIVAGGIVAIIVTCLAYYFMRFRRAFGEYSHVVAF 3080  
2 GSVRVVTTFDSEYCRHGTCERSEAGVCVSTSGRWVLNNDYYRSLPGVFCGVDAVNLLTNMFTPLIQPIGALDISASIVAGGIVAIIVTCLAYYFMRFRRAFGEYSHVVAF 3080  
3 GSVRVVTTFDSEYCRHGTCERSEAGVCVSTSGRWVLNNDYYRSLPGVFCGVDAVNLLTNMFTPLIQPIGALDISASIVAGGIVAIIVTCLAYYFMRFRRAFGEYSHVVAF 3080



NTLLFLMSFTVLCCLTPVYSFLPGVYSVIYLYLTFYLTNDVSFLAHIQWMVMFTPLVPFWITIAIYIICISTKHFYWFFSNYLKRRVVFNGVSFSTFEEAALCTFLLNKEMY

1 NTLLFLMSFTVLCCLTPVYSFLPGVYSVIYLYLTFYLTNDVSFLAHIQWMVMFTPLVPFWITIAIYIICISTKHFYWFFSNYLKRRVVFNGVSFSTFEEAALCTFLLNKEMY 3190  
2 NTLLFLMSFTVLCCLTPVYSFLPGVYSVIYLYLTFYLTNDVSFLAHIQWMVMFTPLVPFWITIAIYIICISTKHFYWFFSNYLKRRVVFNGVSFSTFEEAALCTFLLNKEMY 3190  
3 NTLLFLMSFTVLCCLTPVYSFLPGVYSVIYLYLTFYLTNDVSFLAHIQWMVMFTPLVPFWITIAIYIICISTKHFYWFFSNYLKRRVVFNGVSFSTFEEAALCTFLLNKEMY 3190

LKLRSDVLLPLTQYNRYLALYNKYKYFSGAMDTTSYREAACCHLAKALNDFSNSGSDVLYQPPQTSITSAVLQSGFRKMAFPSGKVEGCMVQVTCGTTTTLNGLWLDDVVY

1 LKLRSDVLLPLTQYNRYLALYNKYKYFSGAMDTTSYREAACCHLAKALNDFSNSGSDVLYQPPQTSITSAVLQSGFRKMAFPSGKVEGCMVQVTCGTTTTLNGLWLDDVVY 3300  
2 LKLRSDVLLPLTQYNRYLALYNKYKYFSGAMDTTSYREAACCHLAKALNDFSNSGSDVLYQPPQTSITSAVLQSGFRKMAFPSGKVEGCMVQVTCGTTTTLNGLWLDDVVY 3300  
3 LKLRSDVLLPLTQYNRYLALYNKYKYFSGAMDTTSYREAACCHLAKALNDFSNSGSDVLYQPPQTSITSAVLQSGFRKMAFPSGKVEGCMVQVTCGTTTTLNGLWLDDVVY 3300

CPRHVICTSEDMLNPNYEDLLIRKSNHNFLVQAGNVQLRVIGHSMQNCVLKLKVDTANPKTPKYKFVRIQPGQTFSVLACYNGSPSGVYQCAMRPNFTIKGSFLNGSCGS

1 CPRHVICTSEDMLNPNYEDLLIRKSNHNFLVQAGNVQLRVIGHSMQNCVLKLKVDTANPKTPKYKFVRIQPGQTFSVLACYNGSPSGVYQCAMRPNFTIKGSFLNGSCGS 3410  
2 CPRHVICTSEDMLNPNYEDLLIRKSNHNFLVQAGNVQLRVIGHSMQNCVLKLKVDTANPKTPKYKFVRIQPGQTFSVLACYNGSPSGVYQCAMRPNFTIKGSFLNGSCGS 3410  
3 CPRHVICTSEDMLNPNYEDLLIRKSNHNFLVQAGNVQLRVIGHSMQNCVLKLKVDTANPKTPKYKFVRIQPGQTFSVLACYNGSPSGVYQCAMRPNFTIKGSFLNGSCGS 3410

VGFNIDYDCVSFCYMHMELPTGVHAGTDLEGNFYGPFVDRQTAQAAGDTTITVNVLAWLYAAVINGDRWFLNRFTTTLNDFNLVAMKYNIEPLTQDHVDILGPLSAQT

1 VGFNIDYDCVSFCYMHMELPTGVHAGTDLEGNFYGPFVDRQTAQAAGDTTITVNVLAWLYAAVINGDRWFLNRFTTTLNDFNLVAMKYNIEPLTQDHVDILGPLSAQT 3520  
2 VGFNIDYDCVSFCYMHMELPTGVHAGTDLEGNFYGPFVDRQTAQAAGDTTITVNVLAWLYAAVINGDRWFLNRFTTTLNDFNLVAMKYNIEPLTQDHVDILGPLSAQT 3520  
3 VGFNIDYDCVSFCYMHMELPTGVHAGTDLEGNFYGPFVDRQTAQAAGDTTITVNVLAWLYAAVINGDRWFLNRFTTTLNDFNLVAMKYNIEPLTQDHVDILGPLSAQT 3520

GI AVLDMCASLKELLQNGMNGRTILGSALLEDEFTPFDDVVRQCSGVTFQSAVKRTIKGTHHWLLLTILTSLLVLVQSTQWSLFFFLYENAFLPFAMGIIAMSAFAMMFVK

1 GI AVLDMCASLKELLQNGMNGRTILGSALLEDEFTPFDDVVRQCSGVTFQSAVKRTIKGTHHWLLLTILTSLLVLVQSTQWSLFFFLYENAFLPFAMGIIAMSAFAMMFVK 3630  
2 GI AVLDMCASLKELLQNGMNGRTILGSALLEDEFTPFDDVVRQCSGVTFQSAVKRTIKGTHHWLLLTILTSLLVLVQSTQWSLFFFLYENAFLPFAMGIIAMSAFAMMFVK 3630  
3 GI AVLDMCASLKELLQNGMNGRTILGSALLEDEFTPFDDVVRQCSGVTFQSAVKRTIKGTHHWLLLTILTSLLVLVQSTQWSLFFFLYENAFLPFAMGIIAMSAFAMMFVK 3630

HKHAFCLCLFLLPSLATVAYFNMVMPASWVMRIMTWLDMVDTSLSGFKLKDCVMYASAVVLLILMTARTVYDDGARRVWTL MNVLT LVYK VYYGNALDQAISMWALIISV

1 HKHAFCLCLFLLPSLATVAYFNMVMPASWVMRIMTWLDMVDTSLSGFKLKDCVMYASAVVLLILMTARTVYDDGARRVWTL MNVLT LVYK VYYGNALDQAISMWALIISV 3740  
2 HKHAFCLCLFLLPSLATVAYFNMVMPASWVMRIMTWLDMVDTSLSGFKLKDCVMYASAVVLLILMTARTVYDDGARRVWTL MNVLT LVYK VYYGNALDQAISMWALIISV 3737  
3 HKHAFCLCLFLLPSLATVAYFNMVMPASWVMRIMTWLDMVDTSLSGFKLKDCVMYASAVVLLILMTARTVYDDGARRVWTL MNVLT LVYK VYYGNALDQAISMWALIISV 3740

TSNYSGVVTTVMFLARGIVFMCVEYCPIFFITGNTLQCIMLVYCFLGYFCTCYFGLFCLLNRYFRLTLGVYDYL VSTQEFRYMNSQGLLPPKNSIDAFKLN IKLLGVGGK

1 TSNYSGVVTTVMFLARGIVFMCVEYCPIFFITGNTLQCIMLVYCFLGYFCTCYFGLFCLLNRYFRLTLGVYDYL VSTQEFRYMNSQGLLPPKNSIDAFKLN IKLLGVGGK 3850  
2 TSNYSGVVTTVMFLARGIVFMCVEYCPIFFITGNTLQCIMLVYCFLGYFCTCYFGLFCLLNRYFRLTLGVYDYL VSTQEFRYMNSQGLLPPKNSIDAFKLN IKLLGVGGK 3847  
3 TSNYSGVVTTVMFLARGIVFMCVEYCPIFFITGNTLQCIMLVYCFLGYFCTCYFGLFCLLNRYFRLTLGVYDYL VSTQEFRYMNSQGLLPPKNSIDAFKLN IKLLGVGGK 3850

PCIKVATVQSKMSDVKCTSVVLLSVLQQLRVESSSKLWAQCVQLHNDILLAKDTTEAFEKMSVLLSVLLSMQGAVDINKLCEEMLDNRATLQAIASEFSSLPSYAAFATA

1 PCIKVATVQSKMSDVKCTSVVLLSVLQQLRVESSSKLWAQCVQLHNDILLAKDTTEAFEKMSVLLSVLLSMQGAVDINKLCEEMLDNRATLQAIASEFSSLPSYAAFATA 3960  
2 PCIKVATVQSKMSDVKCTSVVLLSVLQQLRVESSSKLWAQCVQLHNDILLAKDTTEAFEKMSVLLSVLLSMQGAVDINKLCEEMLDNRATLQAIASEFSSLPSYAAFATA 3957  
3 PCIKVATVQSKMSDVKCTSVVLLSVLQQLRVESSSKLWAQCVQLHNDILLAKDTTEAFEKMSVLLSVLLSMQGAVDINKLCEEMLDNRATLQAIASEFSSLPSYAAFATA 3960



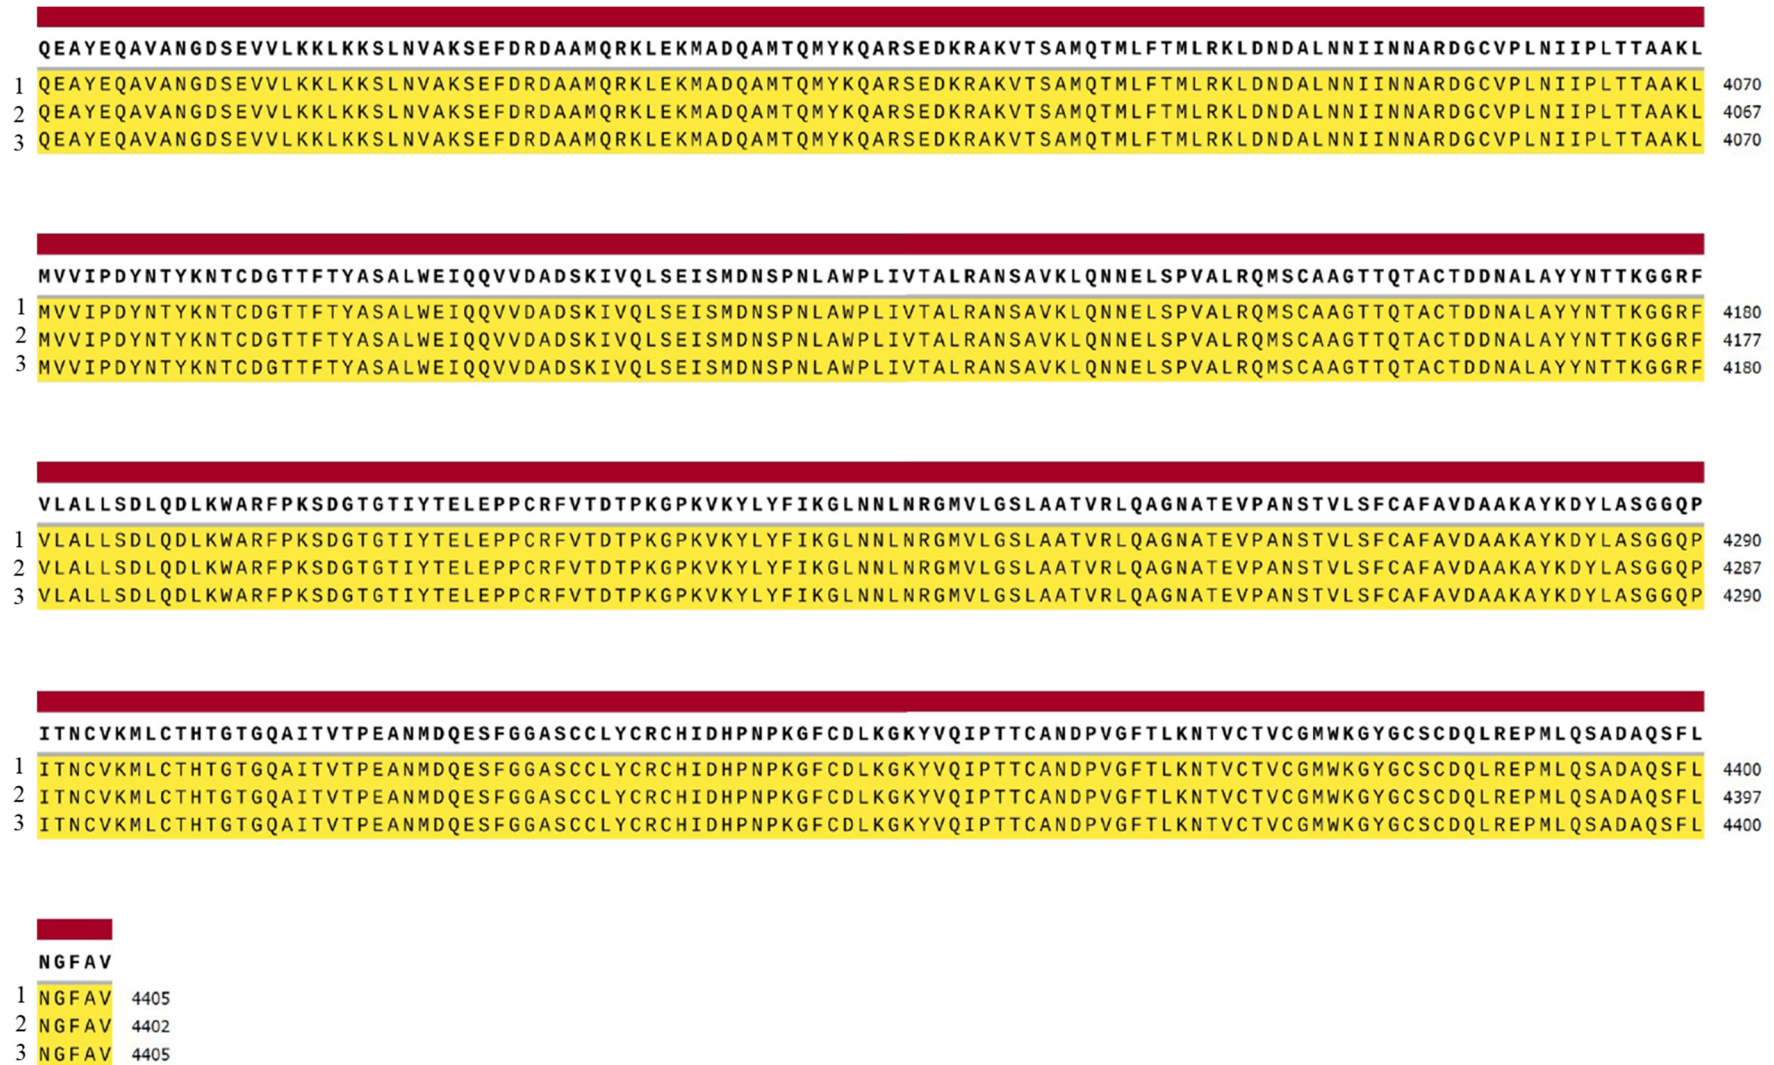

**Figure S5.** Schematic view of contigs of the ORF1a polypeptide of 1. Alpha Variant (B.1.1.7) (UDQ41837.1) and 2. Delta Variant (B.1.617.21) (UDU36745.1) of SARs-CoV-2 with 3. reference Strain (Wuhan) (YP\_009725295.1).

## 6. ORF1ab polyprotein

MESLVPGFNEKTHVQLSLPVLQVRDVLVRGFGDSVEEVLSEARQHLKDGTCLVEVEKGVLPQLEQPYVFIKRS DARTAPHGHVMVELVAELEGIQYGRSGETLGVLVPH 110

1 MESLVPGFNEKTHVQLSLPVLQVRDVLVRGFGDSVEEVLSEARQHLKDGTCLVEVEKGVLPQLEQPYVFIKRS DARTAPHGHVMVELVAELEGIQYGRSGETLGVLVPH 110

2 MESLVPGFNEKTHVQLSLPVLQVRDVLVRGFGDSVEEVLSEARQHLKDGTCLVEVEKGVLPQLEQPYVFIKRS DARTAPHGHVMVELVAELEGIQYGRSGETLGVLVPH 110

3 MESLVPGFNEKTHVQLSLPVLQVRDVLVRGFGDSVEEVLSEARQHLKDGTCLVEVEKGVLPQLEQPYVFIKRS DARTAPHGHVMVELVAELEGIQYGRSGETLGVLVPH 110

VGEIPVAYRKVLLRKNGNKGAGGHSYGADLKSF DLGDELGTD PYEDFQENWNTKHSSGV TRELMRELNGGAYTRYVDN NFCGPDGYPLECIKDLLARAGKASCTLSEQLD 220

1 VGEIPVAYRKVLLRKNGNKGAGGHSYGADLKSF DLGDELGTD PYEDFQENWNTKHSSGV TRELMRELNGGAYTRYVDN NFCGPDGYPLECIKDLLARAGKASCTLSEQLD 220

2 VGEIPVAYRKVLLRKNGNKGAGGHSYGADLKSF DLGDELGTD PYEDFQENWNTKHSSGV TRELMRELNGGAYTRYVDN NFCGPDGYPLECIKDLLARAGKASCTLSEQLD 220

3 VGEIPVAYRKVLLRKNGNKGAGGHSYGADLKSF DLGDELGTD PYEDFQENWNTKHSSGV TRELMRELNGGAYTRYVDN NFCGPDGYPLECIKDLLARAGKASCTLSEQLD 220

FIDTKRGVYCCREHEHEIAWYTERSEKSYELQTPFEIKLAKKFDTFN GECPNFVFPLNSIIKTIQPRVEKKLDGFMGRIRSVYPVASPNECNQMCLSTLMKCDHCGETS 330

1 FIDTKRGVYCCREHEHEIAWYTERSEKSYELQTPFEIKLAKKFDTFN GECPNFVFPLNSIIKTIQPRVEKKLDGFMGRIRSVYPVASPNECNQMCLSTLMKCDHCGETS 330

2 FIDTKRGVYCCREHEHEIAWYTERSEKSYELQTPFEIKLAKKFDTFN GECPNFVFPLNSIIKTIQPRVEKKLDGFMGRIRSVYPVASPNECNQMCLSTLMKCDHCGETS 330

3 FIDTKRGVYCCREHEHEIAWYTERSEKSYELQTPFEIKLAKKFDTFN GECPNFVFPLNSIIKTIQPRVEKKLDGFMGRIRSVYPVASPNECNQMCLSTLMKCDHCGETS 330

WQTGDFVKATCEFCGTENLTKEGATTCGYLPQNAVVKIYCPACHNSEVGPEHSLAEYHNESGLKTI LRKGGRTIAFGGCVFSYVGCHNKAYWVPRASANIGCNHTGVVG 440

1 WQTGDFVKATCEFCGTENLTKEGATTCGYLPQNAVVKIYCPACHNSEVGPEHSLAEYHNESGLKTI LRKGGRTIAFGGCVFSYVGCHNKAYWVPRASANIGCNHTGVVG 440

2 WQTGDFVKATCEFCGTENLTKEGATTCGYLPQNAVVKIYCPACHNSEVGPEHSLAEYHNESGLKTI LRKGGRTIAFGGCVFSYVGCHNKAYWVPRASANIGCNHTGVVG 440

3 WQTGDFVKATCEFCGTENLTKEGATTCGYLPQNAVVKIYCPACHNSEVGPEHSLAEYHNESGLKTI LRKGGRTIAFGGCVFSYVGCHNKAYWVPRASANIGCNHTGVVG 440



EGSEGLNDNLLEILQKEKVNINIVGDFKLNEEIAIILASFSASTSAFVETVKGLDYKAFKQIVESCGNFKVTKGKAKKGAWNIGEQKSILSPYAFASEAARVVRSIFSR

1 EGSEGLNDNLLEILQKEKVNINIVGDFKLNEEIAIILASFSASTSAFVETVKGLDYKAFKQIVESCGNFKVTKGKAKKGAWNIGEQKSILSPYAFASEAARVVRSIFSR 550  
2 EGSEGLNDNLLEILQKEKVNINIVGDFKLNEEIAIILASFSASTSAFVETVKGLDYKAFKQIVESCGNFKVTKGKAKKGAWNIGEQKSILSPYAFASEAARVVRSIFSR 550  
3 EGSEGLNDNLLEILQKEKVNINIVGDFKLNEEIAIILASFSASTSAFVETVKGLDYKAFKQIVESCGNFKVTKGKAKKGAWNIGEQKSILSPYAFASEAARVVRSIFSR 550

TLETAQNSVRVLQKAAITILDGISQYSLRLIDAMMFTSDLATNNLVVMAYITGGVVQLTSQWLTNIFGTVYEKLKPVLDWLEEKFKEGVEFLRDGWEIVKFISTCACEIV

1 TLETAQNSVRVLQKAAITILDGISQYSLRLIDAMMFTSDLATNNLVVMAYITGGVVQLTSQWLTNIFGTVYEKLKPVLDWLEEKFKEGVEFLRDGWEIVKFISTCACEIV 660  
2 TLETAQNSVRVLQKAAITILDGISQYSLRLIDAMMFTSDLATNNLVVMAYITGGVVQLTSQWLTNIFGTVYEKLKPVLDWLEEKFKEGVEFLRDGWEIVKFISTCACEIV 660  
3 TLETAQNSVRVLQKAAITILDGISQYSLRLIDAMMFTSDLATNNLVVMAYITGGVVQLTSQWLTNIFGTVYEKLKPVLDWLEEKFKEGVEFLRDGWEIVKFISTCACEIV 660

GGQIVTCAKEIKESVQTFFKLVNKFLALCADSIIIGGAKLKALNLGETFVTHSKGLYRKC VKSREETGLLMPLKAPKEIIFLEGETLPTEVLTEEVVLKTGDLQPLEQPT

1 GGQIVTCAKEIKESVQTFFKLVNKFLALCADSIIIGGAKLKALNLGETFVTHSKGLYRKC VKSREETGLLMPLKAPKEIIFLEGETLPTEVLTEEVVLKTGDLQPLEQPT 770  
2 GGQIVTCAKEIKESVQTFFKLVNKFLALCADSIIIGGAKLKALNLGETFVTHSKGLYRKC VKSREETGLLMPLKAPKEIIFLEGETLPTEVLTEEVVLKTGDLQPLEQPT 770  
3 GGQIVTCAKEIKESVQTFFKLVNKFLALCADSIIIGGAKLKALNLGETFVTHSKGLYRKC VKSREETGLLMPLKAPKEIIFLEGETLPTEVLTEEVVLKTGDLQPLEQPT 770

SEAVEAPLVGTPVCINGLMLEIKDTEKYCALAPNMMVTNNTFTLKGGAPTKVTFGDDTVIEVQGYKSVNITFELDERIDKVLNEKCSAYTVELGTEVNEFACVVADAVI

1 SEAVEAPLVGTPVCINGLMLEIKDTEKYCALAPNMMVTNNTFTLKGGAPTKVTFGDDTVIEVQGYKSVNITFELDERIDKVLNEKCSAYTVELGTEVNEFACVVADAVI 880  
2 SEAVEAPLVGTPVCINGLMLEIKDTEKYCALAPNMMVTNNTFTLKGGAPTKVTFGDDTVIEVQGYKSVNITFELDERIDKVLNEKCSAYTVELGTEVNEFACVVADAVI 880  
3 SEAVEAPLVGTPVCINGLMLEIKDTEKYCALAPNMMVTNNTFTLKGGAPTKVTFGDDTVIEVQGYKSVNITFELDERIDKVLNEKCSAYTVELGTEVNEFACVVADAVI 880

KTLQPVSELLTPLGIDLDEWSMATYYLFDESGEFKLASHMYCSFYPPDEDEEEGDCEEEEFEPSTQYEYGTEDDYQGKPLEFGATSAALQPEEEQEEDWLDDDSQQTVGQ

1 KTLQPVSELLTPLGIDLDEWSMATYYLFDESGEFKLASHMYCSFYPPDEDEEEGDCEEEEFEPSTQYEYGTEDDYQGKPLEFGATSAALQPEEEQEEDWLDDDSQQTVGQ 990  
2 KTLQPVSELLTPLGIDLDEWSMATYYLFDESGEFKLASHMYCSFYPPDEDEEEGDCEEEEFEPSTQYEYGTEDDYQGKPLEFGATSAALQPEEEQEEDWLDDDSQQTVGQ 990  
3 KTLQPVSELLTPLGIDLDEWSMATYYLFDESGEFKLASHMYCSFYPPDEDEEEGDCEEEEFEPSTQYEYGTEDDYQGKPLEFGATSAALQPEEEQEEDWLDDDSQQTVGQ 990

QDGSEDNQTTTQTIVEVQPQLEMELTPVVQTIEVNSFSGYLKLTDNVYIKNADIVEEAKKVKPTVVVNAANVYLKHGGGVAGALNKATNNAMQVESDDYIATNGPLKVG

1 QDGSEDNQTTTQTIVEVQPQLEMELTPVVQTIEVNSFSGYLKLTDNVYIKNADIVEEAKKVKPTVVVNAANVYLKHGGGVAGALNKATNNAMQVESDDYIATNGPLKVG 1100  
2 QDGSEDNQTTTQTIVEVQPQLEMELTPVVQTIEVNSFSGYLKLTDNVYIKNADIVEEAKKVKPTVVVNAANVYLKHGGGVAGALNKATNNAMQVESDDYIATNGPLKVG 1100  
3 QDGSEDNQTTTQTIVEVQPQLEMELTPVVQTIEVNSFSGYLKLTDNVYIKNADIVEEAKKVKPTVVVNAANVYLKHGGGVAGALNKATNNAMQVESDDYIATNGPLKVG 1100

GSCVLSGHNLAHKHCLHVGPVNVKGEDIQLLKSAYENFNQHEVLLAPLLSAGIFGADPIHSLRVCVDTVRTNVYLA VFDKNLYDKLVSSFLEMKSEKQVEQKIAEIPKEE

1 GSCVLSGHNLAHKHCLHVGPVNVKGEDIQLLKSAYENFNQHEVLLAPLLSAGIFGADPIHSLRVCVDTVRTNVYLA VFDKNLYDKLVSSFLEMKSEKQVEQKIAEIPKEE 1210  
2 GSCVLSGHNLAHKHCLHVGPVNVKGEDIQLLKSAYENFNQHEVLLAPLLSAGIFGADPIHSLRVCVDTVRTNVYLA VFDKNLYDKLVSSFLEMKSEKQVEQKIAEIPKEE 1210  
3 GSCVLSGHNLAHKHCLHVGPVNVKGEDIQLLKSAYENFNQHEVLLAPLLSAGIFGADPIHSLRVCVDTVRTNVYLA VFDKNLYDKLVSSFLEMKSEKQVEQKIAEIPKEE 1210

VKPFITESKPSVEQRKQDDKKIKACVEEVTTTLEETKFLTENLLLYIDINGNLHPDSATLVSDIDITFLKKDAPYIVGDVVQEGVLTAVVIPTKKAGGTTEMLAKALRKV

1 VKPFITESKPSVEQRKQDDKKIKACVEEVTTTLEETKFLTENLLLYIDINGNLHPDSATLVSDIDITFLKKDAPYIVGDVVQEGVLTAVVIPTKKAGGTTEMLAKALRKV 1320  
2 VKPFITESKPSVEQRKQDDKKIKACVEEVTTTLEETKFLTENLLLYIDINGNLHPDSATLVSDIDITFLKKDAPYIVGDVVQEGVLTAVVIPTKKAGGTTEMLAKALRKV 1320  
3 VKPFITESKPSVEQRKQDDKKIKACVEEVTTTLEETKFLTENLLLYIDINGNLHPDSATLVSDIDITFLKKDAPYIVGDVVQEGVLTAVVIPTKKAGGTTEMLAKALRKV 1320



PTDNYITTPGQGLNGYTVEEAKTVLKKCKSAFYILPSIISNEKQEILGTVSWNLREMLAHAEETRKLMPVCVETKAIVSTIQRKYKGIKIQEGVVDYGARFYFYTSKTT

1 PTDNYITTPGQGLNGYTVEEAKTVLKKCKSAFYILPSIISNEKQEILGTVSWNLREMLAHAEETRKLMPVCVETKAIVSTIQRKYKGIKIQEGVVDYGARFYFYTSKTT 1430

2 PTDNYITTPGQGLNGYTVEEAKTVLKKCKSAFYILPSIISNEKQEILGTVSWNLREMLAHAEETRKLMPVCVETKAIVSTIQRKYKGIKIQEGVVDYGARFYFYTSKTT 1430

3 PTDNYITTPGQGLNGYTVEEAKTVLKKCKSAFYILPSIISNEKQEILGTVSWNLREMLAHAEETRKLMPVCVETKAIVSTIQRKYKGIKIQEGVVDYGARFYFYTSKTT 1430

VASLINTLNDLNETLVTMPLGYVTHGLNLEEAARYMRSCLKVPATVSVSSPDAVTAYNGYLTSSSKTPEEHFIETISLAGSYKDSYSGQSTQLGIEFLKRGDKSVYYTSN

1 VASLINTLNDLNETLVTMPLGYVTHGLNLEEAARYMRSCLKVPATVSVSSPDAVTAYNGYLTSSSKTPEEHFIETISLAGSYKDSYSGQSTQLGIEFLKRGDKSVYYTSN 1540

2 VASLINTLNDLNETLVTMPLGYVTHGLNLEEAARYMRSCLKVPATVSVSSPDAVTAYNGYLTSSSKTPEEHFIETISLAGSYKDSYSGQSTQLGIEFLKRGDKSVYYTSN 1540

3 VASLINTLNDLNETLVTMPLGYVTHGLNLEEAARYMRSCLKVPATVSVSSPDAVTAYNGYLTSSSKTPEEHFIETISLAGSYKDSYSGQSTQLGIEFLKRGDKSVYYTSN 1540

PTTFHLDGEVITFDNLKTLLSLREVRTIKVFTTVDNINLHTQVVDMSMTYGQQFGPTYLDGADVTKIKPHNSHEGKTFYVLPNDDTLRVEAFEYHYHTDPSFLGRYMSAL

1 PTTFHLDGEVITFDNLKTLLSLREVRTIKVFTTVDNINLHTQVVDMSMTYGQQFGPTYLDGADVTKIKPHNSHEGKTFYVLPNDDTLRVEAFEYHYHTDPSFLGRYMSAL 1650

2 PTTFHLDGEVITFDNLKTLLSLREVRTIKVFTTVDNINLHTQVVDMSMTYGQQFGPTYLDGADVTKIKPHNSHEGKTFYVLPNDDTLRVEAFEYHYHTDPSFLGRYMSAL 1650

3 PTTFHLDGEVITFDNLKTLLSLREVRTIKVFTTVDNINLHTQVVDMSMTYGQQFGPTYLDGADVTKIKPHNSHEGKTFYVLPNDDTLRVEAFEYHYHTDPSFLGRYMSAL 1650

NHTKKWKYPQVNGLTSIKWADNNCYLATALLTLQQIELKFNPALQDAYYRARAGEAANFCALILAYCNKTVGELGDVRETMSYLFQHANLDSCKRVLNVVCKTCGQQQT

1 NHTKKWKYPQVNGLTSIKWADNNCYLATALLTLQQIELKFNPALQDAYYRARAGEAANFCALILAYCNKTVGELGDVRETMSYLFQHANLDSCKRVLNVVCKTCGQQQT 1760

2 NHTKKWKYPQVNGLTSIKWADNNCYLATALLTLQQIELKFNPALQDAYYRARAGEAANFCALILAYCNKTVGELGDVRETMSYLFQHANLDSCKRVLNVVCKTCGQQQT 1760

3 NHTKKWKYPQVNGLTSIKWADNNCYLATALLTLQQIELKFNPALQDAYYRARAGEAANFCALILAYCNKTVGELGDVRETMSYLFQHANLDSCKRVLNVVCKTCGQQQT 1760

TLKGVEAVMYMGTLSYEQFKKGVQIPCTCGKQATKYLQQESPFVMSAPPAQYELKHGTFTCASEYTGNYQCGHYKHITSKETLYCIDGALLTKSSEYKGPITDVFYKE

1 TLKGVEAVMYMGTLSYEQFKKGVQIPCTCGKQATKYLQQESPFVMSAPPAQYELKHGTFTCASEYTGNYQCGHYKHITSKETLYCIDGALLTKSSEYKGPITDVFYKE 1870  
2 TLKGVEAVMYMGTLSYEQFKKGVQIPCTCGKQATKYLQQESPFVMSAPPAQYELKHGTFTCASEYTGNYQCGHYKHITSKETLYCIDGALLTKSSEYKGPITDVFYKE 1870  
3 TLKGVEAVMYMGTLSYEQFKKGVQIPCTCGKQATKYLQQESPFVMSAPPAQYELKHGTFTCASEYTGNYQCGHYKHITSKETLYCIDGALLTKSSEYKGPITDVFYKE 1870

NSYTTTIKPVTYKLDGVVCTEIDPKLDNYYKKDNSYFTEQPIDLVPNQYPYNASFDNFKFVCDNIKFADDLNQLTGYKKPASRELKVTFPPDLNGDVVAIDYKHYPSEFK

1 NSYTTTIKPVTYKLDGVVCTEIDPKLDNYYKKDNSYFTEQPIDLVPNQYPYNASFDNFKFVCDNIKFADDLNQLTGYKKPASRELKVTFPPDLNGDVVAIDYKHYPSEFK 1980  
2 NSYTTTIKPVTYKLDGVVCTEIDPKLDNYYKKDNSYFTEQPIDLVPNQYPYNASFDNFKFVCDNIKFADDLNQLTGYKKPASRELKVTFPPDLNGDVVAIDYKHYPSEFK 1980  
3 NSYTTTIKPVTYKLDGVVCTEIDPKLDNYYKKDNSYFTEQPIDLVPNQYPYNASFDNFKFVCDNIKFADDLNQLTGYKKPASRELKVTFPPDLNGDVVAIDYKHYPSEFK 1980

KGAKLLHKPIVWHVNNATNKATYKPNTWCIRCLWSTKPVETSNSFDVLKSEDAQGMDNLACEDLKPVSEEVVENPTIQKDVLECNVKTTEVVGDIILKPANNSLKITEEV

1 KGAKLLHKPIVWHVNNATNKATYKPNTWCIRCLWSTKPVETSNSFDVLKSEDAQGMDNLACEDLKPVSEEVVENPTIQKDVLECNVKTTEVVGDIILKPANNSLKITEEV 2090  
2 KGAKLLHKPIVWHVNNATNKATYKPNTWCIRCLWSTKPVETSNSFDVLKSEDAQGMDNLACEDLKPVSEEVVENPTIQKDVLECNVKTTEVVGDIILKPANNSLKITEEV 2090  
3 KGAKLLHKPIVWHVNNATNKATYKPNTWCIRCLWSTKPVETSNSFDVLKSEDAQGMDNLACEDLKPVSEEVVENPTIQKDVLECNVKTTEVVGDIILKPANNSLKITEEV 2090

GHTDLMAAYVDNSSLTIKKPNELSRVLGLKTLATHGLAAVNSVPWDTIANYAKPFLNKVVSTTTNIVTRCLNRVCTNYMPYFFTLQLCTFTRSTNSRIKASMPPTIAK

1 GHTDLMAAYVDNSSLTIKKPNELSRVLGLKTLATHGLAAVNSVPWDTIANYAKPFLNKVVSTTTNIVTRCLNRVCTNYMPYFFTLQLCTFTRSTNSRIKASMPPTIAK 2200  
2 GHTDLMAAYVDNSSLTIKKPNELSRVLGLKTLATHGLAAVNSVPWDTIANYAKPFLNKVVSTTTNIVTRCLNRVCTNYMPYFFTLQLCTFTRSTNSRIKASMPPTIAK 2200  
3 GHTDLMAAYVDNSSLTIKKPNELSRVLGLKTLATHGLAAVNSVPWDTIANYAKPFLNKVVSTTTNIVTRCLNRVCTNYMPYFFTLQLCTFTRSTNSRIKASMPPTIAK 2200



NTVKS VGKFCLEASFNYLKSPNFSKLINIIWFLLLSVCLGSLIYSTAALGVLM SNLGMPSYCTGYREGYLNSTNVTIATYCTGSIPCSVCLSGLD SLD TYPSLETIQIT

1 NTVKS VGKFCLEASFNYLKSPNFSKLINIIWFLLLSVCLGSLIYSTAALGVLM SNLGMPSYCTGYREGYLNSTNVTIATYCTGSIPCSVCLSGLD SLD TYPSLETIQIT 2310

2 NTVKS VGKFCLEASFNYLKSPNFSKLINIIWFLLLSVCLGSLIYSTAALGVLM SNLGMPSYCTGYREGYLNSTNVTIATYCTGSIPCSVCLSGLD SLD TYPSLETIQIT 2310

3 NTVKS VGKFCLEASFNYLKSPNFSKLINIIWFLLLSVCLGSLIYSTAALGVLM SNLGMPSYCTGYREGYLNSTNVTIATYCTGSIPCSVCLSGLD SLD TYPSLETIQIT 2310

ISSFKWDLTAFGLVAEWFLAYILFTRFFYVLGLAATMQLFFSYFAVHFISNSWLMWLIINLVQMAPISAMVRMYIFFASFYYVWKS YVHVVDGCNSSTCMMCYKRNRATR

1 ISSFKWDLTAFGLVAEWFLAYILFTRFFYVLGLAATMQLFFSYFAVHFISNSWLMWLIINLVQMAPISAMVRMYIFFASFYYVWKS YVHVVDGCNSSTCMMCYKRNRATR 2420

2 ISSFKWDLTAFGLVAEWFLAYILFTRFFYVLGLAATMQLFFSYFAVHFISNSWLMWLIINLVQMAPISAMVRMYIFFASFYYVWKS YVHVVDGCNSSTCMMCYKRNRATR 2420

3 ISSFKWDLTAFGLVAEWFLAYILFTRFFYVLGLAATMQLFFSYFAVHFISNSWLMWLIINLVQMAPISAMVRMYIFFASFYYVWKS YVHVVDGCNSSTCMMCYKRNRATR 2420

VECTTIVNGVRRSFYVYANGGKGFCCLHNWNCVNCDTFCAGSTFISDEVARDLSLQFKRPINPTDQSSYIVDSVTVKNGSIHLYFDKAGQKTYERHSLSHFVNLDNLRAN

1 VECTTIVNGVRRSFYVYANGGKGFCCLHNWNCVNCDTFCAGSTFISDEVARDLSLQFKRPINPTDQSSYIVDSVTVKNGSIHLYFDKAGQKTYERHSLSHFVNLDNLRAN 2530

2 VECTTIVNGVRRSFYVYANGGKGFCCLHNWNCVNCDTFCAGSTFISDEVARDLSLQFKRPINPTDQSSYIVDSVTVKNGSIHLYFDKAGQKTYERHSLSHFVNLDNLRAN 2530

3 VECTTIVNGVRRSFYVYANGGKGFCCLHNWNCVNCDTFCAGSTFISDEVARDLSLQFKRPINPTDQSSYIVDSVTVKNGSIHLYFDKAGQKTYERHSLSHFVNLDNLRAN 2530

NTKGSLPINVIVFDGKSKCEESSAKSASVYYSQLMCQPILLDDQALVSDVGDSA EVAVKMF DAYVNTFSSTFNVPMEK LKTLVATAEAE LAKNVSLDNVLSTFISAARQG

1 NTKGSLPINVIVFDGKSKCEESSAKSASVYYSQLMCQPILLDDQALVSDVGDSA EVAVKMF DAYVNTFSSTFNVPMEK LKTLVATAEAE LAKNVSLDNVLSTFISAARQG 2640

2 NTKGSLPINVIVFDGKSKCEESSAKSASVYYSQLMCQPILLDDQALVSDVGDSA EVAVKMF DAYVNTFSSTFNVPMEK LKTLVATAEAE LAKNVSLDNVLSTFISAARQG 2640

3 NTKGSLPINVIVFDGKSKCEESSAKSASVYYSQLMCQPILLDDQALVSDVGDSA EVAVKMF DAYVNTFSSTFNVPMEK LKTLVATAEAE LAKNVSLDNVLSTFISAARQG 2640

FVDSDEVTKDVVECLKLSHQSDIEVTGDSNNYMLTYNKVENMTPRDLGACIDCSARHINAQVAKSHNIALIWNVKDFMSLSEQLRKQIRSAAKNNLPFKLTCATTRQV

1 FVDSDEVTKDVVECLKLSHQSDIEVTGDSNNYMLTYNKVENMTPRDLGACIDCSARHINAQVAKSHNIALIWNVKDFMSLSEQLRKQIRSAAKNNLPFKLTCATTRQV 2750  
2 FVDSDEVTKDVVECLKLSHQSDIEVTGDSNNYMLTYNKVENMTPRDLGACIDCSARHINAQVAKSHNIALIWNVKDFMSLSEQLRKQIRSAAKNNLPFKLTCATTRQV 2750  
3 FVDSDEVTKDVVECLKLSHQSDIEVTGDSNNYMLTYNKVENMTPRDLGACIDCSARHINAQVAKSHNIALIWNVKDFMSLSEQLRKQIRSAAKNNLPFKLTCATTRQV 2750

VNVVTTKIALKGGKIVNNWLKQLIKVTLVFLFVAAIFYLITPVHVMSKHTDFSSEIIGYKAIDGGVTRDIASDTCTCFANKHADFDTWFSQRGGSYTNDKACPLIAAVITR

1 VNVVTTKIALKGGKIVNNWLKQLIKVTLVFLFVAAIFYLITPVHVMSKHTDFSSEIIGYKAIDGGVTRDIASDTCTCFANKHADFDTWFSQRGGSYTNDKACPLIAAVITR 2860  
2 VNVVTTKIALKGGKIVNNWLKQLIKVTLVFLFVAAIFYLITPVHVMSKHTDFSSEIIGYKAIDGGVTRDIASDTCTCFANKHADFDTWFSQRGGSYTNDKACPLIAAVITR 2860  
3 VNVVTTKIALKGGKIVNNWLKQLIKVTLVFLFVAAIFYLITPVHVMSKHTDFSSEIIGYKAIDGGVTRDIASDTCTCFANKHADFDTWFSQRGGSYTNDKACPLIAAVITR 2860

EVGFVVPGLPGTILRTTNGDFLHFLPRVFSAVGNICYTPSKLIEYTDFAVSACVLAAECTIFKDASGKVPYCYDTNVLEGSVAYESLRPDTRYVLMDGSIQFPNTYLE

1 EVGFVVPGLPGTILRTTNGDFLHFLPRVFSAVGNICYTPSKLIEYTDFAVSACVLAAECTIFKDASGKVPYCYDTNVLEGSVAYESLRPDTRYVLMDGSIQFPNTYLE 2970  
2 EVGFVVPGLPGTILRTTNGDFLHFLPRVFSAVGNICYTPSKLIEYTDFAVSACVLAAECTIFKDASGKVPYCYDTNVLEGSVAYESLRPDTRYVLMDGSIQFPNTYLE 2970  
3 EVGFVVPGLPGTILRTTNGDFLHFLPRVFSAVGNICYTPSKLIEYTDFAVSACVLAAECTIFKDASGKVPYCYDTNVLEGSVAYESLRPDTRYVLMDGSIQFPNTYLE 2970

GSRVVVTTFDSEYCRHGTCESEAGVCVSTSGRWVLNNDYYRSLPGVFCGVDAVNLLTNMFTPLIQPIGALDISASIVAGGIVAIVVTCLAYYFMRFRRAFGEYSHVVAF

1 GSRVVVTTFDSEYCRHGTCESEAGVCVSTSGRWVLNNDYYRSLPGVFCGVDAVNLLTNMFTPLIQPIGALDISASIVAGGIVAIVVTCLAYYFMRFRRAFGEYSHVVAF 3080  
2 GSRVVVTTFDSEYCRHGTCESEAGVCVSTSGRWVLNNDYYRSLPGVFCGVDAVNLLTNMFTPLIQPIGALDISASIVAGGIVAIVVTCLAYYFMRFRRAFGEYSHVVAF 3080  
3 GSRVVVTTFDSEYCRHGTCESEAGVCVSTSGRWVLNNDYYRSLPGVFCGVDAVNLLTNMFTPLIQPIGALDISASIVAGGIVAIVVTCLAYYFMRFRRAFGEYSHVVAF 3080



NTLLFLMSFTVLCCLTPVYSFLPGVYSVIYLYLTFYLTNDVSFLAHIQWMVMFTPLVPFWITIAIYIICISTKHFYWFFSNYLKRRVVFNGVSFSTFEEAALCTFLLNKEMY

|   |                                                                                                                  |      |
|---|------------------------------------------------------------------------------------------------------------------|------|
| 1 | NTLLFLMSFTVLCCLTPVYSFLPGVYSVIYLYLTFYLTNDVSFLAHIQWMVMFTPLVPFWITIAIYIICISTKHFYWFFSNYLKRRVVFNGVSFSTFEEAALCTFLLNKEMY | 3190 |
| 2 | NTLLFLMSFTVLCCLTPVYSFLPGVYSVIYLYLTFYLTNDVSFLAHIQWMVMFTPLVPFWITIAIYIICISTKHFYWFFSNYLKRRVVFNGVSFSTFEEAALCTFLLNKEMY | 3190 |
| 3 | NTLLFLMSFTVLCCLTPVYSFLPGVYSVIYLYLTFYLTNDVSFLAHIQWMVMFTPLVPFWITIAIYIICISTKHFYWFFSNYLKRRVVFNGVSFSTFEEAALCTFLLNKEMY | 3190 |

LKLRSDVLLPLTQYNRYLALYNKYKYFSGAMDTSYREAAACCHLAKALNDFSNSGSDVLYQPPQTSITSAVLQSGFRKMAFPSGKVEGCMVQVTCGTTTLNGLWLDVVY

|   |                                                                                                               |      |
|---|---------------------------------------------------------------------------------------------------------------|------|
| 1 | LKLRSDVLLPLTQYNRYLALYNKYKYFSGAMDTSYREAAACCHLAKALNDFSNSGSDVLYQPPQTSITSAVLQSGFRKMAFPSGKVEGCMVQVTCGTTTLNGLWLDVVY | 3300 |
| 2 | LKLRSDVLLPLTQYNRYLALYNKYKYFSGAMDTSYREAAACCHLAKALNDFSNSGSDVLYQPPQTSITSAVLQSGFRKMAFPSGKVEGCMVQVTCGTTTLNGLWLDVVY | 3300 |
| 3 | LKLRSDVLLPLTQYNRYLALYNKYKYFSGAMDTSYREAAACCHLAKALNDFSNSGSDVLYQPPQTSITSAVLQSGFRKMAFPSGKVEGCMVQVTCGTTTLNGLWLDVVY | 3300 |

CPRHVICTSEDMLNPNYEDLLIRKSNHNFLVQAGNVQLRVIGHSMQNCVLKLVDTANPKTPKYKFVRIQPGQTFSVLACYNGSPSGVYQCAMRPNFTIKGSFLNGSCGS

|   |                                                                                                               |      |
|---|---------------------------------------------------------------------------------------------------------------|------|
| 1 | CPRHVICTSEDMLNPNYEDLLIRKSNHNFLVQAGNVQLRVIGHSMQNCVLKLVDTANPKTPKYKFVRIQPGQTFSVLACYNGSPSGVYQCAMRPNFTIKGSFLNGSCGS | 3410 |
| 2 | CPRHVICTSEDMLNPNYEDLLIRKSNHNFLVQAGNVQLRVIGHSMQNCVLKLVDTANPKTPKYKFVRIQPGQTFSVLACYNGSPSGVYQCAMRPNFTIKGSFLNGSCGS | 3410 |
| 3 | CPRHVICTSEDMLNPNYEDLLIRKSNHNFLVQAGNVQLRVIGHSMQNCVLKLVDTANPKTPKYKFVRIQPGQTFSVLACYNGSPSGVYQCAMRPNFTIKGSFLNGSCGS | 3410 |

VGFNIDYDCVSFCYMHMELPTGVHAGTDLEGNFYGPFVDRQTAQAAGDTTITVNVLAWLYAAVINGDRWFLNRFTTTLNDFNLVAMKYNYEPLTQDHVDILGPLSAQT

|   |                                                                                                              |      |
|---|--------------------------------------------------------------------------------------------------------------|------|
| 1 | VGFNIDYDCVSFCYMHMELPTGVHAGTDLEGNFYGPFVDRQTAQAAGDTTITVNVLAWLYAAVINGDRWFLNRFTTTLNDFNLVAMKYNYEPLTQDHVDILGPLSAQT | 3520 |
| 2 | VGFNIDYDCVSFCYMHMELPTGVHAGTDLEGNFYGPFVDRQTAQAAGDTTITVNVLAWLYAAVINGDRWFLNRFTTTLNDFNLVAMKYNYEPLTQDHVDILGPLSAQT | 3520 |
| 3 | VGFNIDYDCVSFCYMHMELPTGVHAGTDLEGNFYGPFVDRQTAQAAGDTTITVNVLAWLYAAVINGDRWFLNRFTTTLNDFNLVAMKYNYEPLTQDHVDILGPLSAQT | 3520 |

GI AVLDMCASLKELLQNGMNGRTILGSALLEDEFTPFDVVRQCSGVTFQSAVKRTIKGTHHWLLLTILTSLLVLVQSTQWSLFFFLYENAFLPFAMGIIAMSAFAMMFVK

GI AVLDMCASLKELLQNGMNGRTILGSALLEDEFTPFDVVRQCSGVTFQSAVKRTIKGTQHWLLLTILTSLLVLVQSTQWSLFFFLYENAFLPFAMGIIAMSAFAMMFVK 3630

GI AVLDMCASLKELLQNGMNGRTILGSALLEDEFTPFDVVRQCSGVTFQSAVKRTIKGTHHWLLLTILTSLLVLVQSTQWSLFFFLYENAFLPFAMGIIAMSAFAMMFVK 3630

GI AVLDMCASLKELLQNGMNGRTILGSALLEDEFTPFDVVRQCSGVTFQSAVKRTIKGTHHWLLLTILTSLLVLVQSTQWSLFFFLYENAFLPFAMGIIAMSAFAMMFVK 3630

HKHAFCLCLFLLPSLATVAYFNMVMPASWVMRIMTWLDMVDTSLSGFKLKDCVMYASAVVLLILMTARTVYDDGARRVWTL MNVLT LVYKVYYGNALDQAISMWALIISV

HKHAFCLCLFLLPSLATVAYFNMVMPASWVMRIMTWLDMVDTSLSGFKLKDCVMYASAVVLLILMTARTVYDDGARRVWTL MNVLT LVYKVYYGNALDQAISMWALIISV 3740

HKHAFCLCLFLLPSLATVAYFNMVMPASWVMRIMTWLDMVDTSLSGFKLKDCVMYASAVVLLILMTARTVYDDGARRVWTL MNVLT LVYKVYYGNALDQAISMWALIISV 3737

HKHAFCLCLFLLPSLATVAYFNMVMPASWVMRIMTWLDMVDTSLSGFKLKDCVMYASAVVLLILMTARTVYDDGARRVWTL MNVLT LVYKVYYGNALDQAISMWALIISV 3740

TSNYSGVVTTVMFLARGIVFMCVEYCPPIFFITGNTLQCI MLVYCF LGYFCTCYFGLFCLLNRYFRLTLGVYDYL VSTQEF RYMNSQGLLPPKNSIDAFKLN IKLLGVGGK

TSNYSGVVTTVMFLARGIVFMCVEYCPPIFFITGNTLQCI MLVYCF LGYFCTCYFGLFCLLNRYFRLTLGVYDYL VSTQEF RYMNSQGLLPPKNSIDAFKLN IKLLGVGGK 3850

TSNYSGVVTTVMFLARGIVFMCVEYCPPIFFITGNTLQCI MLVYCF LGYFCTCYFGLFCLLNRYFRLTLGVYDYL VSTQEF RYMNSQGLLPPKNSIDAFKLN IKLLGVGGK 3847

TSNYSGVVTTVMFLARGIVFMCVEYCPPIFFITGNTLQCI MLVYCF LGYFCTCYFGLFCLLNRYFRLTLGVYDYL VSTQEF RYMNSQGLLPPKNSIDAFKLN IKLLGVGGK 3850

PCIKVATVQSKMSDVKCTSVVLLSVLQQLRVESSSKLWAQCVQLHNDILLAKDTTEAFEKMSVLLSVLLSMQGAVDINKLCEEMLDNRATLQAIASEFSSLPSYAAFATA

PCIKVATVQSKMSDVKCTSVVLLSVLQQLRVESSSKLWAQCVQLHNDILLAKDTTEAFEKMSVLLSVLLSMQGAVDINKLCEEMLDNRATLQAIASEFSSLPSYAAFATA 3960

PCIKVATVQSKMSDVKCTSVVLLSVLQQLRVESSSKLWAQCVQLHNDILLAKDTTEAFEKMSVLLSVLLSMQGAVDINKLCEEMLDNRATLQAIASEFSSLPSYAAFATA 3957

PCIKVATVQSKMSDVKCTSVVLLSVLQQLRVESSSKLWAQCVQLHNDILLAKDTTEAFEKMSVLLSVLLSMQGAVDINKLCEEMLDNRATLQAIASEFSSLPSYAAFATA 3960



QEAYEQAVANGDSEVVLKKLKKSLNVAKSEFDRDAAMQRKLEKMAHQAMTQMYKQARSEDKRAKVTSAMQTMFTMLRKLDNDALNNIINNARDGCVPLNIPLTTAAKL

|   |                                                                                                              |      |
|---|--------------------------------------------------------------------------------------------------------------|------|
| 1 | QEAYEQAVANGDSEVVLKKLKKSLNVAKSEFDRDAAMQRKLEKMAHQAMTQMYKQARSEDKRAKVTSAMQTMFTMLRKLDNDALNNIINNARDGCVPLNIPLTTAAKL | 4070 |
| 2 | QEAYEQAVANGDSEVVLKKLKKSLNVAKSEFDRDAAMQRKLEKMAHQAMTQMYKQARSEDKRAKVTSAMQTMFTMLRKLDNDALNNIINNARDGCVPLNIPLTTAAKL | 4067 |
| 3 | QEAYEQAVANGDSEVVLKKLKKSLNVAKSEFDRDAAMQRKLEKMAHQAMTQMYKQARSEDKRAKVTSAMQTMFTMLRKLDNDALNNIINNARDGCVPLNIPLTTAAKL | 4070 |

MVVIPDYNTYKNTCDGTTFTYASALWEIQVVDADSKIVQLSEISMDNSPNLAWPLIVTALRANSVAVKLQNNELSPVALRQMSCAAGTTQTACTDDNALAYYNTTKGGRF

|   |                                                                                                                |      |
|---|----------------------------------------------------------------------------------------------------------------|------|
| 1 | MVVIPDYNTYKNTCDGTTFTYASALWEIQVVDADSKIVQLSEISMDNSPNLAWPLIVTALRANSVAVKLQNNELSPVALRQMSCAAGTTQTACTDDNALAYYNTTKGGRF | 4180 |
| 2 | MVVIPDYNTYKNTCDGTTFTYASALWEIQVVDADSKIVQLSEISMDNSPNLAWPLIVTALRANSVAVKLQNNELSPVALRQMSCAAGTTQTACTDDNALAYYNTTKGGRF | 4177 |
| 3 | MVVIPDYNTYKNTCDGTTFTYASALWEIQVVDADSKIVQLSEISMDNSPNLAWPLIVTALRANSVAVKLQNNELSPVALRQMSCAAGTTQTACTDDNALAYYNTTKGGRF | 4180 |

VLALLSDLQDLKWARFPKSDGTGTIYTELEPPCRFVTDTPKGPVKYLYFIKGLNNLNRGMVLGSLAATVRLQAGNATEVPANSTVLSFCAFAVDAAKAYKDYLASGGQP

|   |                                                                                                               |      |
|---|---------------------------------------------------------------------------------------------------------------|------|
| 1 | VLALLSDLQDLKWARFPKSDGTGTIYTELEPPCRFVTDTPKGPVKYLYFIKGLNNLNRGMVLGSLAATVRLQAGNATEVPANSTVLSFCAFAVDAAKAYKDYLASGGQP | 4290 |
| 2 | VLALLSDLQDLKWARFPKSDGTGTIYTELEPPCRFVTDTPKGPVKYLYFIKGLNNLNRGMVLGSLAATVRLQAGNATEVPANSTVLSFCAFAVDAAKAYKDYLASGGQP | 4287 |
| 3 | VLALLSDLQDLKWARFPKSDGTGTIYTELEPPCRFVTDTPKGPVKYLYFIKGLNNLNRGMVLGSLAATVRLQAGNATEVPANSTVLSFCAFAVDAAKAYKDYLASGGQP | 4290 |

ITNCVKMLCTHTGTGQAITVTPEANMDQESFGGASCCLYCRCHIDHPNPKGFCDLKGKYVQIPTTCANDPVGFLLKNTVCTVCGMWKGYGCSCDQLREPMLQSADAQSFL

|   |                                                                                                                |      |
|---|----------------------------------------------------------------------------------------------------------------|------|
| 1 | ITNCVKMLCTHTGTGQAITVTPEANMDQESFGGASCCLYCRCHIDHPNPKGFCDLKGKYVQIPTTCANDPVGFLLKNTVCTVCGMWKGYGCSCDQLREPMLQSADAQSFL | 4400 |
| 2 | ITNCVKMLCTHTGTGQAITVTPEANMDQESFGGASCCLYCRCHIDHPNPKGFCDLKGKYVQIPTTCANDPVGFLLKNTVCTVCGMWKGYGCSCDQLREPMLQSADAQSFL | 4397 |
| 3 | ITNCVKMLCTHTGTGQAITVTPEANMDQESFGGASCCLYCRCHIDHPNPKGFCDLKGKYVQIPTTCANDPVGFLLKNTVCTVCGMWKGYGCSCDQLREPMLQSADAQSFL | 4400 |

NRVCGVSAARLTPCGTGTSTDVVYRAFDIYNDKVAGFAKFLKTNCCRFQEKDEDDNLIDSYFVVKRHTFSNYQHEETIYNLLKDCPAVAKHDFKFRIDGDMVPHISRQR

1 NRVCGVSAARLTPCGTGTSTDVVYRAFDIYNDKVAGFAKFLKTNCCRFQEKDEDDNLIDSYFVVKRHTFSNYQHEETIYNLLKDCPAVAKHDFKFRIDGDMVPHISRQR 4510  
2 NRVCGVSAARLTPCGTGTSTDVVYRAFDIYNDKVAGFAKFLKTNCCRFQEKDEDDNLIDSYFVVKRHTFSNYQHEETIYNLLKDCPAVAKHDFKFRIDGDMVPHISRQR 4507  
3 NRVCGVSAARLTPCGTGTSTDVVYRAFDIYNDKVAGFAKFLKTNCCRFQEKDEDDNLIDSYFVVKRHTFSNYQHEETIYNLLKDCPAVAKHDFKFRIDGDMVPHISRQR 4510

LTKYTMADLVYALRHFDEGNCDTLKEILVTYNCCDDYFNKKDWYDFVENPDILRVYANLGERVRQALLKTVQFCDAMRNAGIVGVLTLDNQDLNGNWYDFGDFIQTTPG

1 LTKYTMADLVYALRHFDEGNCDTLKEILVTYNCCDDYFNKKDWYDFVENPDILRVYANLGERVRQALLKTVQFCDAMRNAGIVGVLTLDNQDLNGNWYDFGDFIQTTPG 4620  
2 LTKYTMADLVYALRHFDEGNCDTLKEILVTYNCCDDYFNKKDWYDFVENPDILRVYANLGERVRQALLKTVQFCDAMRNAGIVGVLTLDNQDLNGNWYDFGDFIQTTPG 4617  
3 LTKYTMADLVYALRHFDEGNCDTLKEILVTYNCCDDYFNKKDWYDFVENPDILRVYANLGERVRQALLKTVQFCDAMRNAGIVGVLTLDNQDLNGNWYDFGDFIQTTPG 4620

SGVPVVD SYYSLLMPILTLTRALTAESHVDTDLTKPYIKWDLKDYDFTEERLKLFD RYFKYWDQTYHPNCVNCLDDRCILHCANFNVLFSTVFPLTSFGPLVRKIFVDGV

1 SGVPVVD SYYSLLMPILTLTRALTAESHVDTDLTKPYIKWDLKDYDFTEERLKLFD RYFKYWDQTYHPNCVNCLDDRCILHCANFNVLFSTVFPLTSFGPLVRKIFVDGV 4730  
2 SGVPVVD SYYSLLMPILTLTRALTAESHVDTDLTKPYIKWDLKDYDFTEERLKLFD RYFKYWDQTYHPNCVNCLDDRCILHCANFNVLFSTVFPLTSFGPLVRKIFVDGV 4727  
3 SGVPVVD SYYSLLMPILTLTRALTAESHVDTDLTKPYIKWDLKDYDFTEERLKLFD RYFKYWDQTYHPNCVNCLDDRCILHCANFNVLFSTVFPLTSFGPLVRKIFVDGV 4730

PFV VSTGYHFRELGVVHNQDVNLHSSRLSFKELLVYAADPAMHAASGNLLLDKRTTCFSVAALTNNVAFQTVKPGNFNKDFYDFAVSKGFFKEGSSVELKHFFFAQDGNA

1 PFV VSTGYHFRELGVVHNQDVNLHSSRLSFKELLVYAADPAMHAASGNLLLDKRTTCFSVAALTNNVAFQTVKPGNFNKDFYDFAVSKGFFKEGSSVELKHFFFAQDGNA 4840  
2 PFV VSTGYHFRELGVVHNQDVNLHSSRLSFKELLVYAADPAMHAASGNLLLDKRTTCFSVAALTNNVAFQTVKPGNFNKDFYDFAVSKGFFKEGSSVELKHFFFAQDGNA 4837  
3 PFV VSTGYHFRELGVVHNQDVNLHSSRLSFKELLVYAADPAMHAASGNLLLDKRTTCFSVAALTNNVAFQTVKPGNFNKDFYDFAVSKGFFKEGSSVELKHFFFAQDGNA 4840



**AISDYDYYRYNLPTMCDIRQLLFVVEVVDKYFDCYDGGCINANQVIVNNLDKSAGFPFNKGKARLYYDSMSYEDQDALFAYTKRNVIPITITQMNLYAISAKNRARTVA**

|   |                                                                                                               |      |
|---|---------------------------------------------------------------------------------------------------------------|------|
| 1 | AISDYDYYRYNLPTMCDIRQLLFVVEVVDKYFDCYDGGCINANQVIVNNLDKSAGFPFNKGKARLYYDSMSYEDQDALFAYTKRNVIPITITQMNLYAISAKNRARTVA | 4950 |
| 2 | AISDYDYYRYNLPTMCDIRQLLFVVEVVDKYFDCYDGGCINANQVIVNNLDKSAGFPFNKGKARLYYDSMSYEDQDALFAYTKRNVIPITITQMNLYAISAKNRARTVA | 4947 |
| 3 | AISDYDYYRYNLPTMCDIRQLLFVVEVVDKYFDCYDGGCINANQVIVNNLDKSAGFPFNKGKARLYYDSMSYEDQDALFAYTKRNVIPITITQMNLYAISAKNRARTVA | 4950 |

**GVSICSTMTNRQFHQKLLKSIAATRGATVVIGTSKFYGGWHNMLKTVYSDVENPHLMGWDYPKCDRAMPNMLRIMASLVLARKHTTCCSLSHRFYRLANCAQVLSEMVM**

|   |                                                                                                               |      |
|---|---------------------------------------------------------------------------------------------------------------|------|
| 1 | GVSICSTMTNRQFHQKLLKSIAATRGATVVIGTSKFYGGWHNMLKTVYSDVENPHLMGWDYPKCDRAMPNMLRIMASLVLARKHTTCCSLSHRFYRLANCAQVLSEMVM | 5060 |
| 2 | GVSICSTMTNRQFHQKLLKSIAATRGATVVIGTSKFYGGWHNMLKTVYSDVENPHLMGWDYPKCDRAMPNMLRIMASLVLARKHTTCCSLSHRFYRLANCAQVLSEMVM | 5057 |
| 3 | GVSICSTMTNRQFHQKLLKSIAATRGATVVIGTSKFYGGWHNMLKTVYSDVENPHLMGWDYPKCDRAMPNMLRIMASLVLARKHTTCCSLSHRFYRLANCAQVLSEMVM | 5060 |

**CGGSLYVKPGGTSSGDATTAYANSVFNICQAVTANVNALLSTDGNKIADKYVRNLQHRLYECLYRNRDVTDFVNEFYAYLRKHFSMMILSDDAVVCFNSTYASQGLVAS**

|   |                                                                                                               |      |
|---|---------------------------------------------------------------------------------------------------------------|------|
| 1 | CGGSLYVKPGGTSSGDATTAYANSVFNICQAVTANVNALLSTDGNKIADKYVRNLQHRLYECLYRNRDVTDFVNEFYAYLRKHFSMMILSDDAVVCFNSTYASQGLVAS | 5170 |
| 2 | CGGSLYVKPGGTSSGDATTAYANSVFNICQAVTANVNALLSTDGNKIADKYVRNLQHRLYECLYRNRDVTDFVNEFYAYLRKHFSMMILSDDAVVCFNSTYASQGLVAS | 5167 |
| 3 | CGGSLYVKPGGTSSGDATTAYANSVFNICQAVTANVNALLSTDGNKIADKYVRNLQHRLYECLYRNRDVTDFVNEFYAYLRKHFSMMILSDDAVVCFNSTYASQGLVAS | 5170 |

**IKNFKSVLYYQNNVMSEAKWTETDLTKGPHEFCSQHTMLVKQGDDYVYLPYPDPSRILGAGCFVDDIVKTDGTLMIERFVSLAIDAYPLTKHPNQEYADVFLYLQYI**

|   |                                                                                                             |      |
|---|-------------------------------------------------------------------------------------------------------------|------|
| 1 | IKNFKSVLYYQNNVMSEAKWTETDLTKGPHEFCSQHTMLVKQGDDYVYLPYPDPSRILGAGCFVDDIVKTDGTLMIERFVSLAIDAYPLTKHPNQEYADVFLYLQYI | 5280 |
| 2 | IKNFKSVLYYQNNVMSEAKWTETDLTKGPHEFCSQHTMLVKQGDDYVYLPYPDPSRILGAGCFVDDIVKTDGTLMIERFVSLAIDAYPLTKHPNQEYADVFLYLQYI | 5277 |
| 3 | IKNFKSVLYYQNNVMSEAKWTETDLTKGPHEFCSQHTMLVKQGDDYVYLPYPDPSRILGAGCFVDDIVKTDGTLMIERFVSLAIDAYPLTKHPNQEYADVFLYLQYI | 5280 |

RKLHDELTGHMLDMYSVMLTNDNTSRYWEPEFYEAMYPHTVLQAVGACVLCNSQTSLRGACIRRPFLCCKCCYDHVISTSHKLVL SVN PYVCNAPGCDVTDVTQLYLG

|   |                                                                                                                |      |
|---|----------------------------------------------------------------------------------------------------------------|------|
| 1 | RKLHDELTGHMLDMYSVMLTNDNTSRYWEPEFYEAMYPHTVLQAVGACVLCNSQTSLRGACIRRPFLCCKCCYDHVISTSHKLVL SVN PYVCNAPGCDVTDVTQLYLG | 5390 |
| 2 | RKLHDELTGHMLDMYSVMLTNDNTSRYWEPEFYEAMYPHTVLQAVGACVLCNSQTSLRGACIRRPFLCCKCCYDHVISTSHKLVL SVN PYVCNAPGCDVTDVTQLYLG | 5387 |
| 3 | RKLHDELTGHMLDMYSVMLTNDNTSRYWEPEFYEAMYPHTVLQAVGACVLCNSQTSLRGACIRRPFLCCKCCYDHVISTSHKLVL SVN PYVCNAPGCDVTDVTQLYLG | 5390 |

GMSYYCKSHKPPISFPLCANGQVFGLYKNTCVGSDNVTD FNAIATCDWTNAGDYILANTCTERLKLFAAETLKATEETFKLSYGIATVREVLS DRELHLSWEVGKPRPPL

|   |                                                                                                                  |      |
|---|------------------------------------------------------------------------------------------------------------------|------|
| 1 | GMSYYCKSHKPPISFPLCANGQVFGLYKNTCVGSDNVTD FNAIATCDWTNAGDYILANTCTERLKLFAAETLKATEETFKLSYGIATVREVLS DRELHLSWEVGKPRPPL | 5500 |
| 2 | GMSYYCKSHKPPISFPLCANGQVFGLYKNTCVGSDNVTD FNAIATCDWTNAGDYILANTCTERLKLFAAETLKATEETFKLSYGIATVREVLS DRELHLSWEVGKPRPPL | 5497 |
| 3 | GMSYYCKSHKPPISFPLCANGQVFGLYKNTCVGSDNVTD FNAIATCDWTNAGDYILANTCTERLKLFAAETLKATEETFKLSYGIATVREVLS DRELHLSWEVGKPRPPL | 5500 |

NRNYVFTGYRVTKNSKVQIGEYTFEKG DYGD AVVYRGTTTYKLNVDYFVLTSHTVMPLSAPTLVPQEHYVRITGLYPTLNISDEFSSNVANYQKVGMQKYSTLQGPPGT

|   |                                                                                                                 |      |
|---|-----------------------------------------------------------------------------------------------------------------|------|
| 1 | NRNYVFTGYRVTKNSKVQIGEYTFEKG DYGD AVVYRGTTTYKLNVDYFVLTSHTVMPLSAPTLVPQEHYVRITGLYPTLNISDEFSSNVANYQKVGMQKYSTLQGPPGT | 5610 |
| 2 | NRNYVFTGYRVTKNSKVQIGEYTFEKG DYGD AVVYRGTTTYKLNVDYFVLTSHTVMPLSAPTLVPQEHYVRITGLYPTLNISDEFSSNVANYQKVGMQKYSTLQGPPGT | 5607 |
| 3 | NRNYVFTGYRVTKNSKVQIGEYTFEKG DYGD AVVYRGTTTYKLNVDYFVLTSHTVMPLSAPTLVPQEHYVRITGLYPTLNISDEFSSNVANYQKVGMQKYSTLQGPPGT | 5610 |

GKSHFAIGLALYYPSARIVYTACSHA AVDALCEKALKYLPIDKCSRIIPARARVECFDKFKVNSTLEQYVFCTVNALPETTADIVVFDEISMATNYDLSVVNARLRAKHY

|   |                                                                                                                 |      |
|---|-----------------------------------------------------------------------------------------------------------------|------|
| 1 | GKSHFAIGLALYYPSARIVYTACSHA AVDALCEKALKYLPIDKCSRIIPARARVECFDKFKVNSTLEQYVFCTVNALPETTADIVVFDEISMATNYDLSVVNARLRAKHY | 5720 |
| 2 | GKSHFAIGLALYYPSARIVYTACSHA AVDALCEKALKYLPIDKCSRIIPARARVECFDKFKVNSTLEQYVFCTVNALPETTADIVVFDEISMATNYDLSVVNARLRAKHY | 5717 |
| 3 | GKSHFAIGLALYYPSARIVYTACSHA AVDALCEKALKYLPIDKCSRIIPARARVECFDKFKVNSTLEQYVFCTVNALPETTADIVVFDEISMATNYDLSVVNARLRAKHY | 5720 |



VYIGDPAQLPAPRTLLTKGTLEPEYFNSVCRLMKTIGPDMFLGTCRRCPAEIVDTVSA LVYDNKLKAHKDKSAQCFKMFYKGVITHDVSSAINRPQIGVVREFLTRNPAW

|   |                                                                                                                 |      |
|---|-----------------------------------------------------------------------------------------------------------------|------|
| 1 | VYIGDPAQLPAPRTLLTKGTLEPEYFNSVCRLMKTIGPDMFLGTCRRCPAEIVDTVSA LVYDNKLKAHKDKSAQCFKMFYKGVITHDVSSAINRPQIGVVREFLTRNPAW | 5830 |
| 2 | VYIGDPAQLPAPRTLLTKGTLEPEYFNSVCRLMKTIGPDMFLGTCRRCPAEIVDTVSA LVYDNKLKAHKDKSAQCFKMFYKGVITHDVSSAINRPQIGVVREFLTRNPAW | 5827 |
| 3 | VYIGDPAQLPAPRTLLTKGTLEPEYFNSVCRLMKTIGPDMFLGTCRRCPAEIVDTVSA LVYDNKLKAHKDKSAQCFKMFYKGVITHDVSSAINRPQIGVVREFLTRNPAW | 5830 |

RKAVFISPYNSQNAVASKILGLPTQTV DSSQGSEYDYVIFTQTTETAHSCNVNRFNVAITRAKVGILCIMS DRDLYDKLQFTSLEIPRRNVATLQAENV TGLFKDCSKVI

|   |                                                                                                                   |      |
|---|-------------------------------------------------------------------------------------------------------------------|------|
| 1 | RKAVFISPYNSQNAVASKILGLPTQTV DSSQGSEYDYVIFTQTTETAHSCNVNRFNVAITRAKVGILCIMS DRDLYDKLQFTSLEIPRRNVATLQAENV TGLFKDCSKVI | 5940 |
| 2 | RKAVFISPYNSQNAVASKILGLPTQTV DSSQGSEYDYVIFTQTTETAHSCNVNRFNVAITRAKVGILCIMS DRDLYDKLQFTSLEIPRRNVATLQAENV TGLFKDCSKVI | 5937 |
| 3 | RKAVFISPYNSQNAVASKILGLPTQTV DSSQGSEYDYVIFTQTTETAHSCNVNRFNVAITRAKVGILCIMS DRDLYDKLQFTSLEIPRRNVATLQAENV TGLFKDCSKVI | 5940 |

TGLHPTQAPTHLSVDTKFKTEGLCVDIPGIPKDMTYRRLISMMGFKMNYQVNGYPNMFITREEAIRHVRAWIGFDVEGCHATREAVGTNLPLQLGFSTGVNLVAVPTGYV

|   |                                                                                                                |      |
|---|----------------------------------------------------------------------------------------------------------------|------|
| 1 | TGLHPTQAPTHLSVDTKFKTEGLCVDIPGIPKDMTYRRLISMMGFKMNYQVNGYPNMFITREEAIRHVRAWIGFDVEGCHATREAVGTNLPLQLGFSTGVNLVAVPTGYV | 6050 |
| 2 | TGLHPTQAPTHLSVDTKFKTEGLCVDIPGIPKDMTYRRLISMMGFKMNYQVNGYPNMFITREEAIRHVRAWIGFDVEGCHATREAVGTNLPLQLGFSTGVNLVAVPTGYV | 6047 |
| 3 | TGLHPTQAPTHLSVDTKFKTEGLCVDIPGIPKDMTYRRLISMMGFKMNYQVNGYPNMFITREEAIRHVRAWIGFDVEGCHATREAVGTNLPLQLGFSTGVNLVAVPTGYV | 6050 |

DTPNNTDFSRVSAKPPPGDQFKHLIPLMYKGLPWNVVRIKIVQMLS DTLKNLS DRVV FVLWAHGFELTSMKYFVKIGPERTCCLCDRRATCFSTASDTYACWHHSIGFDY

|   |                                                                                                                   |      |
|---|-------------------------------------------------------------------------------------------------------------------|------|
| 1 | DTPNNTDFSRVSAKPPPGDQFKHLIPLMYKGLPWNVVRIKIVQMLS DTLKNLS DRVV FVLWAHGFELTSMKYFVKIGPERTCCLCDRRATCFSTASDTYACWHHSIGFDY | 6160 |
| 2 | DTPNNTDFSRVSAKPPPGDQFKHLIPLMYKGLPWNVVRIKIVQMLS DTLKNLS DRVV FVLWAHGFELTSMKYFVKIGPERTCCLCDRRATCFSTASDTYACWHHSIGFDY | 6157 |
| 3 | DTPNNTDFSRVSAKPPPGDQFKHLIPLMYKGLPWNVVRIKIVQMLS DTLKNLS DRVV FVLWAHGFELTSMKYFVKIGPERTCCLCDRRATCFSTASDTYACWHHSIGFDY | 6160 |

VYNPFMIDVQQWGFTGNLQSNHDLYCQVHGNAHVASCDAIMTRCLAVHECFVKRVDWTIEYPIIGDELKINAACRKVQHMVVKAALLADKFPVLHDIGNPKAIKCVPQAD

1 VYNPFMIDVQQWGFTGNLQSNHDLYCQVHGNAHVASCDAIMTRCLAVHECFVKRVDWTIEYPIIGDELKINAACRKVQHMVVKAALLADKFPVLHDIGNPKAIKCVPQAD 6270  
2 VYNPFMIDVQQWGFTGNLQSNHDLYCQVHGNAHVASCDAIMTRCLAVHECFVKRVDWTIEYPIIGDELKINAACRKVQHMVVKAALLADKFPVLHDIGNPKAIKCVPQAD 6267  
3 VYNPFMIDVQQWGFTGNLQSNHDLYCQVHGNAHVASCDAIMTRCLAVHECFVKRVDWTIEYPIIGDELKINAACRKVQHMVVKAALLADKFPVLHDIGNPKAIKCVPQAD 6270

VEWKFYDAQPCSDKAYKIEELFYSYATHSDKFTDGVCLFWNCNVD RYPANSIVCRFDTRVLSNLNLP GCDGGS LYVNKHAFHTPAFDKSAFVNLKQLPFFYYSDSPCESH

1 VEWKFYDAQPCSDKAYKIEELFYSYATHSDKFTDGVCLFWNCNVD RYPANSIVCRFDTRVLSNLNLP GCDGGS LYVNKHAFHTPAFDKSAFVNLKQLPFFYYSDSPCESH 6380  
2 VEWKFYDAQPCSDKAYKIEELFYSYATHSDKFTDGVCLFWNCNVD RYPANSIVCRFDTRVLSNLNLP GCDGGS LYVNKHAFHTPAFDKSAFVNLKQLPFFYYSDSPCESH 6377  
3 VEWKFYDAQPCSDKAYKIEELFYSYATHSDKFTDGVCLFWNCNVD RYPANSIVCRFDTRVLSNLNLP GCDGGS LYVNKHAFHTPAFDKSAFVNLKQLPFFYYSDSPCESH 6380

GKQVVSDIDYVPLKSATCITRCNLGGAVCRHHANEYRLYLDAYNMMISAGFSLWVYKQFDTYNLWNTFTRLQSL ENVAFNVVNKGHFDGQQGEVPVSIINNTVYTKVDGV

1 GKQVVSDIDYVPLKSATCITRCNLGGAVCRHHANEYRLYLDAYNMMISAGFSLWVYKQFDTYNLWNTFTRLQSL ENVAFNVVNKGHFDGQQGEVPVSIINNTVYTKVDGV 6490  
2 GKQVVSDIDYVPLKSATCITRCNLGGAVCRHHANEYRLYLDAYNMMISAGFSLWVYKQFDTYNLWNTFTRLQSL ENVAFNVVNKGHFDGQQGEVPVSIINNTVYTKVDGV 6487  
3 GKQVVSDIDYVPLKSATCITRCNLGGAVCRHHANEYRLYLDAYNMMISAGFSLWVYKQFDTYNLWNTFTRLQSL ENVAFNVVNKGHFDGQQGEVPVSIINNTVYTKVDGV 6490

DVELFENKTTLPVNVAFELWAKRNIKPVEVKILNNLGVDIAANTVIWDYKRDAPAHISTIGVCSMTDIAKKPTETICAPLTVFFDGRVDGQVDLFRNARNGVLITEGSV

1 DVELFENKTTLPVNVAFELWAKRNIKPVEVKILNNLGVDIAANTVIWDYKRDAPAHISTIGVCSMTDIAKKPTETICAPLTVFFDGRVDGQVDLFRNARNGVLITEGSV 6600  
2 DVELFENKTTLPVNVAFELWAKRNIKPVEVKILNNLGVDIAANTVIWDYKRDAPAHISTIGVCSMTDIAKKPTETICAPLTVFFDGRVDGQVDLFRNARNGVLITEGSV 6597  
3 DVELFENKTTLPVNVAFELWAKRNIKPVEVKILNNLGVDIAANTVIWDYKRDAPAHISTIGVCSMTDIAKKPTETICAPLTVFFDGRVDGQVDLFRNARNGVLITEGSV 6600



KGLQPSVGPKQASLNGVTLIGEAVKTQFNYYKKVDGVVQQLPETYFTQSRNLQEFKPRSQMEIDFLELAMDEFIERYKLEGYAFEHIVYGDFSHSQLGGHLHLLIGLAKRF

1 KGLQPSVGPKQASLNGVTLXXXXXXXXXXXXXXXXXXXXVQQLPETYFTQSRNXXXXXXXXSQXXXXXELAMDEFIERYKLEGYAFEHIVYGDFSHSQLGGHLHLLIGLAKRF 6710

2 KGLQPSVGPKQASLNGVTLIGEAVKTQFNYYKKVDGVVQQLPETYFTQSRNLQEFKPRSQMEIDFLELAMDEFIERYKLEGYAFEHIVYGDFSHSQLGGHLHLLIGLAKRF 6707

3 KGLQPSVGPKQASLNGVTLIGEAVKTQFNYYKKVDGVVQQLPETYFTQSRNLQEFKPRSQMEIDFLELAMDEFIERYKLEGYAFEHIVYGDFSHSQLGGHLHLLIGLAKRF 6710

KESPFELEDFIPMDSTVKNYFITDAQTGSSKVCVCSVIDLLDDFVEIISQDLSVVSKVVKVTIDYTEISFMLWCKDGHVETFYPKLQSSQAWQPGVAMPNLYKMQRMLL

1 RESPFELEDFIPMDSTVKNYFITDAQTGSSKVCVCSVIDLLDDFVEIISQDLSVVSKVVKVTIDYTEISFMLWCKDGHVETFYPKLQSSQAWQPGVAMPNLYKMQRMLL 6820

2 KESPFELEDFIPMDSTVKNYFITDAQTGSSKVCVCSVIDLLDDFVEIISQDLSVVSKVVKVTIDYTEISFMLWCKDGHVETFYPKLQSSQAWQPGVAMPNLYKMQRMLL 6817

3 KESPFELEDFIPMDSTVKNYFITDAQTGSSKVCVCSVIDLLDDFVEIISQDLSVVSKVVKVTIDYTEISFMLWCKDGHVETFYPKLQSSQAWQPGVAMPNLYKMQRMLL 6820

EKCDLQNYGDSATLPKGIMMNVAKYTQLCQYLNTLT LAVPYNMRVIHFGAGSDKGVAPGTAVLRQWLPTGTLLVDSLND FVSDADSTLIGDCATVHTANKWDLIISDMY

1 EKCDLQNYGDSATLPKGIMMNVAKYTQLCQYLNTLT LAVPYNMRVIHFGAGSDKGVAPGTAVLRQWLPTGTLLVDSLND FVSDADSTLIGDCATVHTANKWDLIISDMY 6930

2 EKCDLQNYGDSATLPKGIMMNVAKYTQLCQYLNTLT LAVPYNMRVIHFGAGSDKGVAPGTAVLRQWLPTGTLLVDSLND FVSDADSTLIGDCATVHTANKWDLIISDMY 6927

3 EKCDLQNYGDSATLPKGIMMNVAKYTQLCQYLNTLT LAVPYNMRVIHFGAGSDKGVAPGTAVLRQWLPTGTLLVDSLND FVSDADSTLIGDCATVHTANKWDLIISDMY 6930

DPKTKNVTKENDSKEGFFTYICGFIQQKLALGGSVAIKITEHSWNADLYKLMGHFAWWTAFVTNVNASSSEAF LIGCN YLGKPREQIDGYVMHANYIFWRNTNPIQLSSY

1 DPKTKNVTKENDSKEGFFTYICGFIQQKLALGGSVAIKITEHSWNADLYKLMGHFAWWTAFVTNVNASSSEAF LIGCN YLGKPREQIDGYVMHANYIFWRNTNPIQLSSY 7040

2 DPKTKNVTKENDSKEGFFTYICGFIQQKLALGGSVAIKITEHSWNADLYKLMGHFAWWTAFVTNVNASSSEAF LIGCN YLGKPREQIDGYVMHANYIFWRNTNPIQLSSY 7037

3 DPKTKNVTKENDSKEGFFTYICGFIQQKLALGGSVAIKITEHSWNADLYKLMGHFAWWTAFVTNVNASSSEAF LIGCN YLGKPREQIDGYVMHANYIFWRNTNPIQLSSY 7040

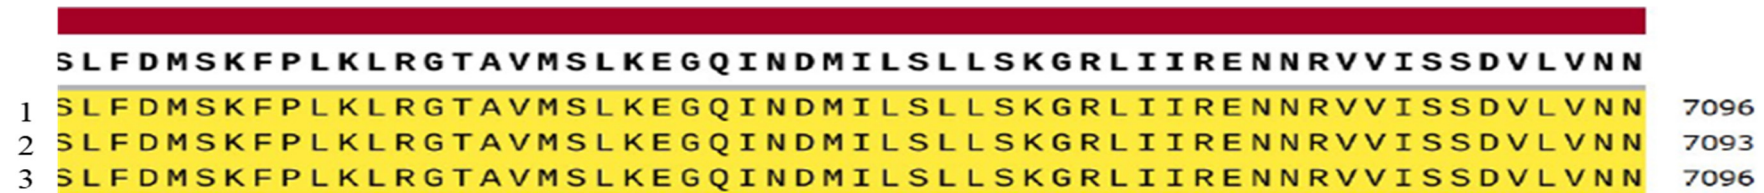

**Figure S6.** Schematic view of contigs of the ORF1ab polyprotein of 1. Alpha Variant (B.1.1.7) (UDQ41836.1) and 2. Delta Variant (B.1.617.21) (UDU36744.1) of SARs-CoV-2 with 3. reference Strain (Wuhan) (YP\_009724389.1).

## 7. ORF3a protein

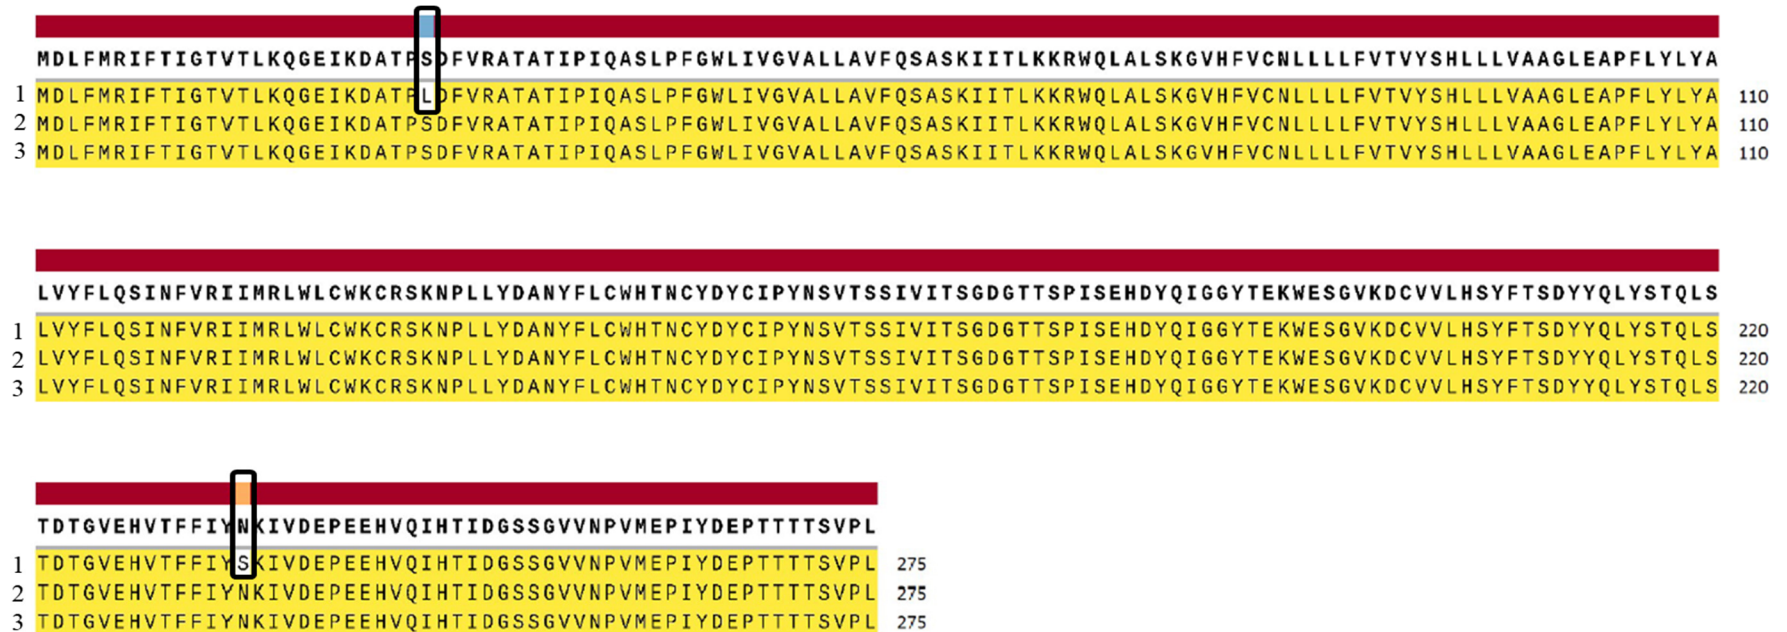

**Figure S7.** Schematic view of contigs of the ORF3a protein of 1. Alpha Variant (B.1.1.7) (UDQ41839.1) and 2. Delta Variant (B.1.617.21) (UDU36747.1) of SARs-CoV-2 with 3. reference Strain (Wuhan) (YP\_009724391.1).

## 8. ORF6 protein

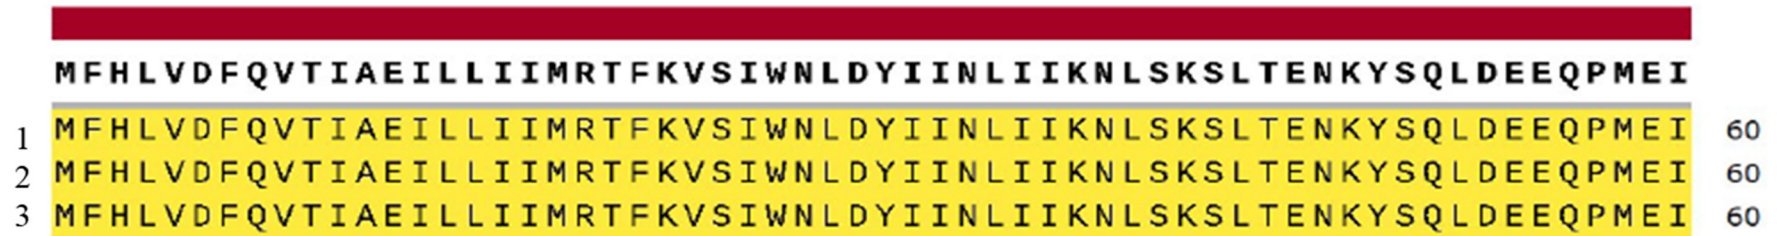

**Figure S8.** Schematic view of contigs of the ORF6 protein of 1. Alpha Variant (B.1.1.7) (UDQ41842.1) and 2. Delta Variant (B.1.617.21) (UDU36750.1) of SARs-CoV-2 with 3. reference Strain (Wuhan) (YP\_009724394.1).

## 9. ORF7a protein

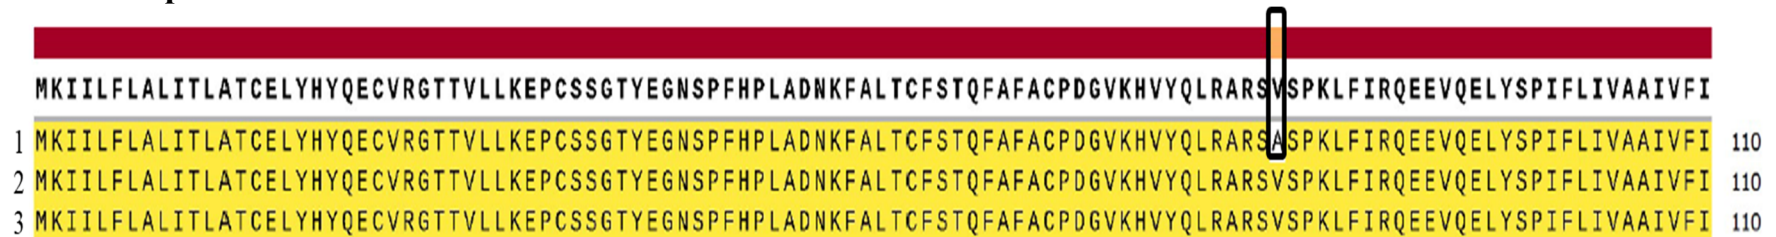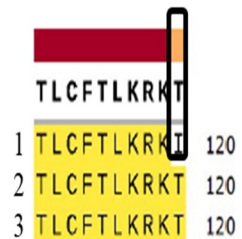

**Figure S9.** Schematic view of contigs of the ORF7a protein of 1. Alpha Variant (B.1.1.7) (UDQ41843.1) and 2. Delta Variant (B.1.617.21) (UDU36751.1) of SARs-CoV-2 with 3. reference Strain (Wuhan) (YP\_009724395.1).



## 10. ORF7b protein

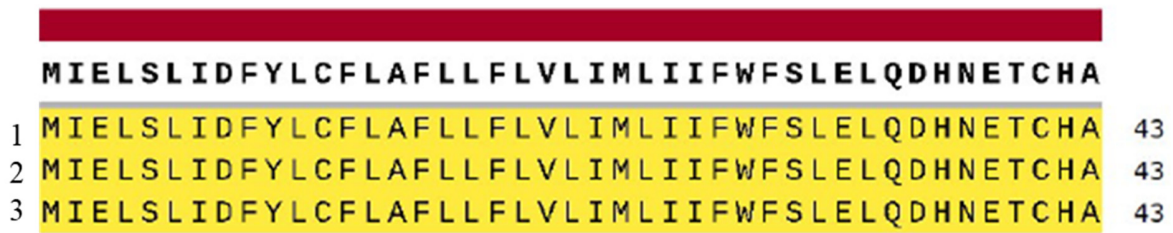

**Figure S10.** Schematic view of contigs of the ORF7b protein of 1. Alpha Variant (B.1.1.7) (UDQ41844.1) and 2. Delta Variant (B.1.617.21) (UDU36752.1) of SARs-CoV-2 with 3. reference Strain (Wuhan) (YP\_009725318.1).

## 11. ORF8 protein

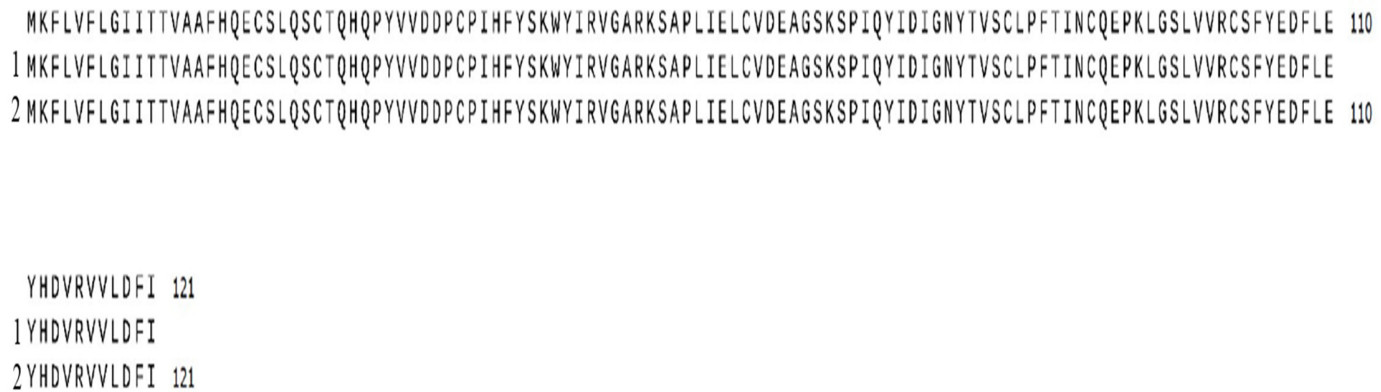

**Figure S11.** Schematic view of contigs of the ORF8 protein of 1. Delta Variant (B.1.617.21) (UDU36753.1) of SARs-CoV-2 with 2. reference Strain (Wuhan) (YP\_009724396.1).



Membrane Protein

Alpha (B.1.617.21)  
UDU36749.1

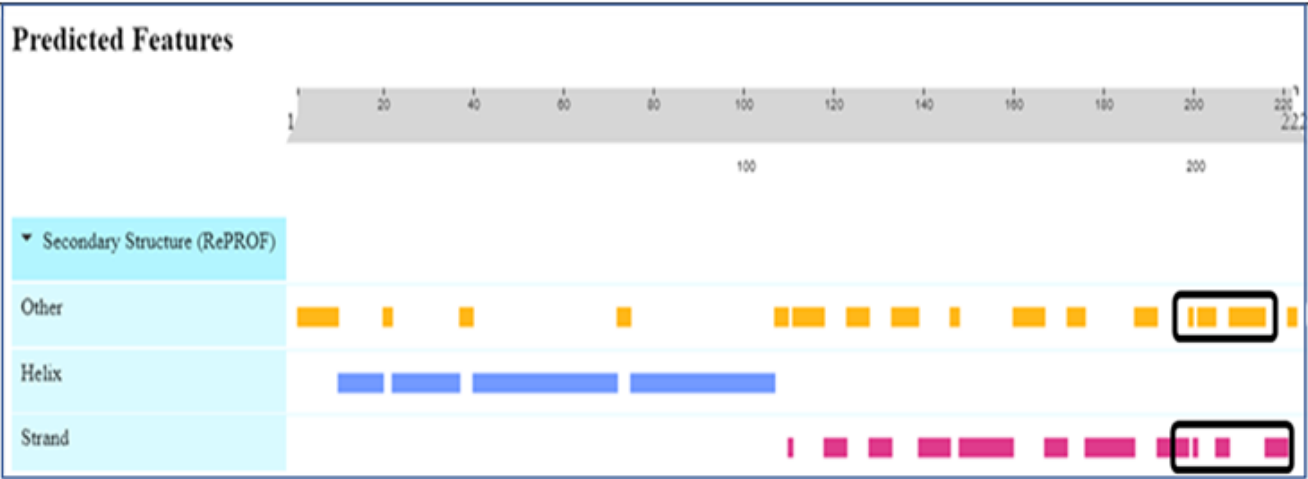

Wuhan  
YP\_009724393.1

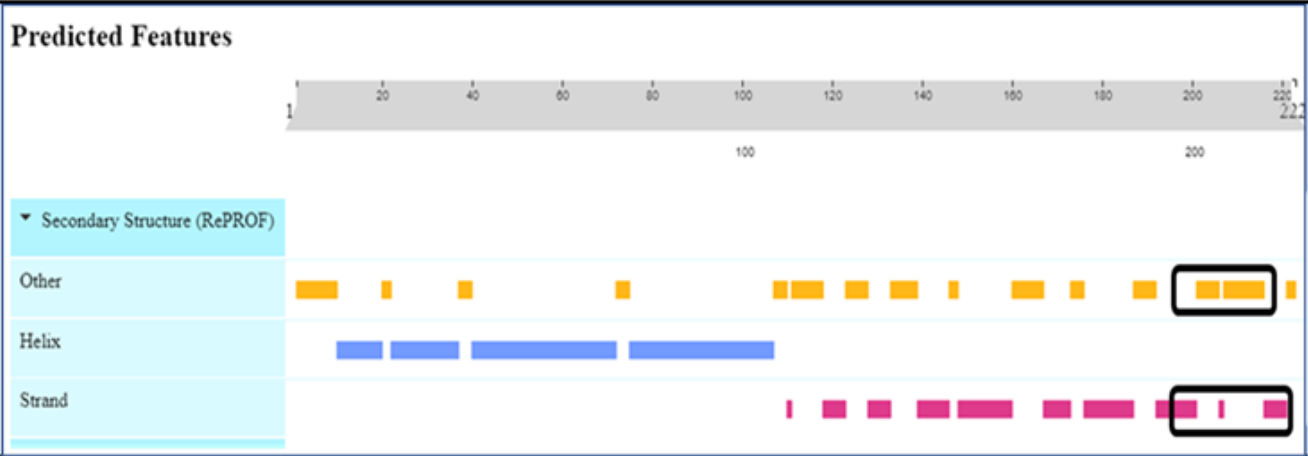

Alpha (B.1.617.21)  
UDU36749.1

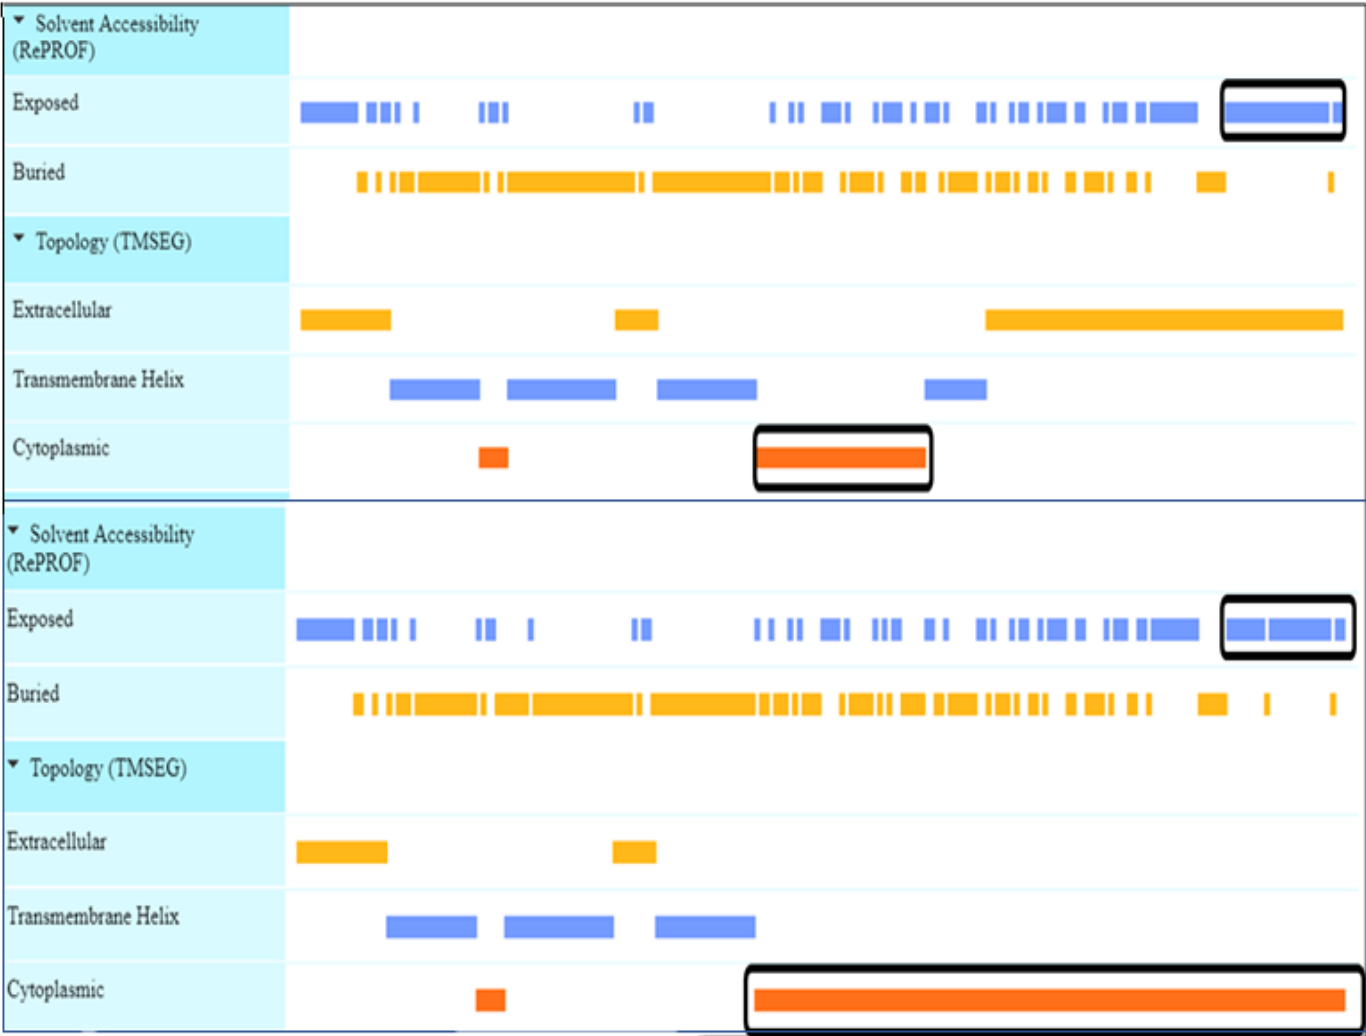

Wuhan  
YP\_009724393.1

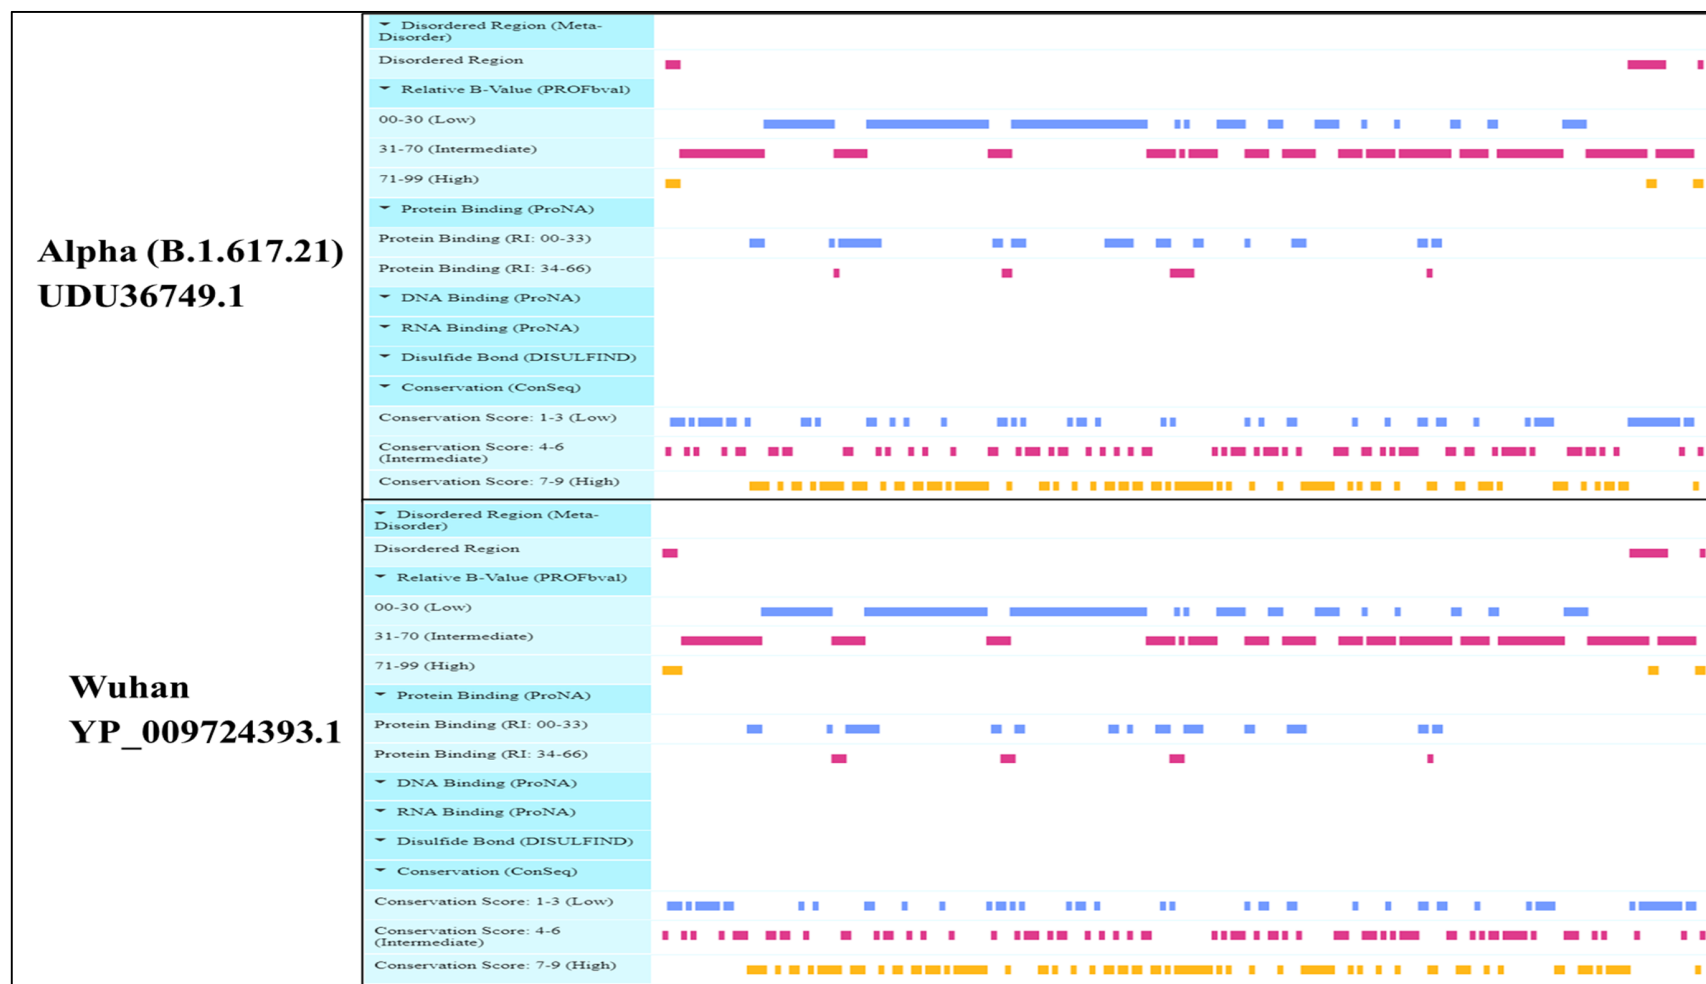

**Figure S12.** Viewer lays out predicted features of protein structural and functional features of Membrane Glycoproteins.



Nucleocapsid phosphoprotein

Alpha (B.1.617.21)  
UDU36754.1

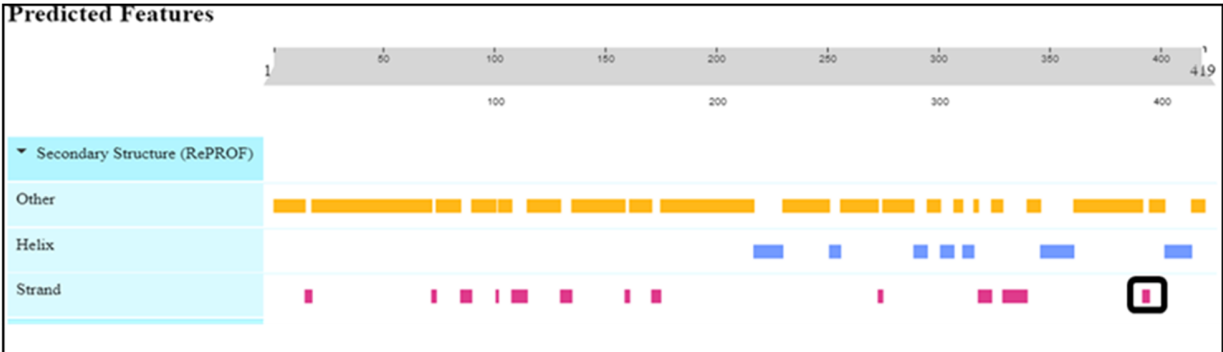

Delta (B.1.1.7)  
UDQ41846.1

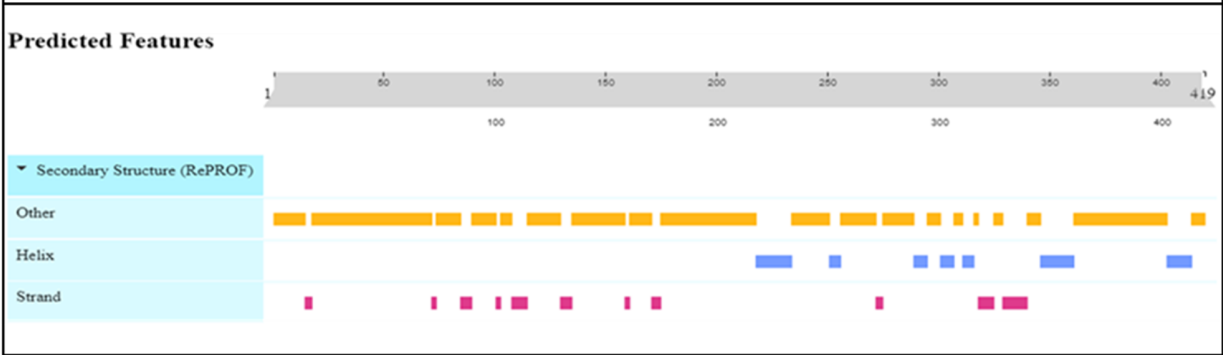

Wuhan  
YP\_009724397.2

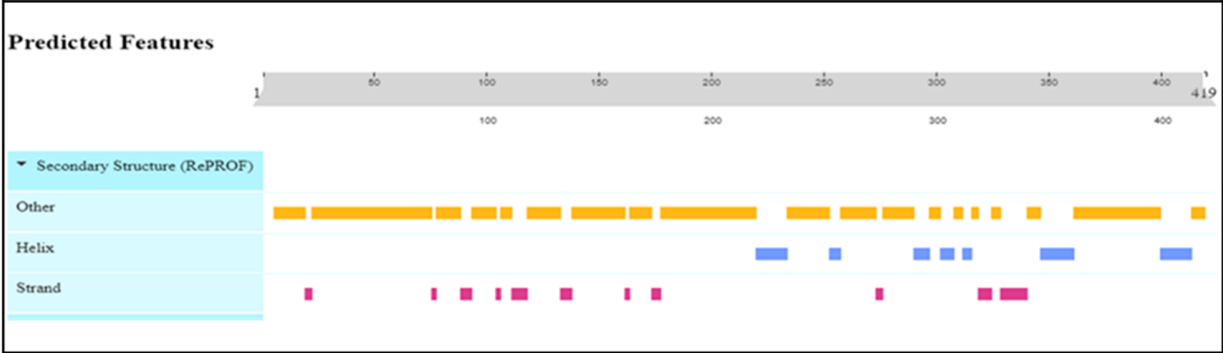

Alpha (B.1.617.21)  
UDU36754.1

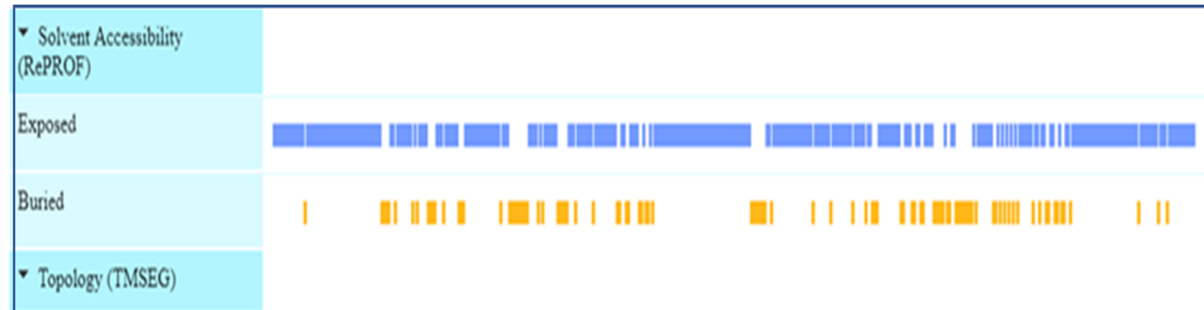

Delta (B.1.1.7)  
UDQ41846.1

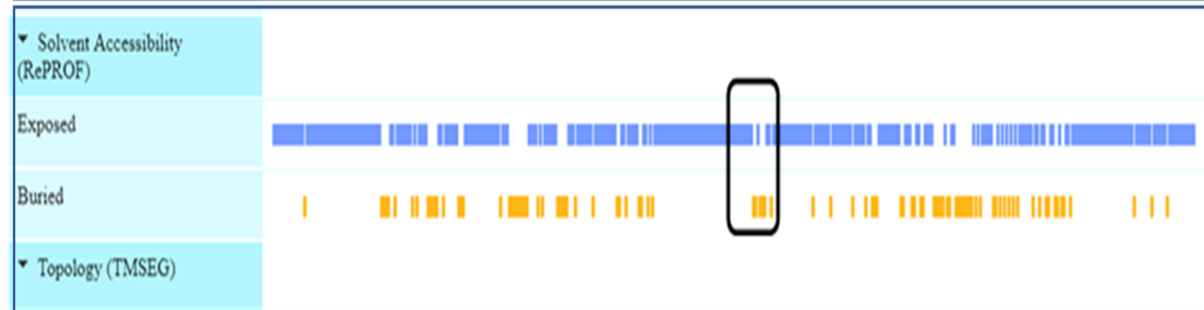

Wuhan  
YP\_009724397.2

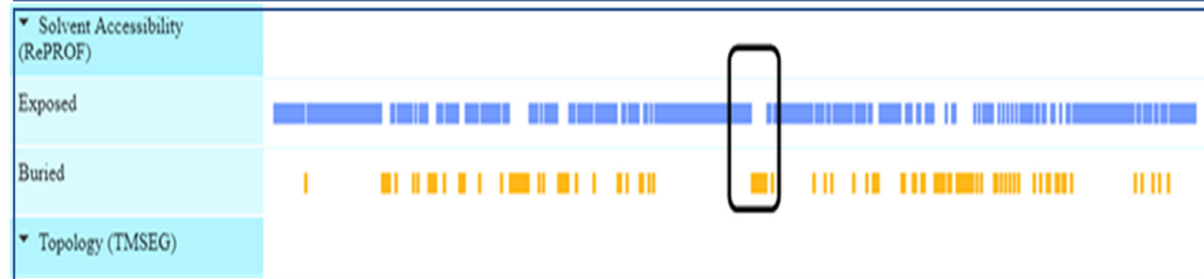



**Alpha (B.1.617.21)**  
**UDU36754.1**

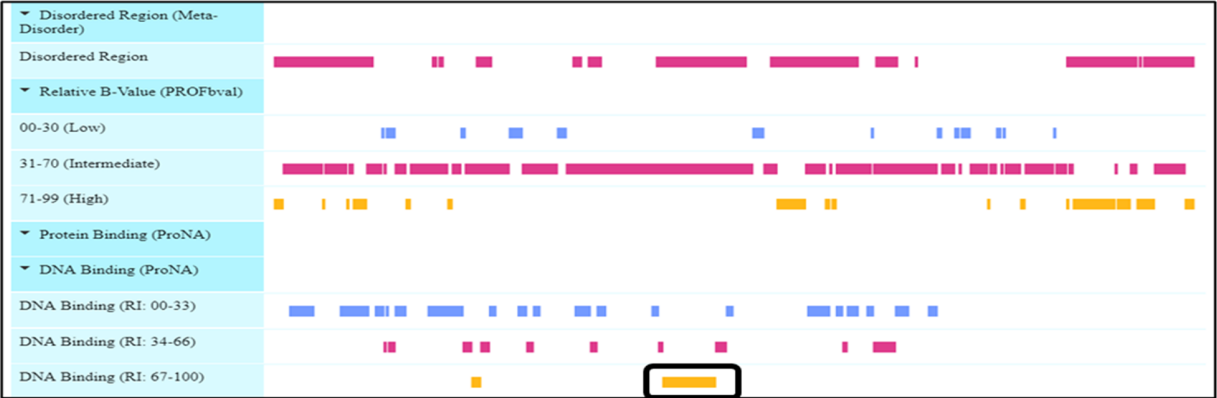

**Delta (B.1.1.7)**  
**UDQ41846.1**

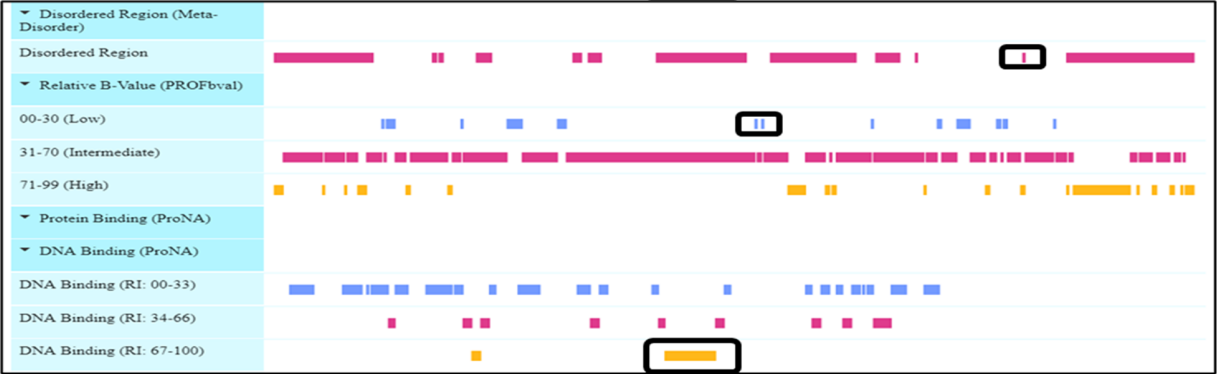

**Wuhan**  
**YP\_009724397.2**

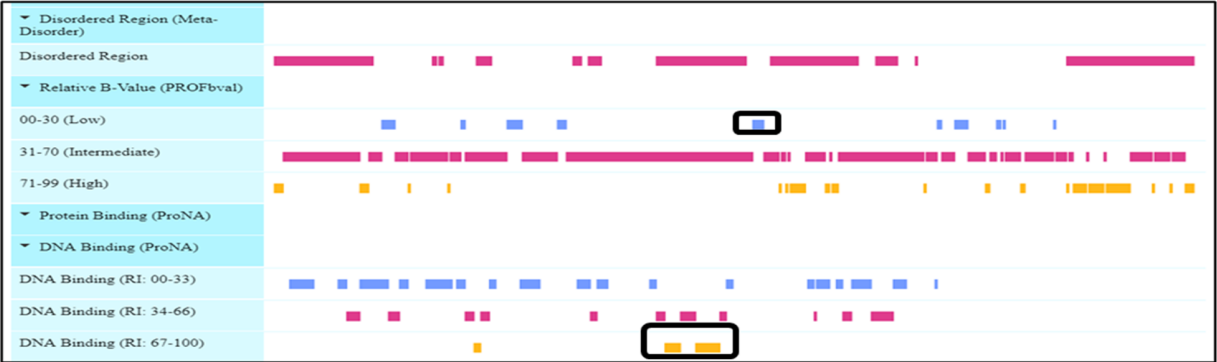

**Alpha (B.1.617.21)**  
**UDU36754.1**

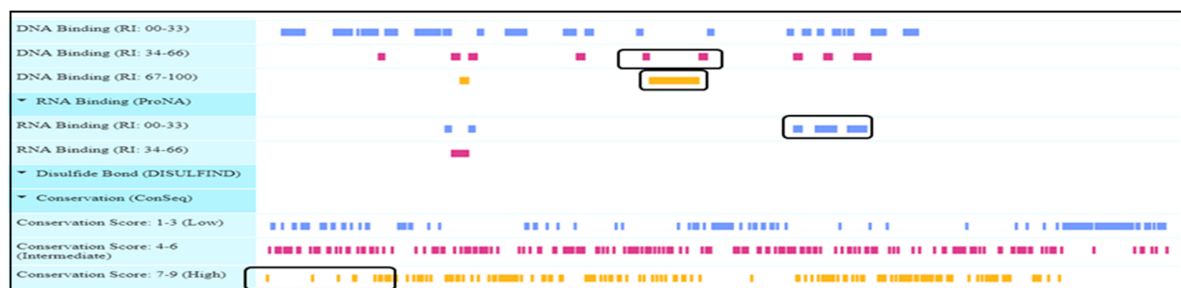

**Delta (B.1.1.7)**  
**UDQ41846.1**

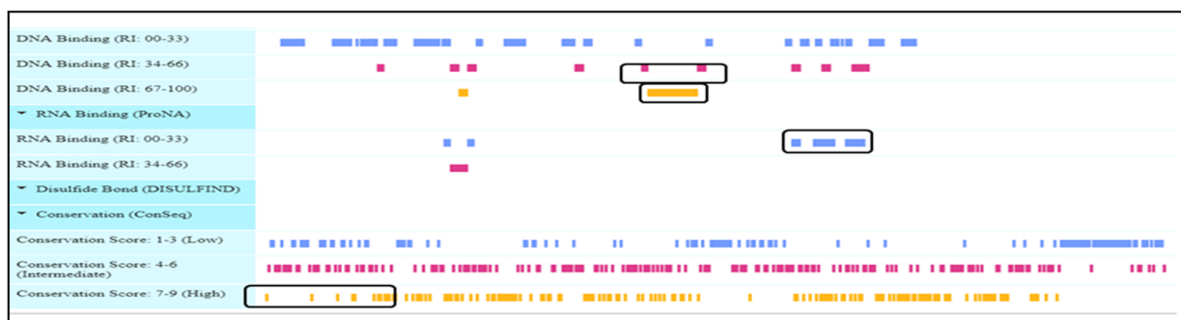

**Wuhan**  
**YP\_009724397.2**

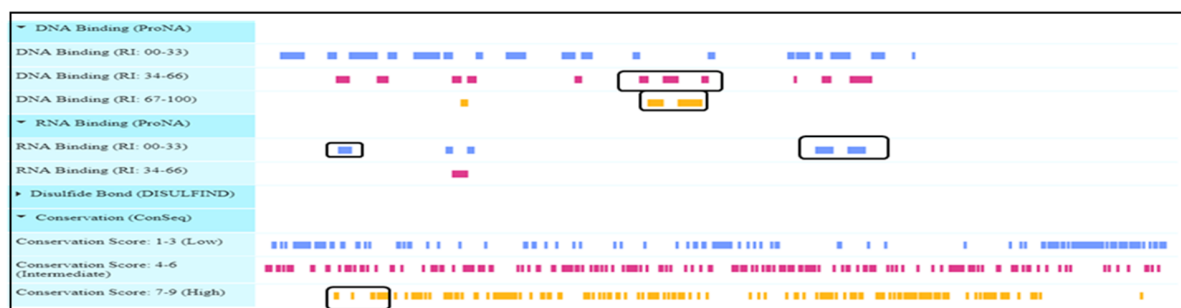

**Figure S13.** Viewer lays out predicted features of protein structural and functional features of Nucleocapsid phosphoprotein.

## 1. ORF1a Polypeptide

Alpha  
B.1.617.21  
UDU36745.1

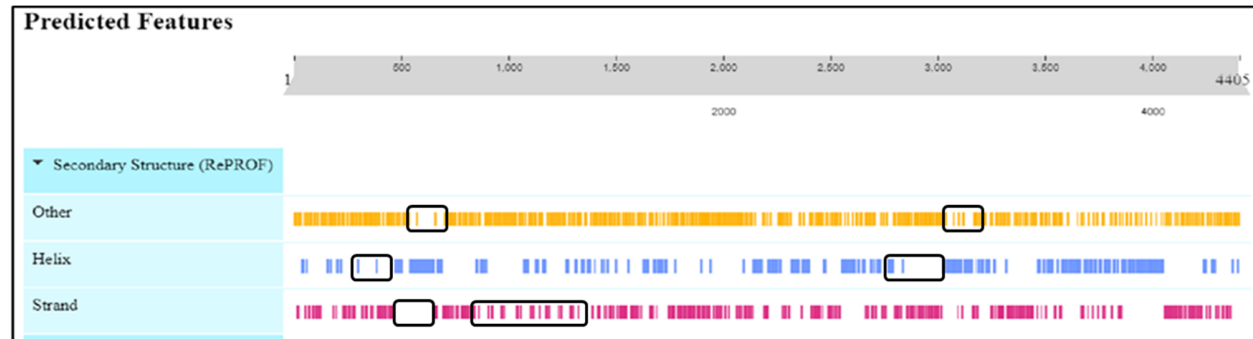

Delta  
B.1.1.7  
UDQ41837.1

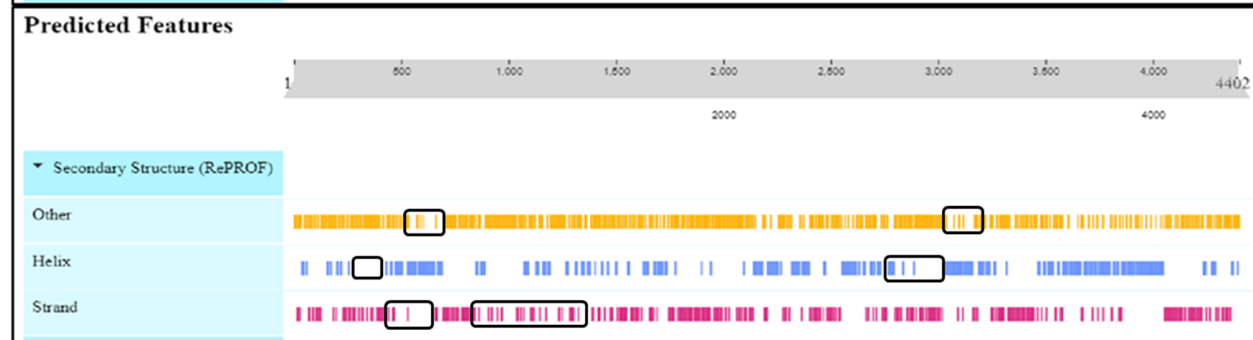

Wuhan  
YP\_009725295.1

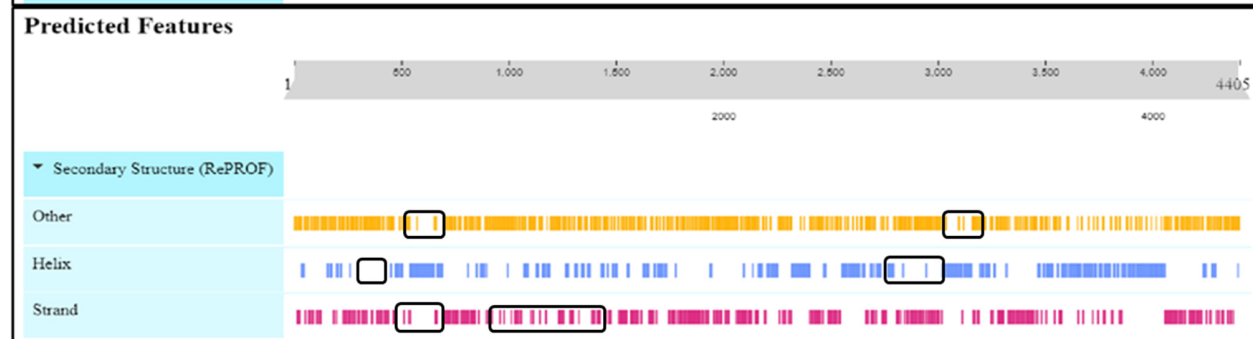



Alpha  
B.1.617.21  
UDU36745.1

Delta  
B.1.1.7  
UDQ41837.1

Wuhan  
YP\_009725295.1

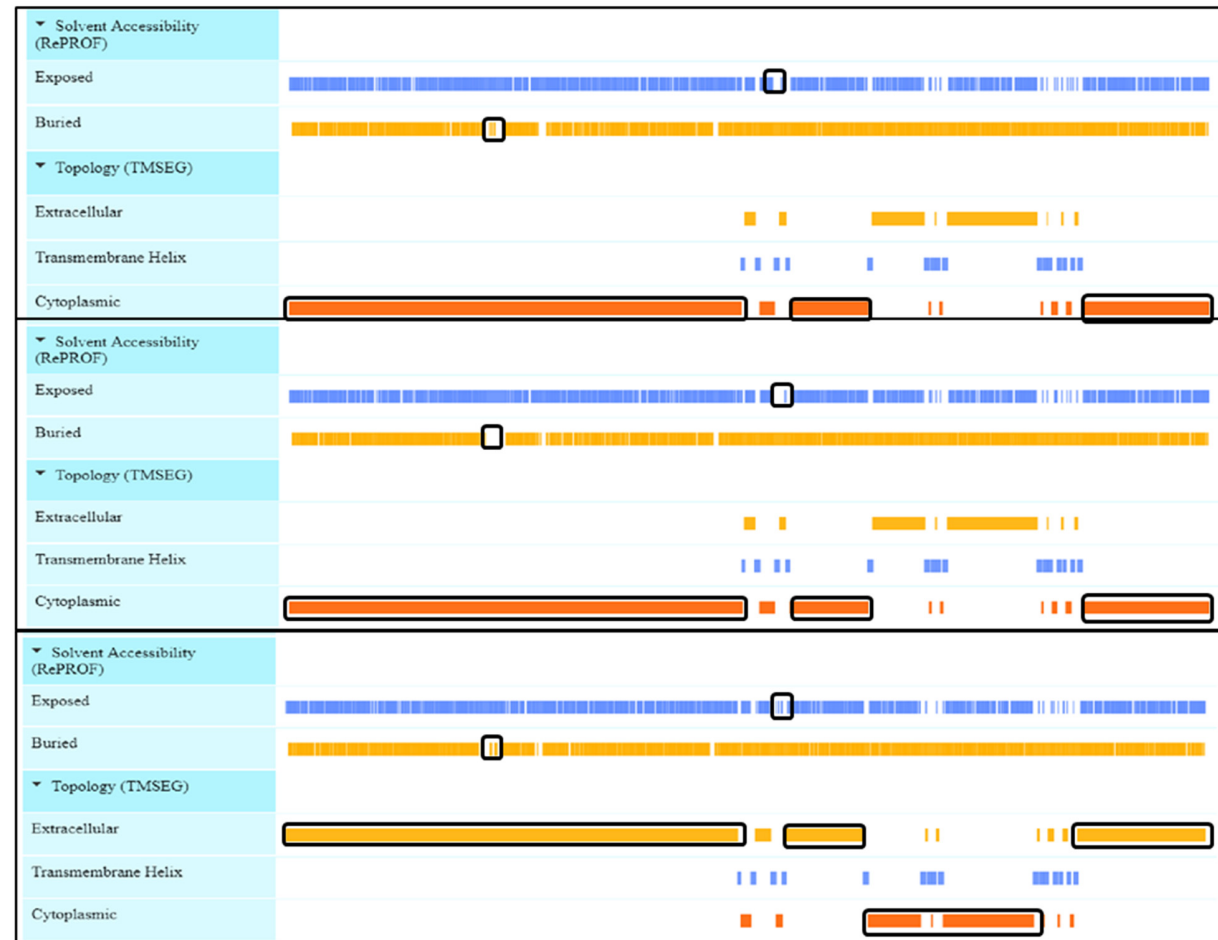

Alpha  
B.1.617.21  
UDU36745.1

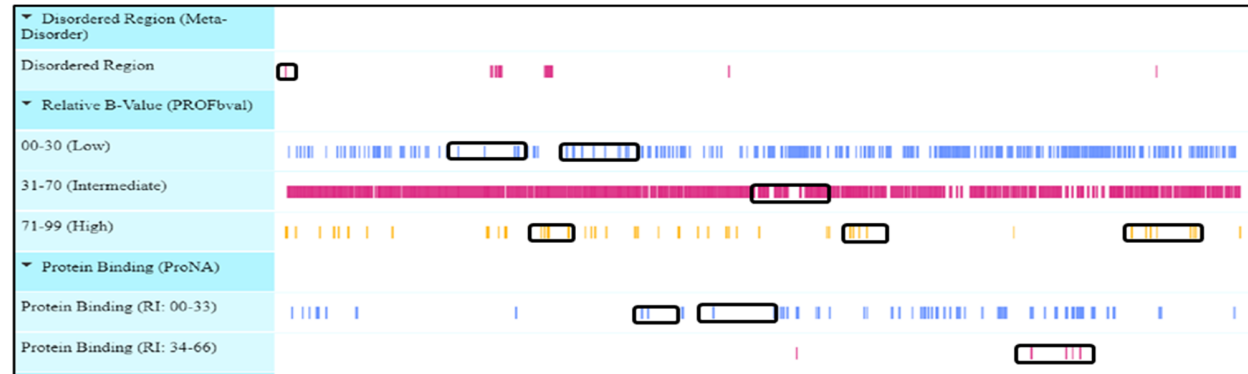

Delta  
B.1.1.7  
UDQ41837.1

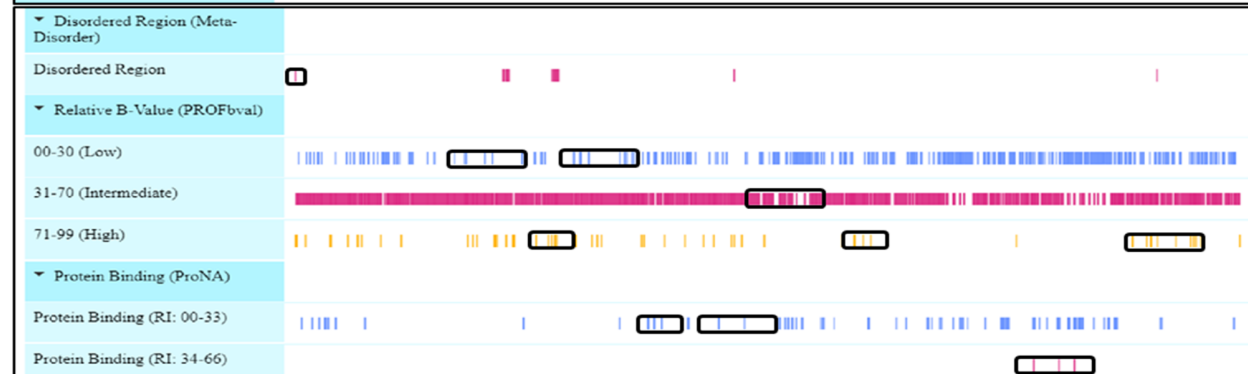

Wuhan  
YP\_009725295.1

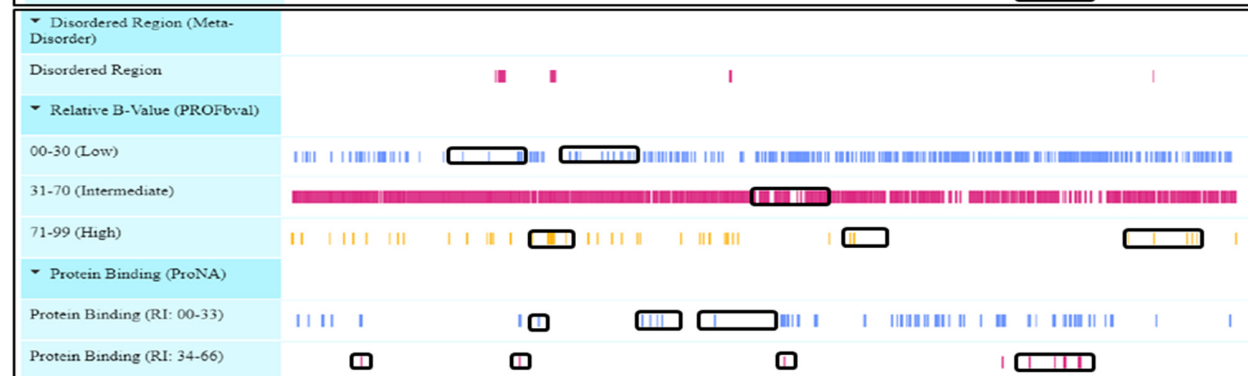

Alpha  
B.1.617.21  
UDU36745.1

Delta  
B.1.1.7  
UDQ41837.1

Wuhan  
YP\_009725295.1

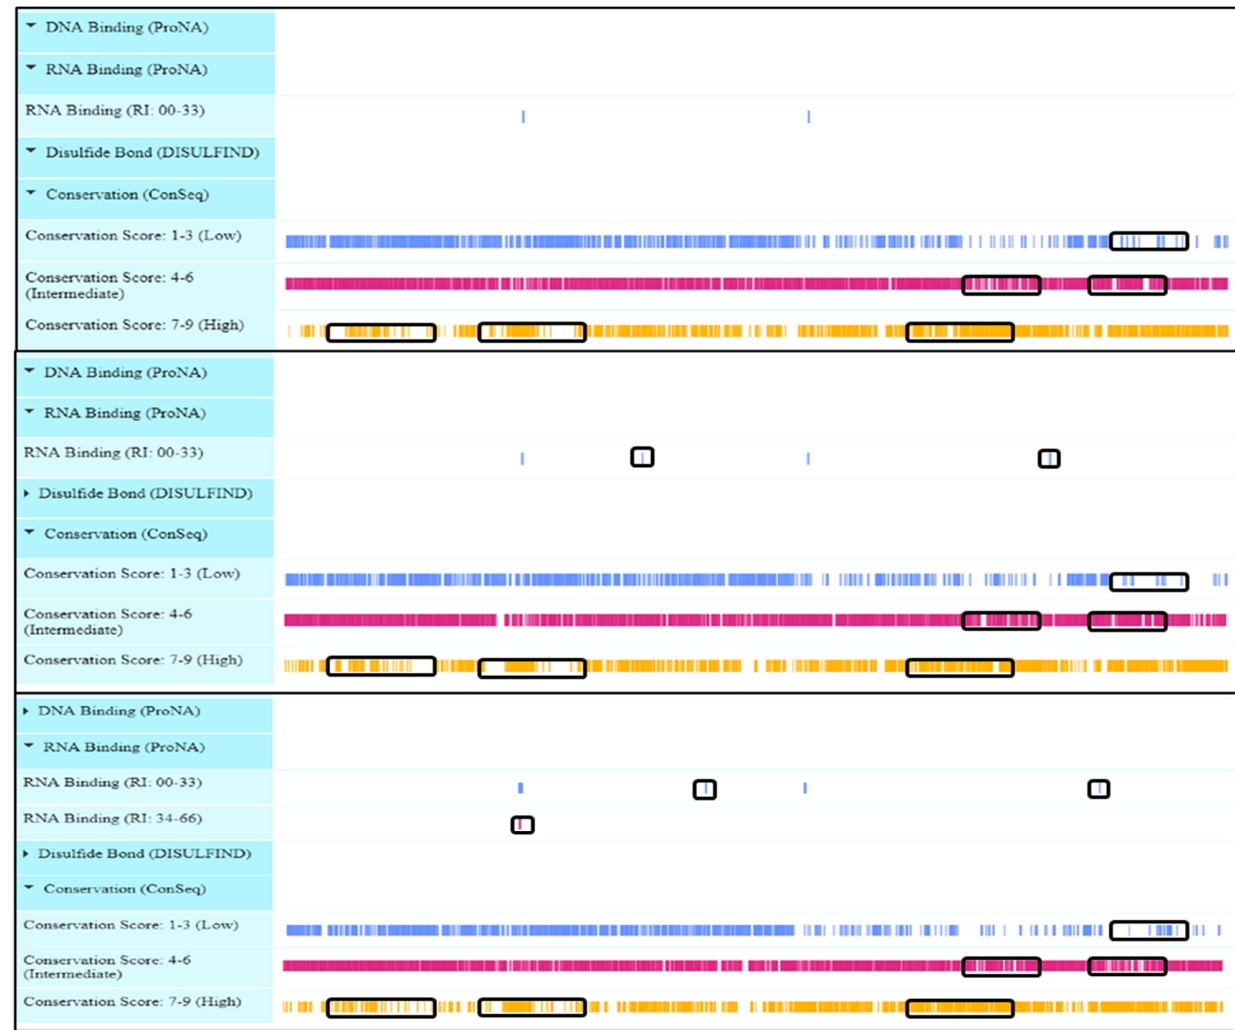

Figure S14. Viewer lays out predicted features of protein structural and functional features of ORF1a Polyprotein.



ORF1ab Polyprotein

Delta  
B.1.1.7  
UDQ41836.1

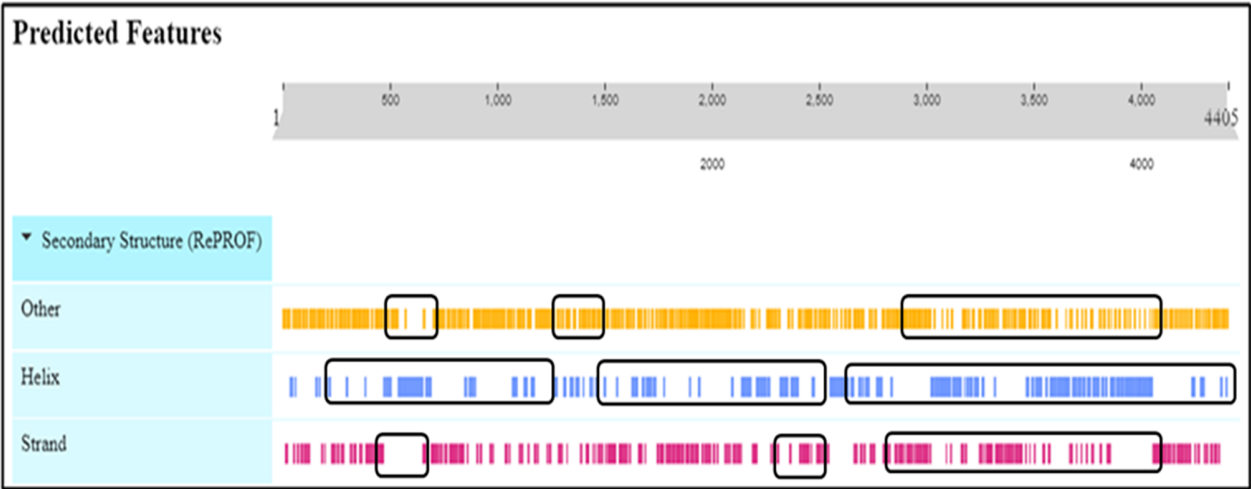

Wuhan  
YP\_009724389.1

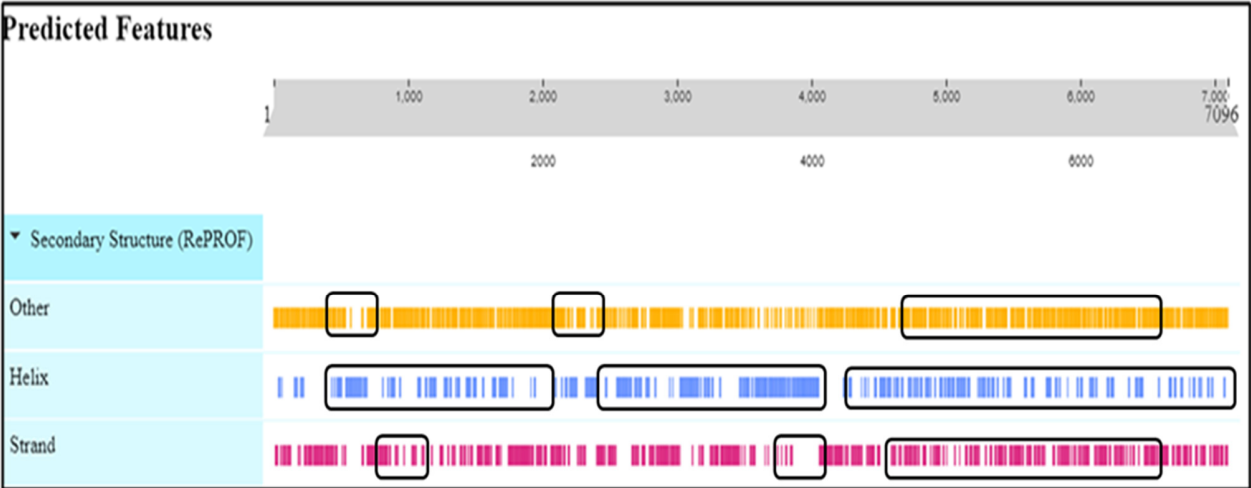

Delta  
B.1.1.7  
UDQ41836.1

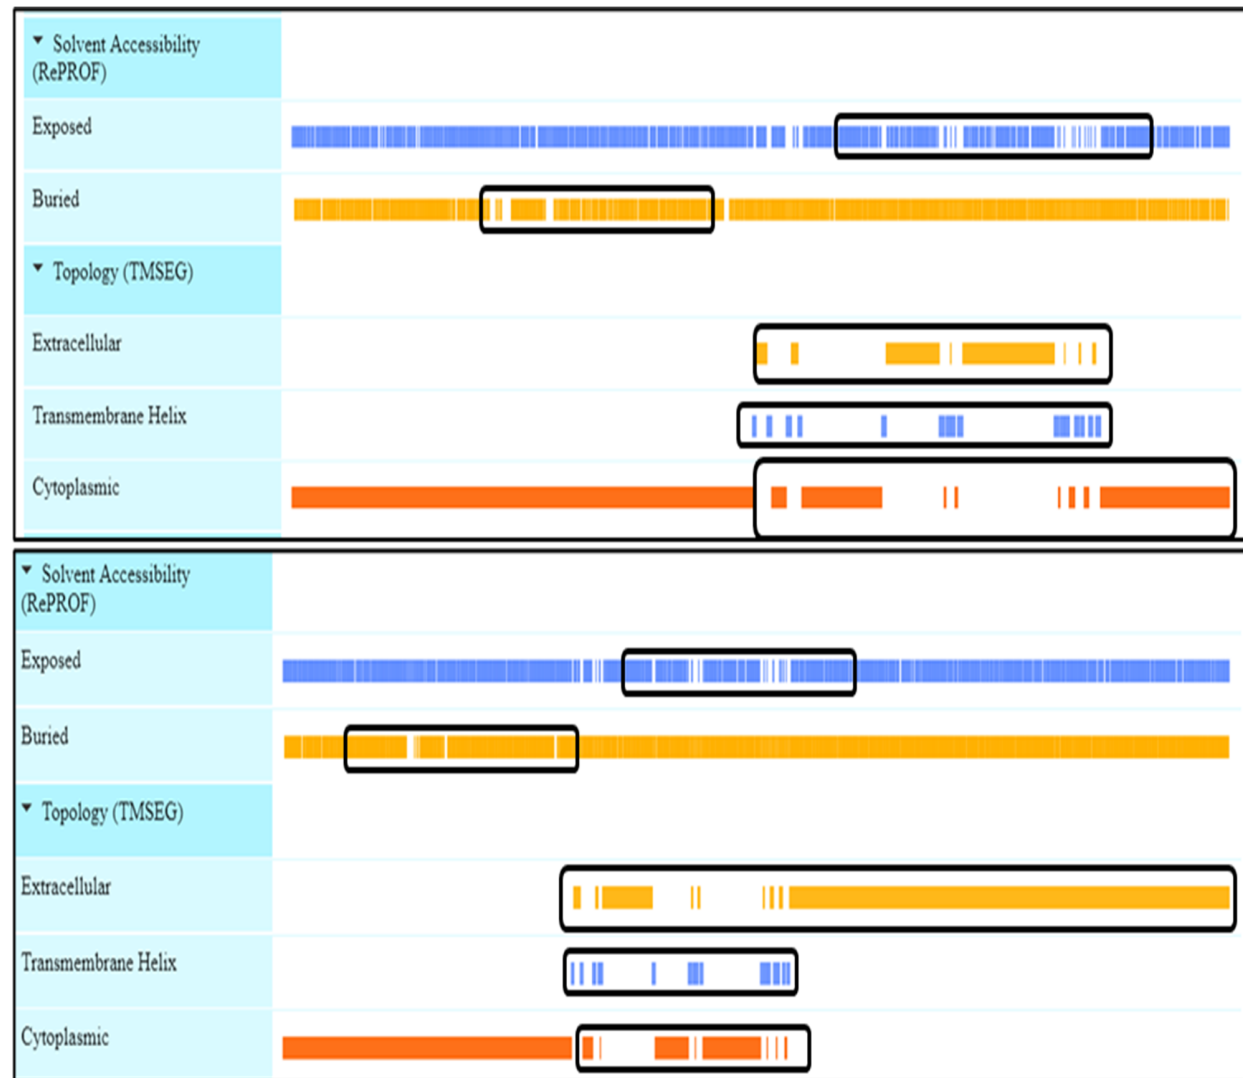

Wuhan  
YP\_009724389.1

Delta  
B.1.1.7  
UDQ41836.1

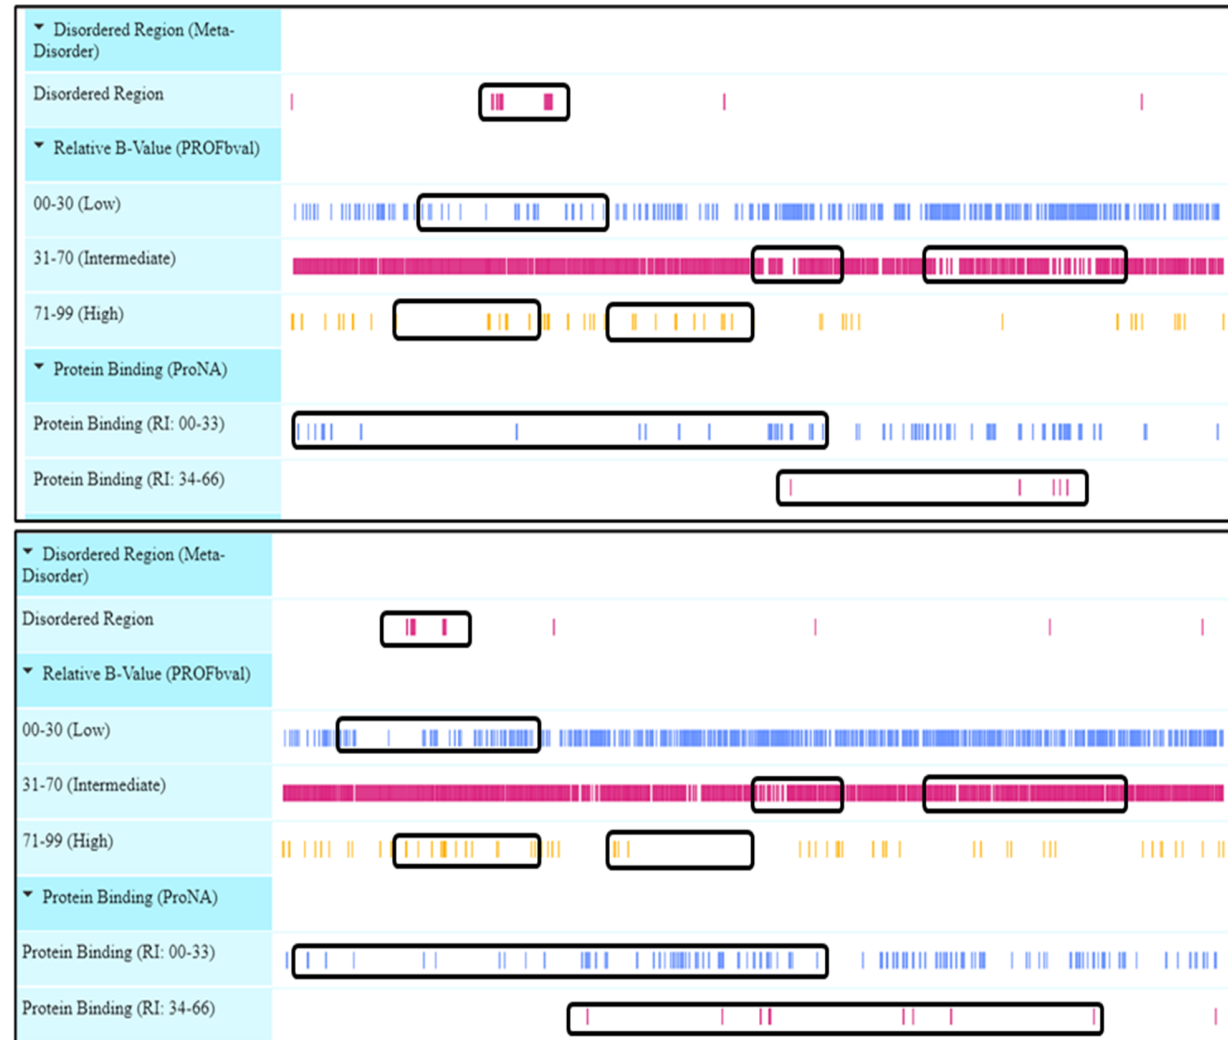

**Figure S15.** Viewer lays out predicted features of protein structural and functional features of ORF1ab Polyprotein.



## 2. ORF7a protein

Alpha

B.1.617.21

UDU36751.1

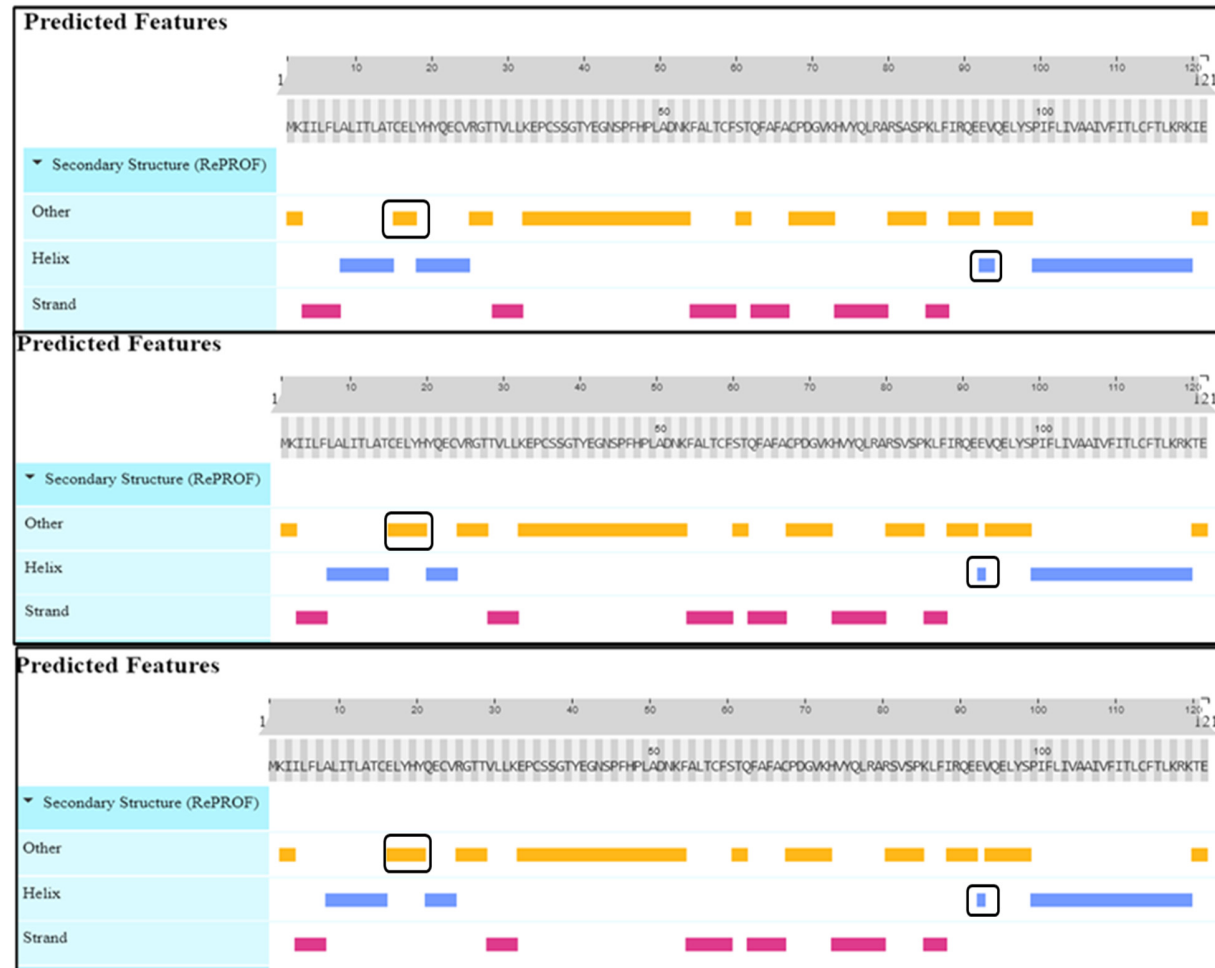

Delta

B.1.1.7

UDQ41843.1

Wuhan

YP\_009724395.1

**Alpha**  
**B.1.617.21**  
**UDU36751.1**

**Delta**  
**B.1.1.7**  
**UDQ41843.1**

**Wuhan**  
**YP\_009724395.1**

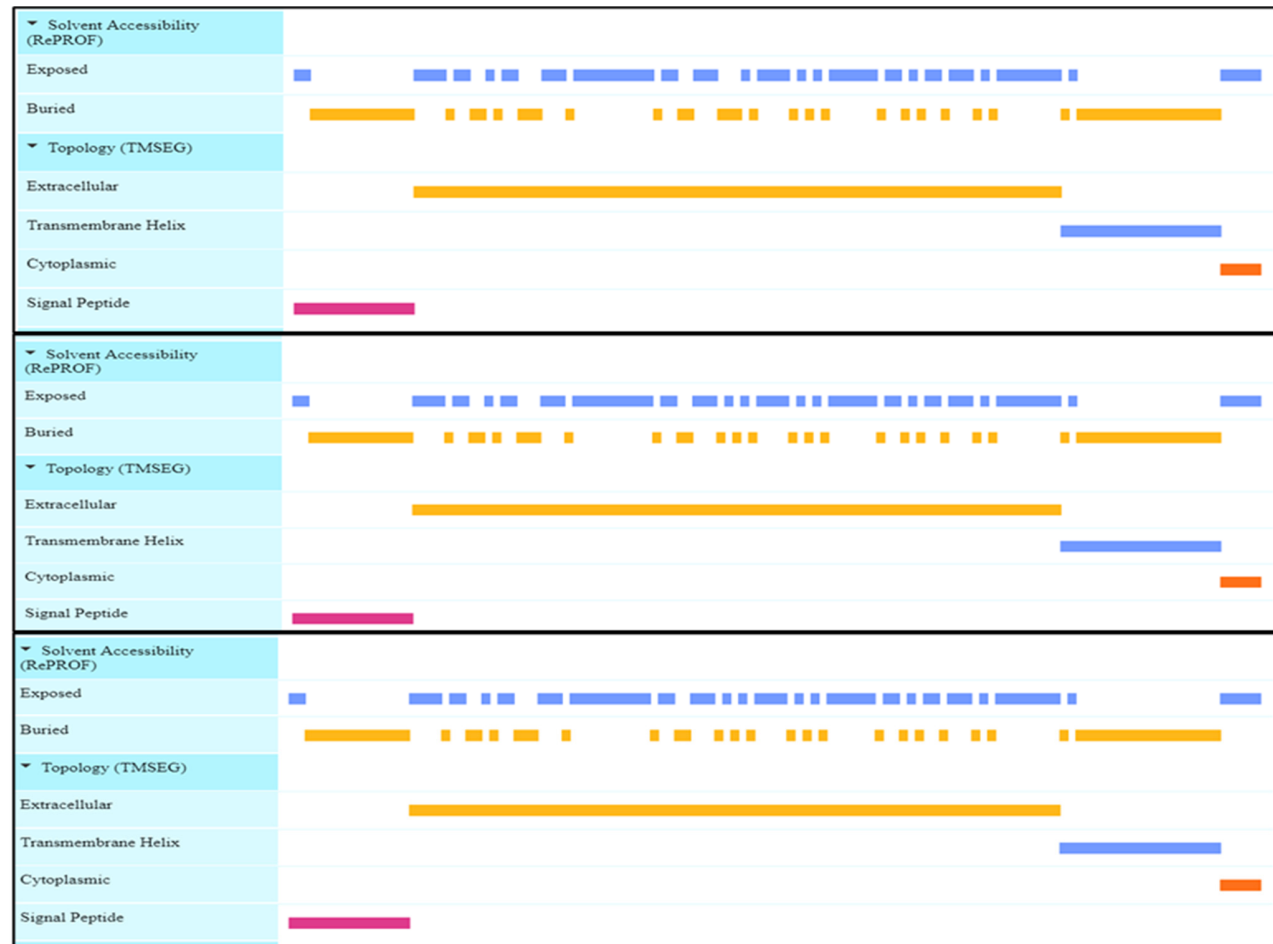

**Alpha**  
**B.1.617.21**  
**UDU36751.1**

**Delta**  
**B.1.1.7**  
**UDQ41843.1**

**Wuhan**  
**YP\_009724395.1**

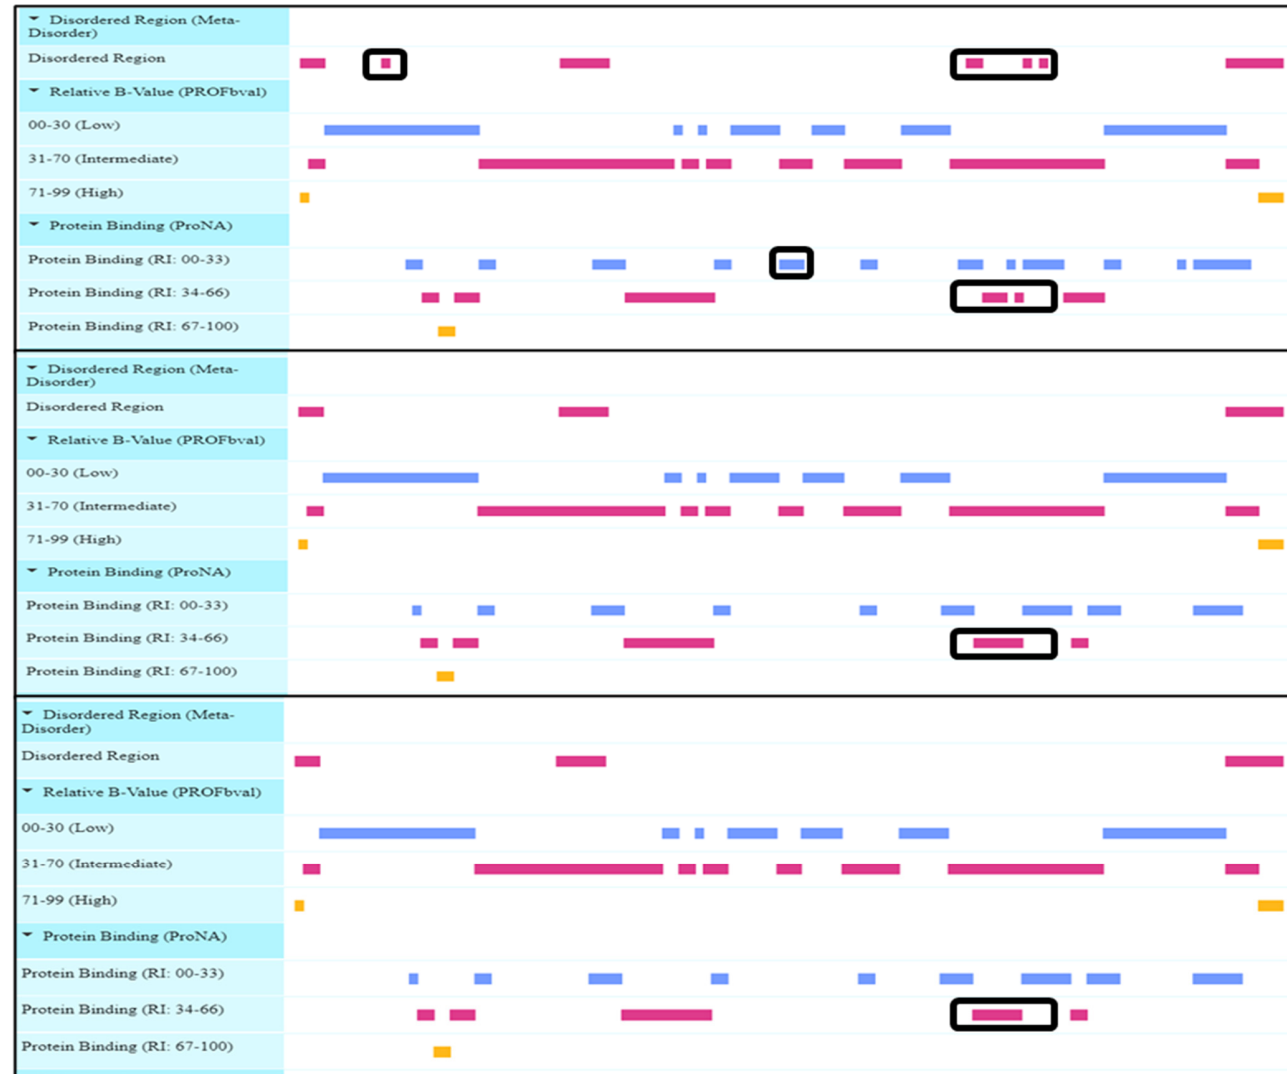



**Alpha**  
**B.1.617.21**  
**UDU36751.1**

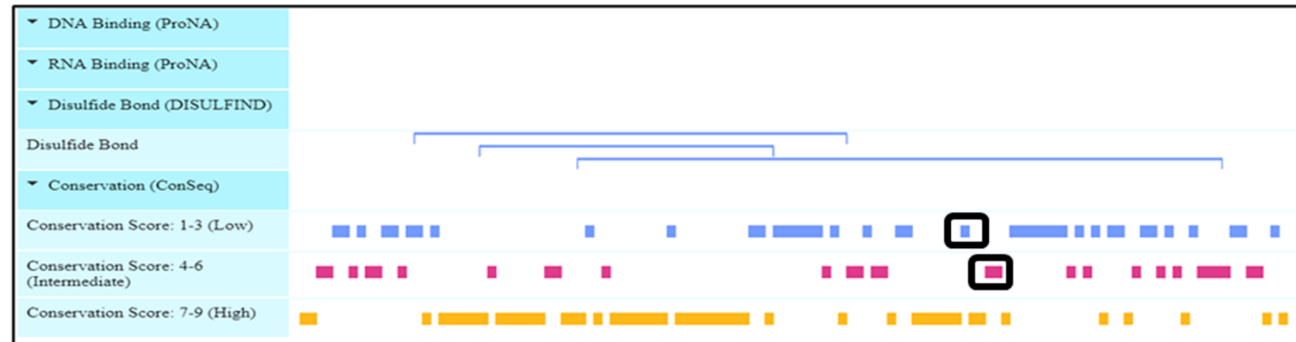

**Delta**  
**B.1.1.7**  
**UDQ41843.1**

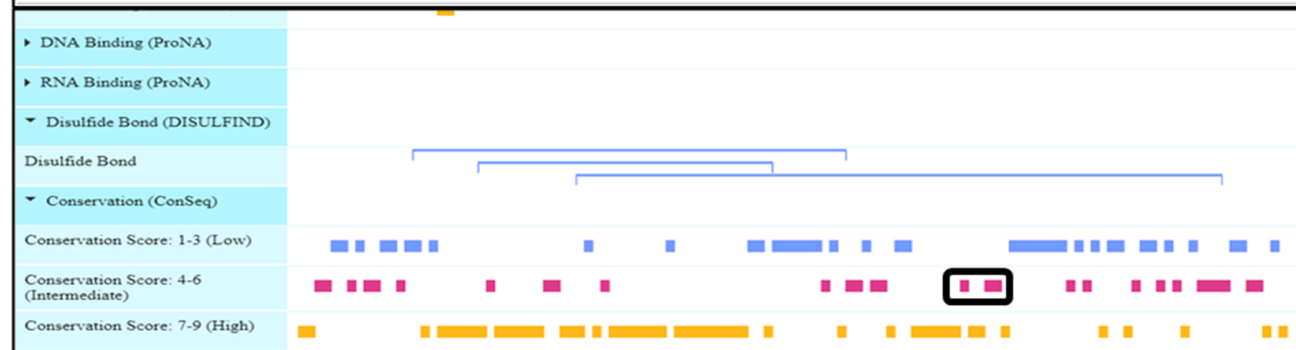

**Wuhan**  
**YP\_009724395.1**

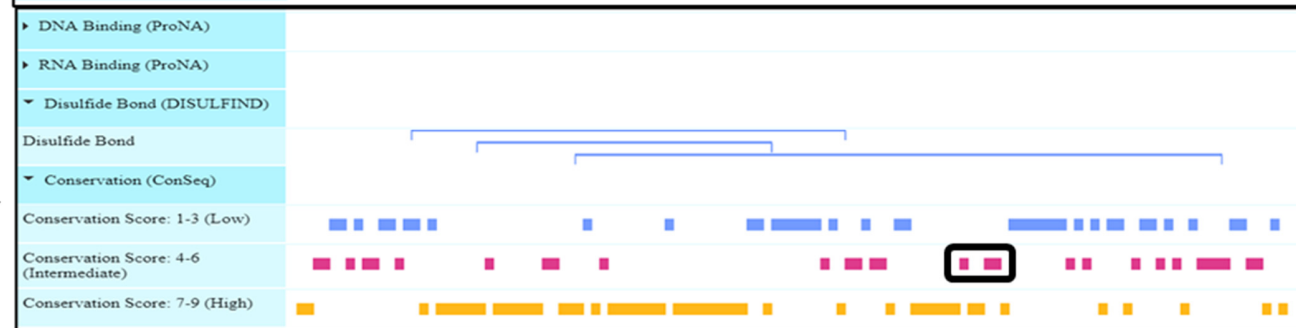

**Figure S16.** Viewer lays out predicted features of protein structural and functional features of ORF7a protein.

### Supplementary Tables

**Table S1:** Mutation of amino acids in Alpha & Delta Variant of SARs-CoV-2 from Pakistan with reference strain (hCoV-19/Wuhan/WIV04/2019).

| Alpha                              |       | Delta       |       |
|------------------------------------|-------|-------------|-------|
| Mutation                           | Count | Mutation    | Count |
| <b>Envelope</b>                    |       |             |       |
|                                    |       | E_V62F      | 1     |
| <b>Membrane</b>                    |       |             |       |
|                                    |       | M_I82T      | 8     |
| <b>Nucleocapsid phosphoprotein</b> |       |             |       |
| N_D3L                              | 5     | N_A90S      | 1     |
| N_G204R                            | 5     | N_D377Y     | 8     |
| N_Q389H                            | 1     | N_D63G      | 8     |
| N_R203K                            | 5     | N_G215C     | 4     |
| N_S235F                            | 5     | N_H300Y     | 1     |
|                                    |       | N_R203M     | 8     |
|                                    |       | N_R385K     | 1     |
| <b>NS3</b>                         |       |             |       |
| NS3_K16N                           | 1     | NS3_A23V    | 1     |
|                                    |       | NS3_G49V    | 1     |
|                                    |       | NS3_I118T   | 1     |
|                                    |       | NS3_I62F    | 1     |
|                                    |       | NS3_K16T    | 1     |
|                                    |       | NS3_L65I    | 1     |
|                                    |       | NS3_L73I    | 1     |
|                                    |       | NS3_Q116H   | 1     |
|                                    |       | NS3_S26L    | 8     |
|                                    |       | NS3_T221K   | 1     |
|                                    |       | NS3_Y211H   | 1     |
| <b>NS7a</b>                        |       |             |       |
|                                    |       | NS7a_L116F  | 2     |
|                                    |       | NS7a_T120I  | 8     |
|                                    |       | NS7a_V82A   | 8     |
| <b>NS7b</b>                        |       |             |       |
|                                    |       | NS7b_T40I   | 4     |
| <b>NS8</b>                         |       |             |       |
| NS8_R52I                           | 5     | NS8_Q27stop | 5     |

|              |   |             |   |
|--------------|---|-------------|---|
| NS8_V62L     | 1 |             |   |
| NS8_Y73C     | 5 |             |   |
| <b>NSP12</b> |   |             |   |
| NSP12_P323L  | 5 | NSP12_G228S |   |
|              |   | NSP12_G671S |   |
|              |   | NSP12_P323L |   |
|              |   | NSP12_Q357H |   |
|              |   | NSP12_V111L |   |
| <b>NSP13</b> |   |             |   |
|              |   | NSP13_M576I |   |
|              |   | NSP13_P77L  |   |
|              |   | NSP13_R392C |   |
|              |   | NSP13_S350L |   |
| <b>NSP14</b> |   |             |   |
|              |   | NSP14_A394V |   |
|              |   | NSP14_D144Y |   |
|              |   | NSP14_M72I  |   |
|              |   | NSP14_P46L  |   |
|              |   | NSP14_T113I |   |
| <b>NSP15</b> |   |             |   |
|              |   | NSP15_G229C |   |
|              |   | NSP15_H234Y |   |
|              |   | NSP15_V66L  |   |
| <b>NSP16</b> |   |             |   |
|              |   | NSP16_K160R |   |
|              |   | NSP16_M270I |   |
| <b>NSP2</b>  |   |             |   |
| NSP2_E345K   | 1 | NSP2_A386S  |   |
| NSP2_L550F   | 1 | NSP2_P129L  |   |
|              |   | NSP2_Y16H   |   |
| <b>NSP3</b>  |   |             |   |
| NSP3_A1321V  | 1 | NSP3_A416V  | 1 |
| NSP3_A1819V  | 1 | NSP3_A488S  | 4 |
| NSP3_A1941V  | 1 | NSP3_H1274Y | 1 |
| NSP3_A890D   | 5 | NSP3_K1693N | 1 |
| NSP3_I1412T  | 5 | NSP3_P1228L | 4 |
| NSP3_P153L   | 1 | NSP3_P1469S | 4 |
| NSP3_R586C   | 1 | NSP3_P822L  | 4 |



|               |   |               |   |
|---------------|---|---------------|---|
| NSP3_T183I    | 5 | NSP3_S1285F   | 1 |
| NSP3_T423I    | 1 | NSP3_S1370F   | 1 |
| NSP3_T779I    | 1 | NSP3_S1424F   | 1 |
|               |   | NSP3_V245F    |   |
| <b>NSP4</b>   |   |               |   |
|               |   | NSP4_A446V    | 4 |
|               |   | NSP4_T492I    | 4 |
|               |   | NSP4_V167L    | 4 |
| <b>NSP5</b>   |   |               |   |
|               |   | NSP5_V86L     | 1 |
| <b>NSP6</b>   |   |               |   |
| NSP6_F108del  | 5 | NSP6_T181I    | 2 |
| NSP6_G107del  | 5 | NSP6_T77A     | 4 |
| NSP6_S106del  | 5 | NSP6_V149A    | 4 |
| <b>Spike</b>  |   |               |   |
| Spike_A570D   | 5 | Spike_A1078V  | 1 |
| Spike_A67S    | 1 | Spike_A222V   | 2 |
| Spike_A688V   | 1 | Spike_C1250W  | 1 |
| Spike_D1118H  | 5 | Spike_D138Y   | 1 |
| Spike_D614G   | 5 | Spike_D215H   | 1 |
| Spike_H69del  | 5 | Spike_D574Y   | 1 |
| Spike_N501Y   | 5 | Spike_D614G   | 8 |
| Spike_P681H   | 5 | Spike_D950N   | 6 |
| Spike_S982A   | 5 | Spike_E156G   | 8 |
| Spike_S98F    | 1 | Spike_E484Q   | 1 |
| Spike_T716I   | 5 | Spike_F157del | 8 |
| Spike_V70del  | 5 | Spike_G142D   | 6 |
| Spike_S98F    | 1 | Spike_I850L   | 1 |
| Spike_Y144del | 5 | Spike_L1141W  | 1 |
|               |   | Spike_L452R   | 8 |
|               |   | Spike_P681R   | 8 |
|               |   | Spike_Q613H   | 1 |
|               |   | Spike_R158del | 8 |
|               |   | Spike_T19R    | 8 |
|               |   | Spike_T478K   | 8 |
|               |   | Spike_T95I    | 4 |
|               |   | Spike_V483A   | 1 |
